# Supplementary material for: Fe-catalyzed B–H and Si–H insertion reactions of gem-dihaloalkanes
Source: Royal Society of Chemistry journal article supplement (doi:10.1039/d4qo00136b), 2024-01-01

## Fe-Catalyzed B–H and Si–H Insertion Reactions of *gem*-Dihaloalkanes

Xinyu, Wang<sup>1,2</sup>, Zhaobin Wang<sup>2,3\*</sup>

<sup>1</sup> Department of Chemistry, Zhejiang University, Hangzhou 310058, China;

<sup>2</sup> Key Laboratory of Precise Synthesis of Functional Molecules of Zhejiang Province, Department of Chemistry, School of Science, Westlake University, Hangzhou 310030, China.

<sup>3</sup> Institute of Natural Sciences, Westlake Institute for Advanced Study, Hangzhou 310024, China.

Correspondence to: [wangzhaobin@westlake.edu.cn](mailto:wangzhaobin@westlake.edu.cn)

### Supporting Information

#### Table of Contents

|             |                                                    |           |
|-------------|----------------------------------------------------|-----------|
| <b>I.</b>   | <b>General Information .....</b>                   | <b>2</b>  |
| <b>II.</b>  | <b>Catalytic carbene insertion Reactions .....</b> | <b>3</b>  |
| <b>III.</b> | <b>Effect of Reaction Parameters.....</b>          | <b>25</b> |
| <b>IV.</b>  | <b>Preliminary Mechanistic Study .....</b>         | <b>29</b> |
| <b>V.</b>   | <b>References .....</b>                            | <b>32</b> |
| <b>VI.</b>  | <b>NMR Spectra .....</b>                           | <b>33</b> |

## I. General Information

Unless otherwise noted, reagents were used as received from Sigma-Aldrich, Alfa, TCI, Bidepharm, Energy Chemical, J&K, Adamas. All reactions were performed under an atmosphere of dry nitrogen gas. Anhydrous DME was purchased from J&K and stored under nitrogen gas. Other solvents were purified with activated aluminum oxide using a solvent-purification system. *Gem*-dihaloalkanes were synthesized from corresponding aldehydes based on reported literatures.<sup>1</sup>

NMR spectra were recorded on a Bruker spectrometer with a Prodigy broadband cryoprobe (500 MHz for <sup>1</sup>H and 126 MHz for <sup>13</sup>C or 600 MHz for <sup>1</sup>H and 151 MHz for <sup>13</sup>C); chemical shifts ( $\delta$ ) are reported in ppm downfield from tetramethylsilane, using the solvent resonance as the internal standard. High resolution mass spectrometric analysis was performed on ultra-performance liquid chromatography-time-of-flight mass spectrometer (Synapt-G2-Si, Waters, USA) with electron spray ionization (ESI) resource, Atmospheric pressure chemical ionization (APCI) resource. Gas chromatography-mass spectrometry analysis was performed on Gas chromatography-mass spectrometry system (5977C GC/MSD, Agilent, USA).

## II. Catalytic carbene insertion Reactions

### General procedure: Catalytic B-H carbene insertion Reactions.

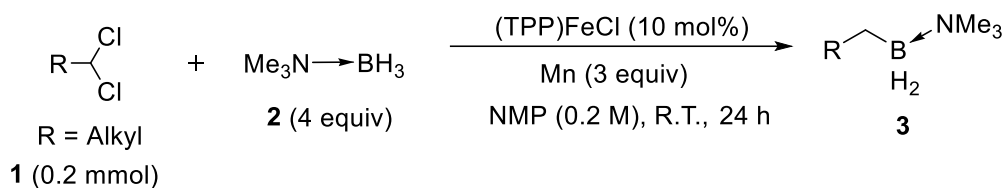

**General procedure 1 (GP-1):** Inside the glovebox under N<sub>2</sub> atmosphere, (TPP)FeCl (14.1 mg, 0.020 mmol, 0.10 equiv), Mn (33.2 mg, 0.6 mmol, 3.0 equiv) and N-Methylpyrrolidone (NMP) (1 mL) were added to an oven-dried 4 mL vial equipped with a magnetic stir bar. The reaction mixture was stirred (800 r/min) at room temperature for 0.5 hours. Next, the alkyl dichlorides (0.2 mmol, 1.0 equiv) and trimethylamine borane (58.4 mg, 0.80 mmol, 4.0 equiv) were added sequentially, The vial was quickly sealed with a PTFE septum cap. Then the vial was taken out of the glovebox, and stirred (800 r/min) at 25 °C for 24 hours.

**Work-up:** The reaction mixture was diluted with 1.0 mL ether, then the reaction solvent was removed by concentration under reduced pressure. The residue was subjected to flash column chromatography with petroleum ether (PE) and ethyl acetate (EA) as the eluent to afford the desired borane products.

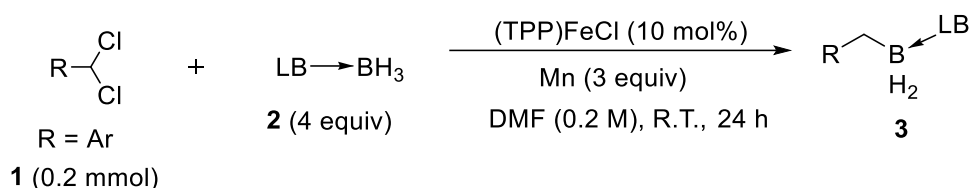

**General procedure 2 (GP-2):** Inside the glovebox under N<sub>2</sub> atmosphere, (TPP)FeCl (14.1 mg, 0.020 mmol, 0.10 equiv), Mn (33.2 mg, 0.6 mmol, 3.0 equiv) and N,N-dimethylformamide (DMF) (1 mL) were added to an oven-dried 4 mL vial equipped with a magnetic stir bar. The reaction mixture was stirred (800 r/min) at room temperature for 0.5 hours. Next, the aryl dichlorides (0.2 mmol, 1.0 equiv) and lewis base borane adduct (0.40 mmol, 2.0 equiv) were added sequentially, The vial was quickly sealed with a PTFE septum cap. Then the vial was taken out of the glovebox, and stirred (800 r/min) at 25 °C for 24 hours.

**Work-up:** The reaction mixture was diluted with 1.0 mL ether, then the reaction solvent was removed by concentration under reduced pressure. The residue was subjected to flash column chromatography with hexane and ethyl acetate (EA) as the eluent to afford the desired borane products.

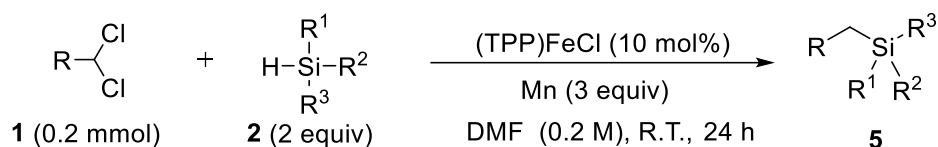

**General procedure 3 (GP-3):** Inside the glovebox under N<sub>2</sub> atmosphere, (TPP)FeCl (14.1 mg, 0.020 mmol, 0.10 equiv), Mn (33.2 mg, 0.60 mmol, 3.0 equiv) and N,N-dimethylformamide (DMF) (1 mL) were added to an oven-dried 4 mL vial equipped with a magnetic stir bar. The reaction mixture was stirred (800 r/min) at room temperature for 0.5 hours. Next, the aryl dichlorides (0.2 mmol, 1.0 equiv) and substituted silane (0.40 mmol, 2.0 equiv) were added sequentially, The vial was quickly sealed with a PTFE septum cap. Then the vial was taken out of the glovebox, and stirred (800 r/min) at 25 °C for 24 hours.

**Work-up:** The reaction mixture was diluted with 1.0 mL ether, then the reaction solvent was removed by concentration under reduced pressure. The residue was subjected to flash column chromatography with petroleum ether (PE) and ethyl acetate (EA) as the eluent to afford the desired silane products.

Note: some silane products have been reported in literature<sup>2-12</sup>

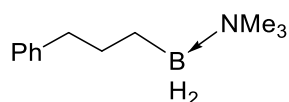

**Trimethylamine (3-phenylpropyl)borane (Figure 2, 3a).** The title compound was prepared according to the GP-1 from (3,3-dichloropropyl)benzene and trimethylamine borane, purified by flash column chromatography on silica gel: 20% EA in hexane, brown oil. 1st run: 26.3 mg, 69% yield; 2nd run: 26.4 mg, 70% yield.

<sup>1</sup>H NMR (600 MHz, Chloroform-*d*) δ 7.3 – 7.1 (m, 5H), 2.7 – 2.6 (m, 2H), 2.5 (s, 9H), 1.6 – 1.6 (m, 2H), 0.4 (p, *J* = 6.3 Hz, 2H).

<sup>13</sup>C NMR (126 MHz, Chloroform-*d*) δ 144.4, 128.5, 127.9, 125.0, 52.0, 39.6, 30.7.

HRMS (ESI) *m/z* [M-H]<sup>+</sup> calcd for C<sub>12</sub>H<sub>21</sub>BN: 190.1769, found:190.1775.

**Gram-scale reaction:** Inside the glovebox under N<sub>2</sub> atmosphere, Fe(TPP)Cl (781.5 mg, 1.110 mmol, 0.10 equiv), Mn (1.8 g, 33.3 mmol, 3.0 equiv) and N-Methylpyrrolidone (NMP) (55 mL) were added to an oven-dried 100 mL flask equipped with a magnetic stir bar. The reaction mixture was stirred (800 r/min) at room temperature for 0.5 hours. Next, (3,3-dichloropropyl)benzene (2.1 g, 11.1 mmol, 1.0 equiv) and trimethylamine borane (3.3 g, 44.4 mmol, 4.0 equiv) were added sequentially, The vial was quickly sealed with a PTFE septum cap. Then the vial was taken out of the glovebox, and stirred (800 r/min) at 25 °C for 24 hours.

**Work-up:** The reaction mixture was diluted with 55.0 mL ether, then the reaction solvent was removed by concentration under reduced pressure. The residue was purified by flash column chromatography on silica gel: 10% to 20% EA in hexane, brown oil. 1.25 g, 59% yield.

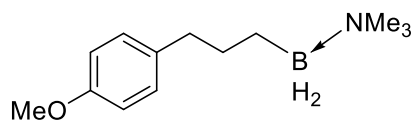

**Trimethylamine (3-(4-methoxyphenyl)propyl)borane (Figure 2, 3b).** The title compound was prepared according to the **GP-1** from 1-(3,3-dichloropropyl)-4-methoxybenzene and trimethylamine borane, purified by flash column chromatography on silica gel: 20% EA in hexane, yellow oil. 1st run: 22.6 mg, 51% yield; 2nd run: 23.0 mg, 52% yield.

$^1\text{H}$  NMR (600 MHz, Chloroform-*d*)  $\delta$  7.12 (d,  $J$  = 8.5 Hz, 2H), 6.80 (d,  $J$  = 8.6 Hz, 2H), 3.78 (s, 3H), 2.61 – 2.56 (m, 2H), 2.54 (s, 9H), 1.58 – 1.50 (m, 2H, with water), 0.42 (dq,  $J$  = 11.9, 6.2 Hz, 2H).

$^{13}\text{C}$  NMR (126 MHz, Chloroform-*d*)  $\delta$  157.2, 136.6, 129.3, 113.4, 55.2, 52.0, 38.6, 31.0.

HRMS (ESI)  $m/z$   $[\text{M-H}]^+$  calcd for  $\text{C}_{13}\text{H}_{23}\text{BNO}$ : 220.1875, found:220.1867.

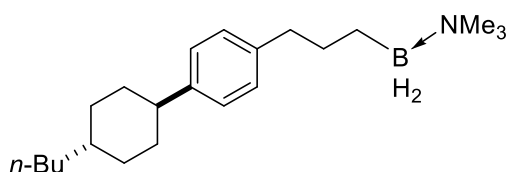

**Trimethylamine (3-(4-((1s,4r)-4-butylcyclohexyl)phenyl)propyl)borane (Figure 2, 3c).** The title compound was prepared according to the **GP-1** from 1-((1s,4r)-4-butylcyclohexyl)-4-(3,3-dichloropropyl)benzene and trimethylamine borane, purified by flash column chromatography on silica gel: 20% EA in hexane, yellow oil. 1st run: 38.2 mg, 58% yield; 2nd run: 37.5 mg, 57% yield.

$^1\text{H}$  NMR (600 MHz, Chloroform-*d*)  $\delta$  7.15 – 7.04 (m, 4H), 2.63 – 2.57 (m, 2H), 2.54 (s, 9H), 2.41 (tt,  $J$  = 11.8, 3.3 Hz, 1H), 1.93 – 1.81 (m, 5H), 1.71 (p,  $J$  = 7.8 Hz, 1H), 1.63 – 1.18 (m, 15H), 1.10 – 0.98 (m, 2H), 0.93 – 0.86 (m, 3H), 0.45 (dq,  $J$  = 11.8, 6.2 Hz, 2H).

$^{13}\text{C}$  NMR (126 MHz, Chloroform-*d*)  $\delta$  144.5, 141.7, 128.3, 126.4, 52.0, 44.2, 39.2, 37.3, 37.2, 34.4, 33.7, 30.8, 29.3, 23.0, 14.2.

HRMS (ESI)  $m/z$   $[\text{M-H}]^+$  calcd for  $\text{C}_{22}\text{H}_{39}\text{BN}$ : 328.3180, found:328.3176.

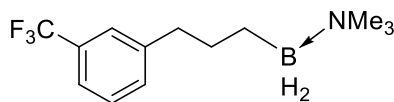

**Trimethylamine (3-(3-(trifluoromethyl)phenyl)propyl)borane (Figure 2, 3d).** The title compound was prepared according to the **GP-1** from 1-(3,3-dichloropropyl)-3-(trifluoromethyl)benzene and trimethylamine borane, purified by flash column chromatography on silica gel: 20% EA in hexane, yellow oil. 1st run: 31.6 mg, 61% yield; 2nd run: 31.1 mg, 60% yield.

$^1\text{H}$  NMR (600 MHz, Chloroform-*d*)  $\delta$  7.46 (d,  $J$  = 1.7 Hz, 1H), 7.41 – 7.31 (m, 3H), 2.73 – 2.63 (m, 2H), 2.54 (s, 9H), 1.59 (tt,  $J$  = 9.5, 6.8 Hz, 2H), 0.42 (dq,  $J$  = 13.3, 6.4 Hz, 2H).

$^{13}\text{C}$  NMR (126 MHz, Chloroform-*d*)  $\delta$  131.9, 130.1 (q,  $J$  = 31.6 Hz), 128.3, 125.3 (q,  $J$  = 3.7 Hz), 124.5 (q,  $J$  = 272.2 Hz), 121.9 (q,  $J$  = 3.9 Hz), 52.0, 39.1, 30.5.

$^{19}\text{F}$  NMR (565 MHz, Chloroform-*d*)  $\delta$  -62.4.

HRMS (ESI)  $m/z$   $[\text{M-H}]^+$  calcd for  $\text{C}_{13}\text{H}_{20}\text{BF}_3\text{N}$ : 258.1643, found:258.1655.

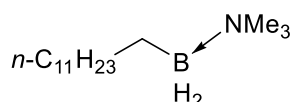

**Trimethylamine dodecylborane (Figure 2, 3e).** The title compound was prepared according to the **GP-1** from 1,1-dichlorododecane and trimethylamine borane, purified by flash column chromatography on silica gel: 20% EA in hexane, colorless oil. 1st run: 24.1 mg, 50% yield; 2nd run: 24.6 mg, 51% yield.

$^1\text{H}$  NMR (600 MHz, Chloroform-*d*)  $\delta$  2.55 (s, 9H), 1.32 – 1.21 (m, 22H), 0.87 (t,  $J = 7.0$  Hz, 3H), 0.37 (dq,  $J = 12.1, 6.3$  Hz, 2H).

$^{13}\text{C}$  NMR (126 MHz, Chloroform-*d*)  $\delta$  52.0, 33.6, 31.9, 30.0, 29.9, 29.8, 29.8, 29.7, 29.4, 28.8, 22.7, 14.1.

HRMS (ESI)  $m/z$   $[\text{M-H}]^+$  calcd for  $\text{C}_{15}\text{H}_{35}\text{BN}$ : 240.2865, found: 240.2865.

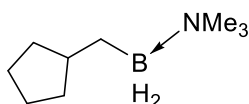

**Trimethylamine (cyclopentylmethyl)borane (Figure 2, 3f).** The title compound was prepared according to the **GP-1** from (dibromomethyl)cyclopentane and trimethylamine borane, purified by flash column chromatography on silica gel: 10% EA in hexane, colorless oil. 1st run: 25.4 mg, 82% yield; 2nd run: 25.8 mg, 83% yield.

$^1\text{H}$  NMR (600 MHz, Chloroform-*d*)  $\delta$  2.54 (s, 9H), 1.79 – 1.40 (m, 9H), 1.13 – 0.99 (m, 2H), 0.45 (q,  $J = 6.5$  Hz, 2H).

$^{13}\text{C}$  NMR (126 MHz, Chloroform-*d*)  $\delta$  51.9, 39.9, 35.7, 25.3.

HRMS (ESI)  $m/z$   $[\text{M-H}]^+$  calcd for  $\text{C}_9\text{H}_{21}\text{BN}$ : 154.1769, found: 154.1773.

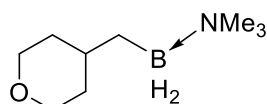

**Trimethylamine ((tetrahydro-2H-pyran-4-yl)methyl)borane (Figure 2, 3g).** The title compound was prepared according to the **GP-1** from 4-(dibromomethyl)tetrahydro-2H-pyran and trimethylamine borane, purified by flash column chromatography on silica gel: 40% EA in hexane, white soild. m.p.:72 – 73 °C. 1st run: 15.4 mg, 45% yield; 2nd run: 15.1 mg, 44% yield.

$^1\text{H}$  NMR (600 MHz, Chloroform-*d*)  $\delta$  3.90 (dtd,  $J = 11.5, 2.5, 1.1$  Hz, 2H), 3.36 (td,  $J = 11.7, 2.1$  Hz, 2H), 2.54 (s, 9H), 1.65 (ddd,  $J = 13.0, 4.0, 1.9$  Hz, 2H), 1.38 (dtq,  $J = 14.1, 6.7, 3.3$  Hz, 1H), 1.30 – 1.16 (m, 2H), 0.34 (q,  $J = 6.4$  Hz, 2H)

$^{13}\text{C}$  NMR (126 MHz, Chloroform-*d*)  $\delta$  68.8, 52.0, 36.5, 34.9.

HRMS (ESI)  $m/z$   $[\text{M-H}]^+$  calcd for  $\text{C}_9\text{H}_{21}\text{BNO}$ : 170.1718, found: 170.1722.

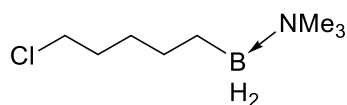

**Trimethylamine (5-chloropentyl)borane (Figure 2, 3h).** The title compound was

prepared according to the **GP-1** from 1,1-dibromo-5-chloropentane and trimethylamine borane, purified by flash column chromatography on silica gel: 20% EA in hexane, colorless oil. 1st run: 22.0 mg, 62% yield; 2nd run: 22.3 mg, 63% yield.

$^1\text{H}$  NMR (600 MHz, Chloroform-*d*)  $\delta$  3.53 (t,  $J = 7.0$  Hz, 2H), 2.55 (s, 9H), 1.78 (p,  $J = 7.1$  Hz, 2H), 1.48 – 1.41 (m, 2H), 1.32 – 1.21 (m, 2H), 0.38 (dq,  $J = 12.4, 6.5$  Hz, 2H).

$^{13}\text{C}$  NMR (126 MHz, Chloroform-*d*)  $\delta$  52.0, 45.7, 33.0, 30.5, 27.9.

HRMS (ESI)  $m/z$   $[\text{M-H}]^+$  calcd for  $\text{C}_8\text{H}_{20}\text{BNCl}$ : 176.1379, found: 176.1400.

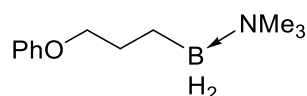

**Trimethylamine (3-phenoxypropyl)borane (Figure 2, 3i).** The title compound was prepared according to the **GP-1** from (3,3-dibromopropoxy)benzene and trimethylamine borane, purified by flash column chromatography on silica gel: 30% EA in hexane, colorless oil. 1st run: 21.5 mg, 52% yield; 2nd run: 21.1 mg, 51% yield.

$^1\text{H}$  NMR (600 MHz, Chloroform-*d*)  $\delta$  7.28 – 7.23 (m, 2H), 6.94 – 6.86 (m, 3H), 3.97 (t,  $J = 7.0$  Hz, 2H), 2.57 (s, 9H), 1.78 – 1.69 (m, 2H), 0.48 (dq,  $J = 12.3, 6.6$  Hz, 2H).

$^{13}\text{C}$  NMR (126 MHz, Chloroform-*d*)  $\delta$  159.5, 129.2, 119.9, 114.6, 71.1, 52.0, 28.2.

HRMS (ESI)  $m/z$   $[\text{M-H}]^+$  calcd for  $\text{C}_{12}\text{H}_{21}\text{BNO}$ : 206.1718, found: 206.1723.

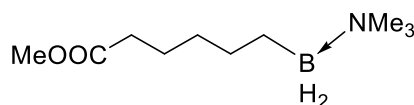

**Trimethylamine methyl 6-boranylhexanoate (Figure 2, 3j).** The title compound was prepared according to the **GP-1** from methyl 6,6-dibromohexanoate and trimethylamine borane, purified by flash column chromatography on silica gel: 35% EA in hexane, yellow soild. m.p.:102 – 103 °C. 1st run: 36.3 mg, 63% yield; 2nd run: 36.9 mg, 64% yield.

$^1\text{H}$  NMR (600 MHz, Chloroform-*d*)  $\delta$  3.65 (s, 3H), 2.54 (s, 9H), 2.35 – 2.20 (m, 2H), 1.66 – 1.59 (m, 2H), 1.38 – 1.28 (m, 2H), 1.28 – 1.13 (m, 2H), 0.36 (dq,  $J = 12.3, 6.3$  Hz, 2H).

$^{13}\text{C}$  NMR (126 MHz, Chloroform-*d*)  $\delta$  174.8, 52.0, 51.3, 34.3, 32.8, 28.2, 25.2.

HRMS (ESI)  $m/z$   $[\text{M-H}]^+$  calcd for  $\text{C}_{10}\text{H}_{23}\text{BNO}_2$ : 200.1824, found: 200.1826.

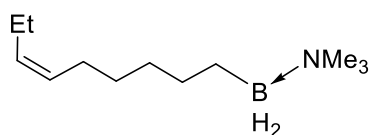

**Trimethylamine (Z)-non-6-en-1-ylborane (Figure 2, 3k).** The title compound was prepared according to the **GP-1** from (Z)-9,9-dichloronon-3-ene and trimethylamine borane, purified by flash column chromatography on silica gel: 20% EA in hexane, colorless oil. 1st run: 17.3 mg, 44% yield; 2nd run: 18.9 mg, 48% yield.

$^1\text{H}$  NMR (600 MHz, Chloroform-*d*)  $\delta$  5.39 – 5.28 (m, 2H), 2.55 (s, 9H), 2.10 – 1.93 (m, 5H), 1.40 – 1.28 (m, 5H), 1.28– 1.17(m, 2H), 0.95 (t,  $J = 7.5$  Hz, 3H), 0.37 (dq,  $J = 12.2, 6.3$  Hz, 2H).

$^{13}\text{C}$  NMR (126 MHz, Chloroform-*d*)  $\delta$  131.1, 129.9, 52.0, 33.2, 30.1, 28.6, 27.3, 20.5, 14.4.

HRMS (ESI)  $m/z$   $[M-H]^+$  calcd for  $C_{12}H_{27}BN$ : 196.2239, found: 196.2236.

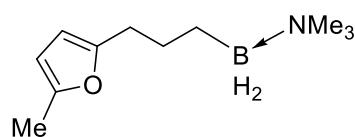

**Trimethylamine (3-(5-methylfuran-2-yl)propyl)borane (Figure 2, 3l).** The title compound was prepared according to the **GP-1** from 2-(3,3-dichloropropyl)-5-methylfuran and trimethylamine borane, purified by flash column chromatography on silica gel: 20% EA in hexane, yellow oil. 1st run: 19.9 mg, 51% yield; 2nd run: 20.3 mg, 52% yield.

$^1H$  NMR (600 MHz, Chloroform-*d*)  $\delta$  5.88 – 5.78 (m, 2H), 2.59 (t,  $J$  = 7.7 Hz, 2H), 2.55 (s, 9H), 2.24 (s, 3H), 1.60 – 1.53 (m, 2H), 0.44 (dq,  $J$  = 12.0, 6.2 Hz, 2H).

$^{13}C$  NMR (126 MHz, Chloroform-*d*)  $\delta$  156.5, 149.4, 105.6, 104.5, 52.0, 31.5, 27.3, 13.5.

HRMS (ESI)  $m/z$   $[M-H]^+$  calcd for  $C_{11}H_{21}BNO$ : 194.1718, found: 197.1717 .

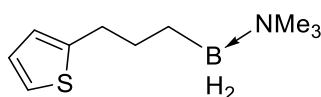

**Trimethylamine (3-(thiophen-2-yl)propyl)borane (Figure 2, 3m).** The title compound was prepared according to the **GP-1** from 2-(3,3-dichloropropyl)thiophene and trimethylamine borane, purified by flash column chromatography on silica gel: 20% EA in hexane, yellow oil. 1st run: 26.4 mg, 67% yield; 2nd run: 26.8 mg, 68% yield.

$^1H$  NMR (600 MHz, Chloroform-*d*)  $\delta$  7.06 (dd,  $J$  = 5.1, 1.2 Hz, 1H), 6.89 (dd,  $J$  = 5.1, 3.4 Hz, 1H), 6.80 – 6.73 (m, 1H), 2.89 – 2.79 (m, 2H), 2.55 (s, 9H), 1.69 – 1.60 (m, 2H), 0.47 (dq,  $J$  = 12.1, 6.3 Hz, 2H).

$^{13}C$  NMR (126 MHz, Chloroform-*d*)  $\delta$  147.7, 126.4, 123.4, 122.2, 52.0, 33.4, 31.1.

HRMS (ESI)  $m/z$   $[M-H]^+$  calcd for  $C_{10}H_{19}BNS$ : 196.1333, found: 196.1330.

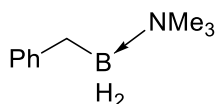

**Trimethylamine benzylborane (Figure 2, 3n).** The title compound was prepared according to the **GP-2** from (dichloromethyl)benzene and trimethylamine borane, purified by flash column chromatography on silica gel: 20% EA in hexane, colorless oil. 1st run: 24.1 mg, 75% yield; 2nd run: 24.0 mg, 74% yield.

$^1H$  NMR (500 MHz, Chloroform-*d*)  $\delta$  7.22 – 7.12 (m, 4H), 6.98 (tt,  $J$  = 5.7, 2.6 Hz, 1H), 2.55 (s, 9H), 1.94 (t,  $J$  = 5.6 Hz, 2H).

$^{13}C$  NMR (126 MHz, Chloroform-*d*)  $\delta$  148.0, 128.5, 127.8, 122.9, 52.1.

HRMS (ESI)  $m/z$   $[M - H]^+$  calcd for  $C_{10}H_{17}BN$ : 162.1456, found: 162.1455

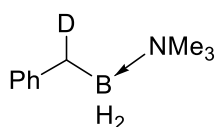



**Trimethylamine (phenylmethyl-*d*)borane (Figure 2, 3o).** The title compound was prepared according to the GP-2 from (dichloromethyl-*d*)benzene and trimethylamine borane, purified by flash column chromatography on silica gel: 20% EA in hexane, colorless oil. 1st run: 25 mg, 75% yield; 2nd run: 24.2 mg, 74% yield.

$^1\text{H}$  NMR (500 MHz, Chloroform-*d*)  $\delta$  7.21 – 7.12 (m, 4H), 7.03 – 6.94 (m, 1H), 2.55 (s, 9H), 2.29 – 1.98 (m, 1H), 1.92 (s, 1H), 1.87 – 1.60 (m, 1H).

$^{13}\text{C}$  NMR (126 MHz, Chloroform-*d*)  $\delta$  148.0, 128.5, 127.8, 122.9, 52.1.

HRMS (ESI)  $m/z$   $[\text{M} - \text{H}]^+$  calcd for  $\text{C}_{10}\text{H}_{16}\text{DBN}$ : 163.1519, found: 163.1519

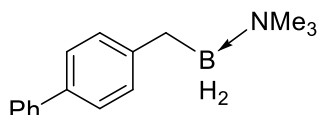

**Trimethylamine ([1,1'-biphenyl]-4-ylmethyl)borane (Figure 2, 3p).** The title compound was prepared according to the GP-2 from 4-(dichloromethyl)-1,1'-biphenyl and trimethylamine borane, purified by flash column chromatography on silica gel: 20% EA in hexane, white solid. m.p.:93 – 94 °C. 1st run: 23.4 mg, 49% yield; 2nd run: 23.9 mg, 50% yield.

$^1\text{H}$  NMR (500 MHz, Chloroform-*d*)  $\delta$  7.57 (dt,  $J = 7.7, 1.2$  Hz, 2H), 7.46 – 7.36 (m, 4H), 7.30-7.24 (m, 3H), 2.58 (s, 9H), 1.99 (t,  $J = 5.7$  Hz, 3H).

$^{13}\text{C}$  NMR (126 MHz, Chloroform-*d*)  $\delta$  147.4, 141.8, 128.8, 128.5, 126.8, 126.6, 126.3, 77.0, 52.1.

HRMS (ESI)  $m/z$   $[\text{M} - \text{H}]^+$  calcd for  $\text{C}_{16}\text{H}_{21}\text{BN}$ : 238.1770, found: 238.1775

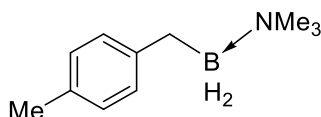

**Trimethylamine (4-methylbenzyl)borane (Figure 2, 3q).** The title compound was prepared according to the GP-2 from 1-(dichloromethyl)-4-methylbenzene and trimethylamine borane, purified by flash column chromatography on silica gel: 20% EA in hexane, colorless oil. 1st run: 22.6 mg, 64% yield; 2nd run: 23.4 mg, 66% yield.

$^1\text{H}$  NMR (500 MHz, Chloroform-*d*)  $\delta$  7.08 (d,  $J = 8.0$  Hz, 2H), 6.99 (d,  $J = 7.7$  Hz, 2H), 2.55 (s, 9H), 2.26 (s, 3H), 1.90 (t,  $J = 5.7$  Hz, 2H).

$^{13}\text{C}$  NMR (126 MHz, Chloroform-*d*)  $\delta$  144.7, 132.0, 128.5, 128.3, 52.1, 20.9.

HRMS (ESI)  $m/z$   $[\text{M} - \text{H}]^+$  calcd for  $\text{C}_{11}\text{H}_{19}\text{BN}$ : 176.1613, found: 176.1610.

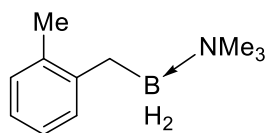

**Trimethylamine (2-methylbenzyl)borane (Figure 2, 3r).** The title compound was prepared according to the GP-2 from 1-(dichloromethyl)-2-methylbenzene and trimethylamine borane, purified by flash column chromatography on silica gel: 20% EA in hexane, colorless oil. 1st run: 24.4 mg, 69% yield; 2nd run: 24.0 mg, 68% yield.

$^1\text{H}$  NMR (500 MHz, Chloroform-*d*)  $\delta$  7.10 (dd,  $J = 7.5, 1.4$  Hz, 1H), 7.06 – 7.00 (m, 2H), 6.91

(td,  $J = 7.4, 1.5$  Hz, 1H), 2.61 (s, 9H), 2.33 (s, 3H), 1.88 (t,  $J = 5.9$  Hz, 2H).

$^{13}\text{C}$  NMR (126 MHz, Chloroform- $d$ )  $\delta$  145.7, 134.9, 129.6, 128.8, 125.4, 123.0, 51.9, 19.8.

HRMS (ESI)  $m/z$   $[\text{M} - \text{H}]^+$  calcd for  $\text{C}_{11}\text{H}_{19}\text{BN}$ : 176.1613, found: 176.1609.

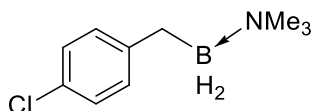

**Trimethylamine (4-chlorobenzyl)borane (Figure 2, 3s).** The title compound was prepared according to the **GP-2** from 1-chloro-4-(dichloromethyl)benzene and trimethylamine borane, purified by flash column chromatography on silica gel: 20% EA in hexane, colorless oil. 1st run: 28.8 mg, 73% yield; 2nd run: 29.6 mg, 75% yield.

$^1\text{H}$  NMR (500 MHz, Chloroform- $d$ )  $\delta$  7.15 – 7.07 (m, 4H), 2.55 (s, 9H), 1.89 (t,  $J = 5.0$  Hz, 2H).

$^{13}\text{C}$  NMR (126 MHz, Chloroform- $d$ )  $\delta$  146.5, 129.8, 128.3, 127.7, 52.1.

HRMS (ESI)  $m/z$   $[\text{M} - \text{H}]^+$  calcd for  $\text{C}_{10}\text{H}_{16}\text{BNCl}$ : 197.1066, found: 197.1066.

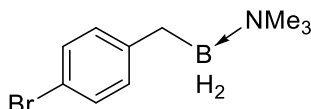

**Trimethylamine (4-bromobenzyl)borane (Figure 2, 3t).** The title compound was prepared according to the **GP-2** from 1-bromo-4-(dichloromethyl)benzene and trimethylamine borane, purified by flash column chromatography on silica gel: 20% EA in hexane, colorless oil. 1st run: 28.0 mg, 58% yield; 2nd run: 28.0 mg, 58% yield.

$^1\text{H}$  NMR (500 MHz, Chloroform- $d$ )  $\delta$  7.27 (d,  $J = 8.5$  Hz, 2H, with  $\text{CHCl}_3$ ), 7.08 – 7.02 (m, 2H), 2.55 (s, 9H), 1.88 (t,  $J = 5.1$  Hz, 2H).

$^{13}\text{C}$  NMR (126 MHz, Chloroform- $d$ )  $\delta$  147.1, 130.7, 130.3, 116.2, 52.1.

HRMS (ESI)  $m/z$   $[\text{M} - \text{H}]^+$  calcd for  $\text{C}_{10}\text{H}_{16}\text{BNBr}$ : 240.0561, found: 240.0564.

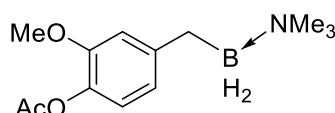

**Trimethylamine 4-(boraneylmethyl)-2-methoxyphenyl acetate (Figure 2, 3u).** The title compound was prepared according to the **GP-2** from 4-(dichloromethyl)-2-methoxyphenyl acetate and trimethylamine borane, purified by flash column chromatography on silica gel: 20% EA in hexane, grey solid. m.p.: 96 – 97 °C. 1st run: 17.6 mg, 35% yield; 2nd run: 16.6 mg, 33% yield.

$^1\text{H}$  NMR (600 MHz, Chloroform- $d$ )  $\delta$  6.87 – 6.77 (m, 2H), 6.72 (dd,  $J = 8.1, 1.9$  Hz, 1H), 3.80 (s, 3H), 2.55 (s, 9H), 2.28 (s, 3H), 1.93 (t,  $J = 5.2$  Hz, 2H).

$^{13}\text{C}$  NMR (126 MHz, Chloroform- $d$ )  $\delta$  169.5, 150.3, 147.2, 135.7, 121.6, 120.5, 112.7, 55.7, 52.1, 20.7.

HRMS (ESI)  $m/z$   $[\text{M} - \text{H}]^+$  calcd for  $\text{C}_{13}\text{H}_{21}\text{BNO}_3$ : 250.1617, found: 250.1619.

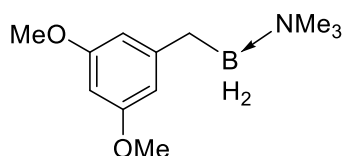

**Trimethylamine (3,5-dimethoxybenzyl)borane (Figure 2, 3v).** The title compound was prepared according to the **GP-2** from 1-(dichloromethyl)-3,5-dimethoxybenzene and trimethylamine borane, purified by flash column chromatography on silica gel: 20% EA in hexane, white solid. m.p.:89 – 90 °C.1st run: 28.6 mg, 64% yield; 2nd run: 29.0 mg, 65% yield.

$^1\text{H}$  NMR (600 MHz, Chloroform-*d*)  $\delta$  6.39 (d,  $J$  = 2.3 Hz, 2H), 6.14 (s, 1H), 3.76 (s, 6H), 2.54 (s, 9H), 1.91 (t,  $J$  = 5.4 Hz, 2H).

$^{13}\text{C}$  NMR (126 MHz, Chloroform-*d*)  $\delta$  160.3, 150.9, 106.5, 95.5, 55.1, 52.1.

HRMS (ESI)  $m/z$   $[\text{M} + \text{H}]^+$  calcd for  $\text{C}_{12}\text{H}_{22}\text{BNO}_2$ : 224.1824, found:224.1827.

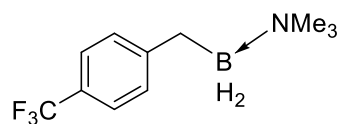

**Trimethylamine (4-(trifluoromethyl)benzyl)borane (Figure 2, 3w).** The title compound was prepared according to the **GP-2** from 1-(dichloromethyl)-4-(trifluoromethyl)benzene and trimethylamine borane, purified by flash column chromatography on silica gel: 20% EA in hexane, yellow oil. 1st run: 12.9 mg, 28% yield; 2nd run: 13.9 mg, 30% yield.

$^1\text{H}$  NMR (600 MHz, Chloroform-*d*)  $\delta$  7.41 (d,  $J$  = 8.0 Hz, 2H), 7.25 (d,  $J$  = 8.2 Hz, 2H), 2.58 (s, 9H), 1.98 (brs, 2H).

$^{13}\text{C}$  NMR (126 MHz, Chloroform-*d*)  $\delta$  152.7, 128.5, 125.0 (q,  $J$  = 32.0 Hz), 124.9 (q,  $J$  = 271.2 Hz), 124.6 (q,  $J$  = 3.7 Hz), 52.1.

$^{19}\text{F}$  NMR (565 MHz, Chloroform-*d*)  $\delta$  -61.8.

HRMS (ESI)  $m/z$   $[\text{M} - \text{H}]^+$  calcd for  $\text{C}_{11}\text{H}_{16}\text{BF}_3\text{N}$ : 230.1330, found:230.1334.

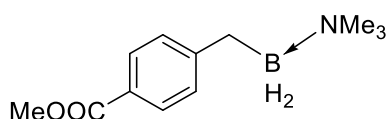

**Trimethylamine methyl 4-(boranemethyl)benzoate (Figure 2, 3x).** The title compound was prepared according to the **GP-2** from methyl 4-(dichloromethyl)benzoate and trimethylamine borane, purified by flash column chromatography on silica gel: 20% EA in hexane, colorless oil. 1st run: 13.3 mg, 30% yield; 2nd run: 13.3 mg, 30% yield.

$^1\text{H}$  NMR (600 MHz, Chloroform-*d*)  $\delta$  7.85 (d,  $J$  = 8.3 Hz, 2H), 7.22 (d,  $J$  = 8.3 Hz, 2H), 3.87 (s, 3H), 2.56 (s, 9H), 2.00 (t,  $J$  = 4.9 Hz, 2H).

$^{13}\text{C}$  NMR (126 MHz, Chloroform-*d*)  $\delta$  167.7, 154.9, 129.3, 128.4, 124.8, 52.1, 51.7.

HRMS (ESI)  $m/z$   $[\text{M} + \text{H}]^+$  calcd for  $\text{C}_{12}\text{H}_{21}\text{BNO}_2$ : 222.1668, found:222.1661.

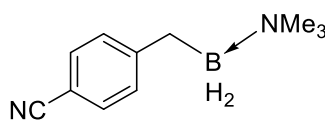

**Trimethylamine 4-(boraneylmethyl)benzonitrile (Figure 2, 3y).** The title compound was prepared according to the GP-2 from 4-(dichloromethyl)benzonitrile and trimethylamine borane, purified by flash column chromatography on silica gel: 30% EA in hexane, colorless oil. 1st run: 15.8 mg, 42% yield; 2nd run: 14.3 mg, 38% yield.

$^1\text{H}$  NMR (500 MHz, Chloroform-*d*)  $\delta$  7.47 – 7.40 (m, 2H), 7.25 – 7.19 (m, 2H), 2.58 (s, 9H), 1.98 (t,  $J$  = 5.7 Hz, 2H).

$^{13}\text{C}$  NMR (126 MHz, Chloroform-*d*)  $\delta$  154.8, 129.1, 120.1, 106.1, 52.1.

HRMS (ESI)  $m/z$   $[\text{M} + \text{H}]^+$  calcd for  $\text{C}_{11}\text{H}_{18}\text{BN}$ : 189.1565, found:189.1564 .

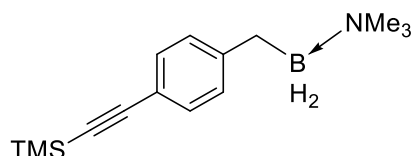

**Trimethylamine ((4-(boraneylmethyl)phenyl)ethynyl)trimethylsilane (Figure 2, 3z).** The title compound was prepared according to the GP-2 from ((4-(dichloromethyl)phenyl)ethynyl)trimethylsilane and trimethylamine borane, purified by flash column chromatography on silica gel: 20% EA in hexane, white solid. m.p.:97 – 98 °C. 1st run: 17.6 mg, 34% yield; 2nd run: 18.1 mg, 35% yield.

$^1\text{H}$  NMR (500 MHz, Chloroform-*d*)  $\delta$  7.29 (d,  $J$  = 8.2 Hz, 2H), 7.11 (d,  $J$  = 8.1 Hz, 2H), 2.52 (s, 9H), 1.94 (t,  $J$  = 5.1 Hz, 4H), 0.23 (s, 9H).

$^{13}\text{C}$  NMR (126 MHz, Chloroform-*d*)  $\delta$  149.7, 131.6, 128.4, 117.2, 106.4, 91.8, 52.1, 0.12.

HRMS (ESI)  $m/z$   $[\text{M} + \text{H}]^+$  calcd for  $\text{C}_{11}\text{H}_{27}\text{BNSi}$ : 260.2009, found:260.2007.

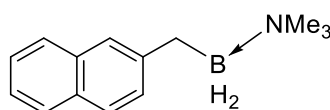

**Trimethylamine (naphthalen-2-ylmethyl)borane (Figure 2, 3aa).** The title compound was prepared according to the GP-2 from 2-(dichloromethyl)naphthalene and trimethylamine borane, purified by flash column chromatography on silica gel: 20% EA in hexane, colorless oil. 1st run: 25.6 mg, 60% yield; 2nd run: 25.2 mg, 59% yield.

$^1\text{H}$  NMR (600 MHz, Chloroform-*d*)  $\delta$  7.76 – 7.62 (m, 3H), 7.56 (s, 1H), 7.43 (dd,  $J$  = 8.4, 1.7 Hz, 1H), 7.36 (ddd,  $J$  = 8.2, 6.8, 1.3 Hz, 1H), 7.30 (ddd,  $J$  = 8.1, 6.8, 1.3 Hz, 1H), 2.56 (s, 9H), 2.12 (s, 2H).

$^{13}\text{C}$  NMR (126 MHz, Chloroform-*d*)  $\delta$  146.0, 134.0, 130.8, 128.9, 127.4, 127.0, 126.9, 125.1, 125.1, 123.6, 52.2.

HRMS (ESI)  $m/z$   $[\text{M} - \text{H}]^+$  calcd for  $\text{C}_{14}\text{H}_{19}\text{BN}$ : 212.1613, found:212.1620.

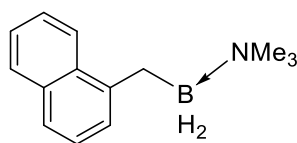

**Trimethylamine (naphthalen-1-ylmethyl)borane (Figure 2, 3ab).** The title compound was prepared according to the GP-2 from 1-(dichloromethyl)naphthalene and

trimethylamine borane, purified by flash column chromatography on silica gel: 20% EA in hexane, yellow oil. 1st run: 12.8 mg, 30% yield; 2nd run: 13.2 mg, 31% yield.

$^1\text{H}$  NMR (600 MHz, Chloroform-*d*)  $\delta$  8.28 – 8.21 (m, 1H), 7.80 – 7.73 (m, 1H), 7.52 (dt,  $J$  = 7.8, 1.1 Hz, 1H), 7.40 (dddd,  $J$  = 18.9, 8.0, 6.7, 1.5 Hz, 2H), 7.35 – 7.27 (m, 2H), 2.63 (s, 9H), 2.40 (t,  $J$  = 5.7 Hz, 2H).

$^{13}\text{C}$  NMR (126 MHz, Chloroform-*d*)  $\delta$  144.6, 134.1, 132.3, 128.3, 125.7, 125.6, 125.0, 124.8, 124.3, 123.6, 52.0.

HRMS (ESI)  $m/z$   $[\text{M} + \text{H}]^+$  calcd for  $\text{C}_{14}\text{H}_{21}\text{BN}$ : 214.1770, found: 214.1772.

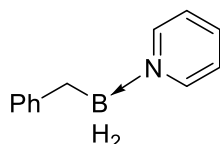

**Pyridine benzylborane (Figure 2, 3ac).** The title compound was prepared according to the GP-2 from (dichloromethyl)benzene and pyridine borane, purified by flash column chromatography on silica gel: 20% EA in hexane, white solid. m.p.: 74 – 75 °C. 1st run: 7.3 mg, 22% yield; 2nd run: 8.8 mg, 24% yield.

$^1\text{H}$  NMR (600 MHz, Chloroform-*d*)  $\delta$  8.29 (d,  $J$  = 5.7 Hz, 2H), 7.88 (t,  $J$  = 7.7 Hz, 1H), 7.42 – 7.36 (m, 2H), 7.05 (t,  $J$  = 7.5 Hz, 2H), 6.93 (t,  $J$  = 7.3 Hz, 1H), 6.84 – 6.71 (m, 2H), 2.08 (t,  $J$  = 4.8 Hz, 2H).

$^{13}\text{C}$  NMR (126 MHz, Chloroform-*d*)  $\delta$  148.3, 146.8, 139.2, 127.8, 127.7, 125.0, 122.7.

HRMS (ESI)  $m/z$   $[\text{M}-\text{H}]^+$  calcd for  $\text{C}_{12}\text{H}_{13}\text{BN}$ : 182.1141, found: 182.1141.

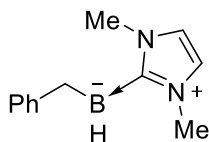

**NHC benzylborane complex (Figure 2, 3ad).** The title compound was prepared according to the GP-2 from (dichloromethyl)benzene and (1,3-Dihydro-1,3-dimethyl-2H-imidazol-2-ylidene)trihydroboron, purified by flash column chromatography on silica gel: 10% EA in hexane, white solid. m.p.: 92 – 93 °C. 1st run: 28.0 mg, 70% yield; 2nd run: 27.6 mg, 69% yield.

$^1\text{H}$  NMR (600 MHz, Chloroform-*d*)  $\delta$  7.03 (t,  $J$  = 7.5 Hz, 2H), 6.89 (t,  $J$  = 7.3 Hz, 1H), 6.77 (d,  $J$  = 7.4 Hz, 2H), 6.72 (s, 2H), 3.42 (s, 6H), 1.95 (s, 2H), 1.79 – 1.22 (m, 2H)

$^{13}\text{C}$  NMR (126 MHz, Chloroform-*d*)  $\delta$  151.8, 128.5, 127.6, 127.3, 127.0, 122.0, 119.9, 35.4, 27.3.

HRMS (ESI)  $m/z$   $[\text{M}-\text{H}]^+$  calcd for  $\text{C}_{12}\text{H}_{16}\text{BN}_2$ : 199.1409, found: 199.1410.

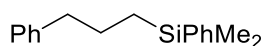

**Dimethyl(phenyl)(3-phenylpropyl)silane (Figure 3, 5a).**<sup>2</sup> The title compound was prepared according to the GP-3 from (3,3-dichloropropyl)benzene and dimethylphenylsilane, purified by flash column chromatography on silica gel: hexane, colorless oil. 1st run: 49.3 mg, 97% yield; 2nd run: 49.8 mg, 98% yield.

$^1\text{H}$  NMR (600 MHz, Chloroform-*d*)  $\delta$  7.51 – 7.47 (m, 2H), 7.34 (dd,  $J$  = 4.9, 1.9 Hz, 3H), 7.29 – 7.19 (m, 2H), 7.19 – 7.09 (m, 3H), 2.61 (t,  $J$  = 7.7 Hz, 2H), 1.68 – 1.57 (m, 2H), 0.86 – 0.65 (m, 2H), 0.25 (s, 6H).

$^{13}\text{C}$  NMR (151 MHz, Chloroform-*d*)  $\delta$  142.5, 139.4, 133.5, 128.8, 128.5, 128.2, 127.7, 125.6, 39.8, 26.0, 15.6, -3.1.

**Gram-scale reaction:** Inside the glovebox under  $\text{N}_2$  atmosphere,  $\text{Fe}(\text{TPP})\text{Cl}$  (423.8 mg, 0.602 mmol, 0.10 equiv), Mn (1.0 g, 18.1 mmol, 3.0 equiv) and DMF (30 mL) were added to an oven-dried 100 mL flask equipped with a magnetic stir bar. The reaction mixture was stirred (800 r/min) at room temperature for 0.5 hours. Next, (3,3-dichloropropyl)benzene (1.1 g, 6.0 mmol, 1.0 equiv) and dimethylphenylsilane (1.6 g, 12.0 mmol, 2.0 equiv) were added sequentially, The vial was quickly sealed with a PTFE septum cap. Then the vial was taken out of the glovebox, and stirred (800 r/min) at 25 °C for 24 hours.

**Work-up:** The reaction mixture was diluted with 30.0 mL ether, then the reaction solvent was removed by concentration under reduced pressure. The residue was purified by flash column chromatography on silica gel: hexane, colorless oil. 1.30 g, 83% yield.

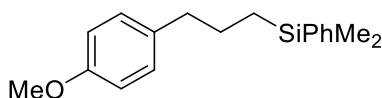

**(3-(4-methoxyphenyl)propyl)dimethyl(phenyl)silane (Figure 3, 5b).**<sup>3</sup> The title compound was prepared according to the GP-3 from 1-(3,3-dichloropropyl)-4-methoxybenzene and dimethylphenylsilane, purified by flash column chromatography on silica gel: hexane, colorless oil. 1st run: 48.8 mg, 86% yield; 2nd run: 48.3 mg, 85% yield.

$^1\text{H}$  NMR (500 MHz, Chloroform-*d*)  $\delta$  7.57 – 7.43 (m, 2H), 7.35 (dd,  $J$  = 4.5, 2.2 Hz, 3H), 7.14 – 6.97 (m, 2H), 6.97 – 6.76 (m, 2H), 3.79 (s, 3H), 2.56 (t,  $J$  = 7.6 Hz, 2H), 1.72 – 1.58 (m, 2H), 0.84 – 0.73 (m, 2H), 0.26 (s, 6H).

$^{13}\text{C}$  NMR (126 MHz, Chloroform-*d*)  $\delta$  157.7, 139.5, 134.7, 133.6, 129.4, 128.8, 127.7, 113.7, 55.3, 38.9, 26.2, 15.5, -3.0.

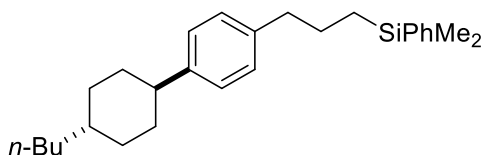

**(3-(4-((1s,4r)-4-butylcyclohexyl)phenyl)propyl)dimethyl(phenyl)silane (Figure 3, 5c).** The title compound was prepared according to the GP-3 from ((1s,4r)-4-butylcyclohexyl)-4-(3,3-dichloropropyl)benzene and dimethylphenylsilane, purified by flash column chromatography on silica gel: hexane, colorless oil. 1st run: 59.6 mg, 76% yield; 2nd run: 58.8 mg, 75% yield.

$^1\text{H}$  NMR (500 MHz, Chloroform-*d*)  $\delta$  7.53 – 7.45 (m, 2H), 7.37 – 7.30 (m, 3H), 7.11 (d,  $J$  = 8.1 Hz, 2H), 7.07 (d,  $J$  = 8.2 Hz, 2H), 2.58 (t,  $J$  = 7.7 Hz, 2H), 2.43 (tt,  $J$  = 12.2, 3.3 Hz, 1H), 1.96 – 1.78 (m, 4H), 1.69 – 1.59 (m, 2H), 1.44 (qd,  $J$  = 13.7, 13.2, 3.7 Hz, 2H), 1.37 – 1.19 (m, 7H), 1.05 (tdd,  $J$  = 12.8, 10.9, 3.7 Hz, 2H), 0.97 – 0.88 (m, 3H), 0.88 – 0.75 (m, 2H), 0.26 (s, 6H).

$^{13}\text{C}$  NMR (126 MHz, Chloroform-*d*)  $\delta$  145.2, 139.9, 139.5, 133.6, 128.8, 128.3, 127.7, 126.6, 44.2, 39.5, 37.3, 37.1, 34.4, 33.7, 29.2, 26.0, 23.0, 15.7, 14.2, -3.0.

GCMS (EI)  $m/z$   $[M-CH_3]^+$  calcd for  $C_{26}H_{37}Si$ : 377.3, found: 377.1.

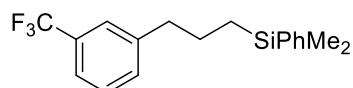

**Dimethyl(phenyl)(3-(3-(trifluoromethyl)phenyl)propyl)silane (Figure 3, 5d).** The title compound was prepared according to the **GP-3** from 1-(3,3-dichloropropyl)-3-(trifluoromethyl)benzene and dimethylphenylsilane, purified by flash column chromatography on silica gel: hexane, colorless oil. 1st run: 54.8 mg, 85% yield; 2nd run: 55.4 mg, 86% yield.

$^1H$  NMR (500 MHz, Chloroform-*d*)  $\delta$  7.51 – 7.46 (m, 2H), 7.45 – 7.41 (m, 1H), 7.39 – 7.33 (m, 5H), 7.32 – 7.28 (m, 1H), 2.66 (t,  $J = 7.6$  Hz, 2H), 1.71 – 1.56 (m, 2H), 0.84 – 0.71 (m, 2H), 0.26 (s, 6H).

$^{13}C$  NMR (126 MHz, Chloroform-*d*)  $\delta$  143.3, 139.1, 133.5, 131.9, 130.6 (q,  $J = 31.7$  Hz), 128.9, 128.6, 127.8, 125.1 (q,  $J = 3.8$  Hz), 124.3 (q,  $J = 272.2$  Hz), 122.6 (q,  $J = 3.9$  Hz), 39.4, 25.7, 15.5, -3.1F.

$^{19}F$  NMR (471 MHz, Chloroform-*d*)  $\delta$  -62.5

GCMS (EI)  $m/z$   $[M-CH_3]^+$  calcd for  $C_{17}H_{18}SiF_3$ : 307.1, found: 307.1.

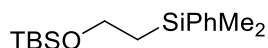

**Methyl 6-(dimethyl(phenyl)silyl)hexanoate (Figure 3, 5e).** The title compound was prepared according to the **GP-3** from tert-butyl(3,3-dibromopropoxy)dimethylsilane and dimethylphenylsilane, purified by flash column chromatography on silica gel: hexane, yellow oil. 1st run: 54.7 mg, 93% yield; 2nd run: 54.1 mg, 92% yield.

$^1H$  NMR (500 MHz, Chloroform-*d*)  $\delta$  7.54 – 7.45 (m, 2H), 7.39 – 7.30 (m, 3H), 3.55 (t,  $J = 6.9$  Hz, 2H), 1.62 – 1.45 (m, 2H), 0.89 (s, 9H), 0.71 (d,  $J = 4.8$  Hz, 2H), 0.26 (s, 6H), 0.03 (s, 6H).

$^{13}C$  NMR (126 MHz, Chloroform-*d*)  $\delta$  139.3, 133.5, 128.8, 127.7, 66.0, 27.2, 18.4, 11.3, -3.1, -5.2.

GCMS (EI)  $m/z$   $[M-H]^+$  calcd for  $C_{16}H_{29}OSi_2$ : 293.2, found: 293.1

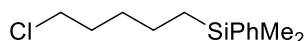

**(5-chloropentyl)dimethyl(phenyl)silane (Figure 3, 5f).** The title compound was prepared according to the **GP-3** from 1,1-dibromo-5-chloropentane and dimethylphenylsilane, purified by flash column chromatography on silica gel: hexane, colorless oil. 1st run: 39.4 mg, 82% yield; 2nd run: 39.5 mg, 82% yield.

$^1H$  NMR (500 MHz, Chloroform-*d*)  $\delta$  7.52 – 7.46 (m, 2H), 7.39 – 7.31 (m, 3H), 3.50 (t,  $J = 6.8$  Hz, 2H), 1.75 (dq,  $J = 9.0, 6.9$  Hz, 2H), 1.48 – 1.40 (m, 2H), 1.40 – 1.30 (m, 2H), 0.80 – 0.72 (m, 2H), 0.26 (s, 6H).

$^{13}C$  NMR (126 MHz, Chloroform-*d*)  $\delta$  139.4, 133.5, 128.8, 127.7, 45.1, 32.3, 30.7, 23.2, 15.6, -3.1.

GCMS (EI)  $m/z$   $[M]^+$  calcd for  $C_{13}H_{21}SiCl$ : 225.1, found: 225.2.

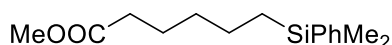

**Methyl 6-(dimethyl(phenyl)silyl)hexanoate (Figure 3, 5g).**<sup>4</sup> The title compound was prepared according to the **GP-3** from methyl 6,6-dibromohexanoate and dimethylphenylsilane, purified by flash column chromatography on silica gel: hexane, yellow oil. 1st run: 33.8mg, 64% yield; 2nd run: 33.3 mg, 63% yield.

<sup>1</sup>H NMR (500 MHz, Chloroform-*d*)  $\delta$  7.54 – 7.45 (m, 2H), 7.37 – 7.31 (m, 3H), 3.65 (s, 3H), 2.27 (t, *J* = 7.6 Hz, 2H), 1.65 – 1.55 (m, 3H), 1.39 – 1.26 (m, 4H), 0.78 – 0.70 (m, 2H), 0.25 (s, 6H).

<sup>13</sup>C NMR (126 MHz, CDCl<sub>3</sub>)  $\delta$  174.3, 139.5, 133.5, 128.8, 127.7, 51.4, 34.0, 33.0, 24.6, 23.5, 15.5, -3.1.

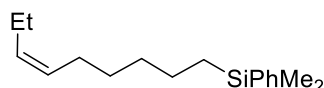

**(Z)-dimethyl(non-6-en-1-yl)(phenyl)silane (Figure 3, 5h).** The title compound was prepared according to the **GP-3** from 1-(3,3-dichloropropyl)-4-methoxybenzene and dimethylphenylsilane, purified by flash column chromatography on silica gel: hexane, colorless oil. 1st run: 26.7 mg, 51% yield; 2nd run: 26.9 mg, 51% yield.

<sup>1</sup>H NMR (500 MHz, Chloroform-*d*)  $\delta$  7.54 – 7.47 (m, 2H), 7.37 – 7.31 (m, 3H), 5.42 – 5.17 (m, 2H), 2.08 – 1.94 (m, 4H), 1.32 (s, 6H), 0.95 (t, *J* = 7.5 Hz, 3H), 0.80 – 0.68 (m, 2H), 0.25 (s, 6H).

<sup>13</sup>C NMR (126 MHz, Chloroform-*d*)  $\delta$  139.7, 133.5, 131.5, 129.3, 128.7, 127.7, 33.1, 29.3, 27.0, 23.7, 20.5, 15.7, 14.4, -3.0.

GCMS (EI) *m/z* [*M*]<sup>+</sup> calcd for C<sub>17</sub>H<sub>28</sub>Si: 260.2, found: 260.2.

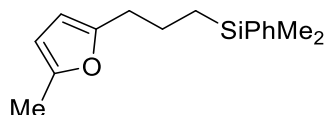

**Dimethyl(3-(5-methylfuran-2-yl)propyl)(phenyl)silane (Figure 3, 5i).** The title compound was prepared according to the **GP-3** from 2-(3,3-dichloropropyl)-5-methylfuran and dimethylphenylsilane, purified by flash column chromatography on silica gel: hexane, colorless oil. 1st run: 40.8 mg, 79% yield; 2nd run: 42.9 mg, 83% yield.

<sup>1</sup>H NMR (500 MHz, Chloroform-*d*)  $\delta$  7.56 – 7.46 (m, 2H), 7.37 – 7.30 (m, 3H), 5.84 – 5.79 (m, 2H), 2.57 (t, *J* = 7.5 Hz, 2H), 2.24 (s, 3H), 1.69 – 1.60 (m, 2H), 0.84 – 0.68 (m, 2H), 0.27 (s, 6H).

<sup>13</sup>C NMR (126 MHz, Chloroform-*d*)  $\delta$  154.4, 150.1, 139.3, 133.5, 128.8, 127.7, 105.7, 105.4, 31.8, 22.8, 15.5, 13.5, -3.1.

GCMS (EI) *m/z* [*M*]<sup>+</sup> calcd for C<sub>16</sub>H<sub>22</sub>SiO: 258.1, found: 258.2.

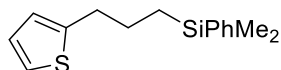

**Dimethyl(phenyl)(3-(thiophen-2-yl)propyl)silane (Figure 3, 5j).** The title compound was prepared according to the **GP-3** from 2-(3,3-dichloropropyl)thiophene and dimethylphenylsilane, purified by flash column chromatography on silica gel: hexane, colorless oil. 1st run: 40.6 mg, 78% yield; 2nd run: 41.1 mg, 79% yield.



$^1\text{H}$  NMR (500 MHz, Chloroform-*d*)  $\delta$  7.54 – 7.42 (m, 2H), 7.38 – 7.26 (m, 3H), 7.10 (dd,  $J$  = 5.1, 1.2 Hz, 1H), 6.91 (dd,  $J$  = 5.1, 3.4 Hz, 1H), 6.75 (dq,  $J$  = 3.3, 1.0 Hz, 1H), 2.83 (td,  $J$  = 7.4, 0.9 Hz, 2H), 1.76 – 1.62 (m, 2H), 0.91 – 0.75 (m, 2H), 0.27 (s, 6H).

$^{13}\text{C}$  NMR (126 MHz, Chloroform-*d*)  $\delta$  145.4, 139.2, 133.5, 128.8, 127.7, 126.6, 124.1, 122.8, 33.6, 26.4, 15.4, -3.1.

GCMS (EI)  $m/z$   $[\text{M}]^+$  calcd for  $\text{C}_{15}\text{H}_{20}\text{SiS}$ : 260.1, found: 260.2

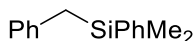

**Dimethyl(phenyl)(phenylmethyl-*d*)silane (Figure 3, 5k).**<sup>5</sup> The title compound was prepared according to the **GP-3** from (dichloromethyl)benzene and dimethylphenylsilane, purified by flash column chromatography on silica gel: hexane, colorless oil. 1st run: 38.0 mg, 84% yield; 2nd run: 38.4 mg, 85% yield.

$^1\text{H}$  NMR (600 MHz, Chloroform-*d*)  $\delta$  7.48 – 7.44 (m, 2H), 7.42 – 7.30 (m, 3H), 7.17 (t,  $J$  = 7.6 Hz, 2H), 7.09 – 7.04 (m, 1H), 6.97 – 6.90 (m, 2H), 2.30 (s, 2H), 0.24 (s, 6H).

$^{13}\text{C}$  NMR (151 MHz,  $\text{CDCl}_3$ )  $\delta$  139.7, 138.5, 133.7, 129.1, 128.3, 128.1, 127.7, 124.1, 26.2, -3.5.

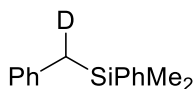

**Dimethyl(phenyl)(phenylmethyl-*d*)silane (Figure 3, 5l).** The title compound was prepared according to the **GP-3** from (dichloromethyl-*d*)benzene and dimethylphenylsilane, purified by flash column chromatography on silica gel: hexane, colorless oil. 1st run: 25.9 mg, 57% yield; 2nd run: 25.4 mg, 56% yield.

$^1\text{H}$  NMR (500 MHz, Chloroform-*d*)  $\delta$  7.49 – 7.44 (m, 2H), 7.39 – 7.32 (m, 3H), 7.18 (dd,  $J$  = 8.3, 6.8 Hz, 2H), 7.10 – 7.03 (m, 1H), 6.96 – 6.88 (m, 2H), 2.29 (s, 1H), 0.25 (s, 6H).

$^{13}\text{C}$  NMR (126 MHz, Chloroform-*d*)  $\delta$  139.6, 138.5, 133.7, 129.0, 128.3, 128.1, 127.7, 124.0, 25.8(t,  $J$  = 18.9 Hz), -3.5.

GCMS (EI)  $m/z$   $[\text{M}]^+$  calcd for  $\text{C}_{15}\text{H}_{17}\text{DSi}$ : 227.1, found: 227.2.

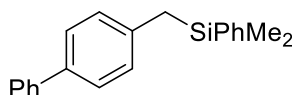

**([1,1'-biphenyl]-4-ylmethyl)dimethyl(phenyl)silane (Figure 3, 5m).**<sup>6</sup> The title compound was prepared according to the **GP-3** from 4-(dichloromethyl)-1,1'-biphenyl and dimethylphenylsilane, purified by flash column chromatography on silica gel: hexane, colorless oil. 1st run: 36.9 mg, 61% yield; 2nd run: 34.4 mg, 57% yield.

$^1\text{H}$  NMR (500 MHz, Chloroform-*d*)  $\delta$  7.61 – 7.54 (m, 2H), 7.51 – 7.46 (m, 2H), 7.45 – 7.28 (m, 8H), 7.03 – 6.97 (m, 2H), 2.34 (s, 2H), 0.28 (s, 6H).

$^{13}\text{C}$  NMR (126 MHz, Chloroform-*d*)  $\delta$  141.1, 138.9, 138.4, 136.9, 133.7, 129.1, 128.7, 128.7, 127.7, 126.8, 25.9, -3.4.

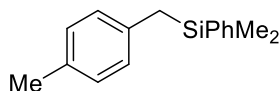

**Dimethyl(4-methylbenzyl)(phenyl)silane (Figure 3, 5n).**<sup>7</sup> The title compound was

prepared according to the **GP-3** from 1-(dichloromethyl)-4-methylbenzene and dimethylphenylsilane, purified by flash column chromatography on silica gel: hexane, colorless oil. 1st run: 29.8 mg, 62% yield; 2nd run: 30.3 mg, 63% yield.

$^1\text{H}$  NMR (500 MHz, Chloroform-*d*)  $\delta$  7.49 – 7.45 (m, 2H), 7.40 – 7.32 (m, 3H), 7.03 – 6.94 (m, 2H), 6.86 – 6.79 (m, 2H), 2.29 (s, 3H), 2.27 (s, 2H), 0.24 (s, 6H).

$^{13}\text{C}$  NMR (126 MHz, Chloroform-*d*)  $\delta$  138.7, 136.3, 133.7, 133.4, 129.0, 128.8, 128.2, 127.7, 25.5, 20.9, -3.4.

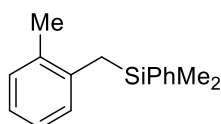

**Dimethyl(2-methylbenzyl)(phenyl)silane (Figure 3, 5o).**<sup>7</sup> The title compound was prepared according to the **GP-3** from 1-(dichloromethyl)-2-methylbenzene and dimethylphenylsilane, purified by flash column chromatography on silica gel: hexane, colorless oil. 1st run: 28.9 mg, 60% yield; 2nd run: 26.9 mg, 56% yield.

$^1\text{H}$  NMR (500 MHz, Chloroform-*d*)  $\delta$  7.48 – 7.42 (m, 2H), 7.39 – 7.31 (m, 3H), 7.22 – 7.19 (m, 1H), 7.09 – 6.96 (m, 3H), 6.90 (dd,  $J = 7.5, 1.5$  Hz, 1H), 2.31 (s, 2H), 2.07 (s, 3H), 0.27 (s, 6H).

$^{13}\text{C}$  NMR (126 MHz, Chloroform-*d*)  $\delta$  138.8, 138.1, 134.9, 133.6, 130.1, 129.0, 128.9, 127.7, 125.6, 124.2, 23.0, 20.2, -3.1.

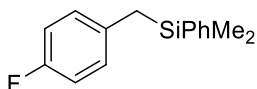

**(4-fluorobenzyl)dimethyl(phenyl)silane (Figure 3, 5p).**<sup>7</sup> The title compound was prepared according to the **GP-3** from 1-(dichloromethyl)-4-fluorobenzene and dimethylphenylsilane, purified by flash column chromatography on silica gel: hexane, colorless oil. 1st run: 42.0 mg, 86% yield; 2nd run: 41.5 mg, 85% yield.

$^1\text{H}$  NMR (500 MHz, Chloroform-*d*)  $\delta$  7.47 – 7.41 (m, 2H), 7.40 – 7.31 (m, 3H), 6.89 – 6.81 (m, 4H), 2.26 (s, 2H), 0.25 (s, 6H).

$^{13}\text{C}$  NMR (126 MHz, Chloroform-*d*)  $\delta$  160.4 (d,  $J = 241.4$  Hz), 138.1, 135.1 (d,  $J = 3.1$  Hz), 133.7, 129.3 (d,  $J = 7.5$  Hz), 129.1, 127.8, 114.8 (d,  $J = 21.0$  Hz), 25.2, -3.6.

$^{19}\text{F}$  NMR (565 MHz, Chloroform-*d*)  $\delta$  -120.2.

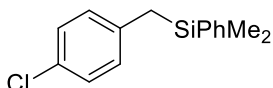

**(4-chlorobenzyl)dimethyl(phenyl)silane (Figure 3, 5q).** The title compound was prepared according to the **GP-3** from 1-chloro-4-(dichloromethyl)benzene and dimethylphenylsilane, purified by flash column chromatography on silica gel: hexane, colorless oil. 1st run: 29.1 mg, 56% yield; 2nd run: 29.1 mg, 56% yield.

$^1\text{H}$  NMR (500 MHz, Chloroform-*d*)  $\delta$  7.46 – 7.31 (m, 5H), 7.16 – 7.11 (m, 2H), 6.86 – 6.81 (m, 2H), 2.27 (s, 2H), 0.25 (s, 6H).

$^{13}\text{C}$  NMR (126 MHz, Chloroform-*d*)  $\delta$  138.2, 137.9, 133.7, 129.7, 129.5, 129.2, 128.1, 127.8, 25.7, -3.6.

GCMS (EI)  $m/z$   $[M]^+$  calcd for  $C_{15}H_{17}ClSi$ : 260.1 found: 260.1.

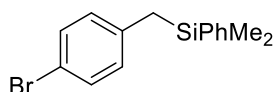

**(4-bromobenzyl)dimethyl(phenyl)silane (Figure 3, 5r).** The title compound was prepared according to the **GP-3** from 1-bromo-4-(dichloromethyl)benzene and dimethylphenylsilane, purified by flash column chromatography on silica gel: hexane, colorless oil. 1st run: 42.0 mg, 69% yield; 2nd run: 42.6 mg, 70% yield.

$^1H$  NMR (500 MHz, Chloroform-*d*)  $\delta$  7.46 – 7.32 (m, 5H), 7.28 (d,  $J$  = 8.4 Hz, 2H), 6.78 (dt,  $J$  = 8.6, 0.5 Hz, 2H), 2.25 (s, 2H), 0.25 (s, 6H).

$^{13}C$  NMR (126 MHz, Chloroform-*d*)  $\delta$  138.8, 137.9, 133.7, 131.1, 129.9, 129.2, 127.8, 117.6, 25.8, -3.6.

GCMS (EI)  $m/z$   $[M]^+$  calcd for  $C_{15}H_{17}BrSi$ : 304.0, found: 304.1.

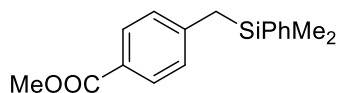

**Methyl 4-((dimethyl(phenyl)silyl)methyl)benzoate (Figure 3, 5s).**<sup>7</sup> The title compound was prepared according to the **GP-3** from methyl 4-(dichloromethyl)benzoate and dimethylphenylsilane, purified by flash column chromatography on silica gel: hexane, colorless oil. 1st run: 28.4 mg, 50% yield; 2nd run: 28.4 mg, 50% yield.

$^1H$  NMR (500 MHz, Chloroform-*d*)  $\delta$  7.85 (d,  $J$  = 8.3 Hz, 2H), 7.45 – 7.41 (m, 2H), 7.41 – 7.32 (m, 3H), 6.97 (d,  $J$  = 8.3 Hz, 2H), 3.89 (s, 3H), 2.38 (s, 2H), 0.26 (s, 6H).

$^{13}C$  NMR (126 MHz, Chloroform-*d*)  $\delta$  167.3, 146.0, 137.7, 133.7, 129.5, 129.3, 128.2, 127.8, 126.1, 51.9, 27.2, -3.5.

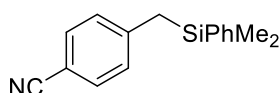

**4-((dimethyl(phenyl)silyl)methyl)benzonitrile (Figure 3, 5t).**<sup>7</sup> The title compound was prepared according to the **GP-3** from 4-(dichloromethyl)benzonitrile and dimethylphenylsilane, purified by flash column chromatography on silica gel: 5% EA in hexane, colorless oil. 1st run: 9.5 mg, 19% yield; 2nd run: 10.0 mg, 20% yield.

$^1H$  NMR (500 MHz, Chloroform-*d*)  $\delta$  7.47 – 7.30 (m, 7H), 6.98 – 6.91 (m, 2H), 2.38 (s, 2H), 0.27 (s, 6H).

$^{13}C$  NMR (126 MHz, Chloroform-*d*)  $\delta$  146.3, 137.1, 133.6, 131.9, 129.5, 128.8, 127.9, 119.4, 107.7, 27.7, -3.6.

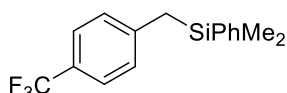

**Dimethyl(phenyl)(4-(trifluoromethyl)benzyl)silane (Figure 3, 5u).** The title compound was prepared according to the **GP-3** from 1-(dichloromethyl)-4-(trifluoromethyl)benzene and dimethylphenylsilane, purified by flash column chromatography on silica gel: hexane, colorless oil. 1st run: 20.0 mg, 34% yield; 2nd run: 19.4 mg, 33% yield.

$^1\text{H}$  NMR (500 MHz, Chloroform-*d*)  $\delta$  7.46 – 7.30 (m, 7H), 6.99 (d,  $J$  = 8.0 Hz, 2H), 2.36 (s, 2H), 0.26 (s, 6H).

$^{13}\text{C}$  NMR (126 MHz, Chloroform-*d*)  $\delta$  144.3, 137.6, 133.7, 129.3, 128.3, 127.9, 126.4 (q,  $J$  = 32.5 Hz), 125.0 (q,  $J$  = 3.8 Hz), 124.6 (q,  $J$  = 272.2 Hz) 26.7, -3.6.

$^{19}\text{F}$  NMR (471 MHz, Chloroform-*d*)  $\delta$  -62.0

GCMS (EI)  $m/z$   $[\text{M}]^+$  calcd for  $\text{C}_{16}\text{H}_{17}\text{SiF}_3$ : 294.1, found: 294.0.

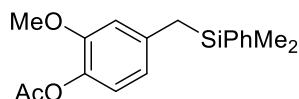

**4-((dimethyl(phenyl)silyl)methyl)-2-methoxyphenyl acetate (Figure 3, 5v).** The title compound was prepared according to the **GP-3** from 4-(dichloromethyl)-2-methoxyphenyl acetate and dimethylphenylsilane, purified by flash column chromatography on silica gel: hexane, white soild. m.p.:82 – 83 °C. 1st run: 35.2 mg, 56% yield; 2nd run: 34.6 mg, 55% yield.

$^1\text{H}$  NMR (500 MHz, Chloroform-*d*)  $\delta$  7.47 – 7.41 (m, 2H), 7.38 – 7.31 (m, 3H), 6.83 (d,  $J$  = 8.1 Hz, 1H), 6.51 (dd,  $J$  = 8.1, 2.0 Hz, 1H), 6.37 (d,  $J$  = 1.9 Hz, 1H), 3.61 (s, 3H), 2.28 (s, 3H), 2.27 (s, 2H), 0.27 (s, 6H).

$^{13}\text{C}$  NMR (126 MHz, Chloroform-*d*)  $\delta$  169.3, 150.4, 138.6, 138.1, 136.5, 133.8, 129.1, 127.7, 122.2, 120.2, 112.5, 55.5, 26.3, 20.7, -3.5.

HRMS (APCI)  $m/z$   $[\text{M}+\text{H}]^+$  calcd for  $\text{C}_{18}\text{H}_{23}\text{SiO}_3$ : 315.1416, found: 315.1415.

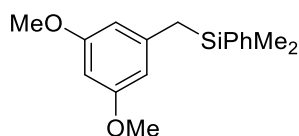

**(3,5-dimethoxybenzyl)dimethyl(phenyl)silane (Figure 3, 5w)** The title compound was prepared according to the **GP-3** from 1-(dichloromethyl)-3,5-dimethoxybenzene and dimethylphenylsilane, purified by flash column chromatography on silica gel: hexane, colorless oil. 1st run: 43.5 mg, 76% yield; 2nd run: 42.9 mg, 75% yield.

$^1\text{H}$  NMR (500 MHz, Chloroform-*d*)  $\delta$  7.51 – 7.44 (m, 2H), 7.40 – 7.32 (m, 3H), 6.20 (t,  $J$  = 2.3 Hz, 1H), 6.08 (d,  $J$  = 2.3 Hz, 2H), 3.68 (s, 6H), 2.26 (s, 2H), 0.28 (s, 6H).

$^{13}\text{C}$  NMR (126 MHz, Chloroform-*d*)  $\delta$  160.4, 142.0, 133.7, 129.0, 127.7, 106.3, 96.5, 55.1, 26.7, -3.4.

HRMS (APCI)  $m/z$   $[\text{M}+\text{H}]^+$  calcd for  $\text{C}_{17}\text{H}_{23}\text{SiO}_2$ : 287.1467, found: 287.1478.

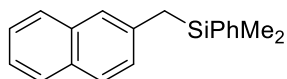

**Dimethyl(naphthalen-2-ylmethyl)(phenyl)silane (Figure3, 5x).**<sup>7</sup> The title compound was prepared according to the **GP-3** from 2-(dichloromethyl)naphthalene and dimethylphenylsilane, purified by flash column chromatography on silica gel: hexane, white soild. m.p.:84 – 85 °C. 1st run: 34.8 mg, 63% yield; 2nd run: 34.2 mg, 62% yield.

$^1\text{H}$  NMR (500 MHz, Chloroform-*d*)  $\delta$  7.76 (dd,  $J$  = 8.0, 1.3 Hz, 1H), 7.69 – 7.63 (m, 2H), 7.50 – 7.46 (m, 2H), 7.44 – 7.32 (m, 6H), 7.08 (dd,  $J$  = 8.4, 1.8 Hz, 1H), 2.47 (s, 2H), 0.28 (s, 6H).

$^{13}\text{C}$  NMR (126 MHz, Chloroform-*d*)  $\delta$  138.4, 137.4, 133.7, 131.1, 129.1, 128.0, 127.8, 127.5, 127.5, 127.0, 125.7, 125.6, 124.4, 26.5, -3.4.

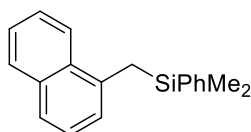

**Dimethyl(naphthalen-1-ylmethyl)(phenyl)silane (Figure 3, 5y).**<sup>7</sup> The title compound was prepared according to the **GP-3** from 1-(dichloromethyl)naphthalene and dimethylphenylsilane, purified by flash column chromatography on silica gel: hexane, white solid. m.p.: 77 – 78 °C. 1st run: 16.6 mg, 30% yield; 2nd run: 17.1 mg, 31% yield.

$^1\text{H}$  NMR (500 MHz, Chloroform-*d*)  $\delta$  7.90 – 7.76 (m, 2H), 7.61 (d,  $J$  = 8.2 Hz, 1H), 7.52 – 7.45 (m, 2H), 7.45 – 7.30 (m, 6H), 7.13 – 7.08 (m, 1H), 2.79 (s, 2H), 0.21 (s, 6H).

$^{13}\text{C}$  NMR (126 MHz, Chloroform-*d*)  $\delta$  138.7, 136.4, 133.9, 133.6, 131.7, 129.1, 128.5, 127.8, 125.7, 125.4, 125.3, 125.0, 124.9, 124.7, 22.7, -2.9.

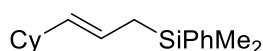

**(E)-(3-cyclohexylallyl)dimethyl(phenyl)silane (Figure 3, 5z).** The title compound was prepared according to the **GP-3** from the mixture of (*E*)-(3,3-dichloroprop-1-en-1-yl)cyclohexane and (1,3-dichloroallyl)cyclohexane (in 1:10 ratio), and dimethylphenylsilane, purified by flash column chromatography on silica gel: hexane, colorless oil. 1st run: 31.5 mg, 61% yield; 2nd run: 32.0 mg, 62% yield.

$^1\text{H}$  NMR (600 MHz, Chloroform-*d*)  $\delta$  7.55 – 7.45 (m, 2H), 7.36 – 7.27 (m, 3H), 5.38 – 5.28 (m, 1H), 1.92 – 1.84 (m, 1H), 1.72 – 1.57 (m, 7H), 1.29 – 1.18 (m, 2H), 1.17 – 1.08 (m, 1H), 1.07 – 0.96 (m, 2H), 0.25 (s, 6H).

$^{13}\text{C}$  NMR (151 MHz, Chloroform-*d*)  $\delta$  139.1, 136.0, 133.7, 128.9, 127.7, 122.7, 41.0, 33.5, 26.3, 26.1, 21.6, -3.4.

GCMS (EI)  $m/z$  [ $\text{M}$ ]<sup>+</sup> calcd for  $\text{C}_{17}\text{H}_{26}\text{Si}$ : 258.2, found: 258.2.

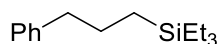

**Triethyl(3-phenylpropyl)silane (Figure 3, 5ab).**<sup>6</sup> The title compound was prepared according to the **GP-3** from (3,3-dichloropropyl)benzene and triethylsilane, purified by flash column chromatography on silica gel: hexane, yellow oil. 1st run: 45.9 mg, 98% yield; 2nd run: 45.4 mg, 97% yield.

$^1\text{H}$  NMR (500 MHz, Chloroform-*d*)  $\delta$  7.31 – 7.25 (m, 2H), 7.21 – 7.13 (m, 3H), 2.62 (t,  $J$  = 7.7 Hz, 2H), 1.65 – 1.58 (m, 2H), 0.91 (t,  $J$  = 7.9 Hz, 9H), 0.59 – 0.54 (m, 2H), 0.50 (q,  $J$  = 7.9 Hz, 6H).

$^{13}\text{C}$  NMR (126 MHz, Chloroform-*d*)  $\delta$  142.8, 128.5, 128.2, 125.6, 40.3, 26.1, 11.3, 7.5, 3.3.

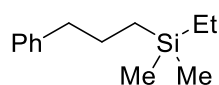

**Ethyldimethyl(3-phenylpropyl)silane (Figure 3, 5ac).**<sup>8</sup> The title compound was prepared

according to the **GP-3** from (3,3-dichloropropyl)benzene and ethyldimethylsilane, purified by flash column chromatography on silica gel: hexane, yellow oil. 1st run: 35.9 mg, 87% yield; 2nd run: 35.5 mg, 86% yield.

$^1\text{H}$  NMR (500 MHz, Chloroform-*d*)  $\delta$  7.31 – 7.26 (m, 2H), 7.21 – 7.14 (m, 3H), 2.62 (t,  $J = 7.7$  Hz, 2H), 1.66 – 1.56 (m, 2H), 0.90 (t,  $J = 7.9$  Hz, 3H), 0.59 – 0.52 (m, 2H), 0.47 (q,  $J = 7.9$  Hz, 2H), -0.06 (s, 6H).

$^{13}\text{C}$  NMR (126 MHz, Chloroform-*d*)  $\delta$  142.8, 128.5, 128.2, 125.6, 40.0, 26.1, 14.8, 7.4, 6.9, -3.9.

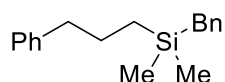

**Benzyldimethyl(3-phenylpropyl)silane (Figure 3, 5ad).**<sup>9</sup> The title compound was prepared according to the **GP-3** from (3,3-dichloropropyl)benzene and benzyldimethylsilane, purified by flash column chromatography on silica gel: hexane, yellow oil. 1st run: 52.6 mg, 98% yield; 2nd run: 53.1 mg, 99% yield.

$^1\text{H}$  NMR (500 MHz, Chloroform-*d*)  $\delta$  7.30 – 7.26 (m, 2H), 7.21 – 7.11 (m, 5H), 7.10 – 7.02 (m, 1H), 6.98 – 6.92 (m, 2H), 2.60 (t,  $J = 7.6$  Hz, 2H), 2.06 (s, 2H), 1.65 – 1.56 (m, 2H), 0.60 – 0.50 (m, 2H), -0.05 (s, 6H).

$^{13}\text{C}$  NMR (126 MHz, Chloroform-*d*)  $\delta$  142.6, 140.3, 128.5, 128.2, 128.1, 128.0, 125.7, 123.9, 39.9, 26.0, 25.5, 14.6, -3.6.

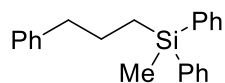

**Methyl(diphenyl)(3-phenylpropyl)silane (Figure 3, 5ae).**<sup>10</sup> The title compound was prepared according to the **GP-3** from (3,3-dichloropropyl)benzene and methyl(diphenyl)silane, purified by flash column chromatography on silica gel: hexane, yellow oil. 1st run: 26.6 mg, 42% yield; 2nd run: 25.9 mg, 41% yield.

$^1\text{H}$  NMR (500 MHz, Chloroform-*d*)  $\delta$  7.51 – 7.43 (m, 4H), 7.39 – 7.30 (m, 5H), 7.28 – 7.23 (m, 3H), 7.19 – 7.14 (m, 1H), 7.14 – 7.09 (m, 2H), 2.64 (t,  $J = 7.6$  Hz, 2H), 1.76 – 1.63 (m, 2H), 1.19 – 1.07 (m, 2H), 0.53 (s, 3H).

$^{13}\text{C}$  NMR (126 MHz, Chloroform-*d*)  $\delta$  142.3, 137.2, 134.5, 129.1, 128.5, 128.2, 127.8, 125.7, 39.7, 25.8, 13.9, -4.5.

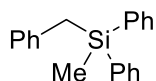

**Benzyl(methyl)diphenylsilane (Figure 3, 5af).**<sup>5</sup> The title compound was prepared according to the **GP-3** from (dichloromethyl)benzene and methyl(diphenyl)silane, purified by flash column chromatography on silica gel: hexane, colorless oil. 1st run: 39.2 mg, 68% yield; 2nd run: 38.6 mg, 67% yield.

$^1\text{H}$  NMR (500 MHz, Chloroform-*d*)  $\delta$  7.50 – 7.44 (m, 4H), 7.41 – 7.30 (m, 6H), 7.15 – 7.10 (m, 2H), 7.08 – 7.02 (m, 1H), 6.92 – 6.85 (m, 2H), 2.63 (s, 2H), 0.48 (s, 3H).

$^{13}\text{C}$  NMR (126 MHz,  $\text{CDCl}_3$ )  $\delta$  138.9, 136.4, 134.7, 129.3, 128.7, 128.1, 127.8, 124.3, 24.5, -4.8.

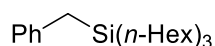

**Benzyltrihexylsilane (Figure 3, 5ag).** The title compound was prepared according to the GP-3 from (dichloromethyl)benzene and trihexylsilane, purified by flash column chromatography on silica gel: hexane, yellow oil. 1st run: 71.1 mg, 95% yield; 2nd run: 71.9 mg, 96% yield.

$^1\text{H}$  NMR (500 MHz, Chloroform-*d*)  $\delta$  7.20 (t,  $J = 7.7$  Hz, 2H), 7.08 – 7.02 (m, 1H), 7.02 – 6.97 (m, 2H), 2.08 (s, 2H), 1.31 – 1.21 (m, 24H), 0.89 (t,  $J = 6.9$  Hz, 9H), 0.52 – 0.44 (m, 6H).

$^{13}\text{C}$  NMR (151 MHz, Chloroform-*d*)  $\delta$  140.8, 128.1, 123.7, 77.0, 33.5, 31.5, 23.7, 22.7, 22.6, 14.1, 12.0.

GCMS (EI)  $m/z$   $[M]^+$  calcd for  $\text{C}_{25}\text{H}_{46}\text{Si}$ : 374.3 found: 374.4

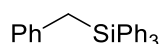

**Benzyltriphenylsilane (Figure 3, 5ah).** The title compound was prepared according to the GP-3 from (dichloromethyl)benzene and triphenylsilane, purified by flash column chromatography on silica gel: hexane, white soild. m.p.:105 – 106 °C. 1st run: 41.3 mg, 59% yield; 2nd run: 42.0 mg, 60% yield.

$^1\text{H}$  NMR (600 MHz, Chloroform-*d*)  $\delta$  7.45 – 7.37 (m, 9H), 7.36 – 7.31 (m, 6H), 7.09 – 7.00 (m, 3H), 6.89 – 6.80 (m, 2H), 2.93 (s, 2H).

$^{13}\text{C}$  NMR (151 MHz, Chloroform-*d*)  $\delta$  138.2, 136.0, 134.2, 129.5, 129.2, 128.0, 127.7, 124.4, 23.4

GCMS (EI)  $m/z$   $[M]^+$  calcd for  $\text{C}_{14}\text{H}_{16}\text{Si}$ : 350.1, found: 350.2.

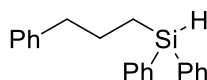

**Diphenyl(3-phenylpropyl)silane (Figure 3, 5ai).** The title compound was prepared according to the GP-3 from (3,3-dichloropropyl)benzene and diphenylsilane, purified by flash column chromatography on silica gel: hexane, yellow oil. 1st run: 26.6 mg, 44% yield; 2nd run: 26.0 mg, 43% yield.

$^1\text{H}$  NMR (600 MHz, Chloroform-*d*)  $\delta$  7.55 – 7.51 (m, 4H), 7.41 – 7.36 (m, 2H), 7.37 – 7.31 (m, 5H), 7.28 – 7.23 (m, 3H), 7.18 – 7.15 (m, 1H), 7.14 – 7.10 (m, 2H), 4.86 (t,  $J = 3.7$  Hz, 1H), 2.67 (t,  $J = 7.6$  Hz, 2H), 1.78 (tt,  $J = 8.7, 6.8$  Hz, 2H), 1.18 (dt,  $J = 11.8, 3.8$  Hz, 2H).

$^{13}\text{C}$  NMR (151 MHz, Chloroform-*d*)  $\delta$  142.1, 135.1, 134.3, 129.5, 128.5, 128.2, 128.0, 125.7, 39.2, 26.3, 11.8.

GCMS (EI)  $m/z$   $[M]^+$  calcd for  $\text{C}_{21}\text{H}_{22}\text{Si}$ : 302.1, found: 302.2

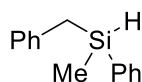

**Benzyl(methyl)(phenyl)silane (Figure 3, 5aj).** The title compound was prepared according to the GP-3 from (dichloromethyl)benzene and methyl(phenyl)silane, purified by flash column chromatography on silica gel: hexane, colorless oil. 1st run: 14.8 mg, 35% yield; 2nd run: 14.4 mg, 34% yield.

$^1\text{H}$  NMR (500 MHz, Chloroform-*d*)  $\delta$  7.50 – 7.44 (m, 2H), 7.41 – 7.32 (m, 3H), 7.23 – 7.17 (m, 2H), 7.13 – 7.04 (m, 1H), 7.04 – 6.97 (m, 2H), 4.53 – 4.29 (m, 1H), 2.43 (dd,  $J = 13.9, 3.0$  Hz, 1H), 2.33 (dd,  $J = 13.9, 4.1$  Hz, 1H), 0.31 (d,  $J = 3.7$  Hz, 3H).

$^{13}\text{C}$  NMR (126 MHz, Chloroform-*d*)  $\delta$  139.2, 135.5, 134.4, 129.5, 128.4, 128.3, 127.8, 124.4, 23.5, -6.2.

GCMS (EI)  $m/z$   $[\text{M}]^+$  calcd for  $\text{C}_{14}\text{H}_{16}\text{Si}$ : 212.1, found: 212.2.

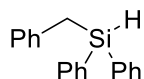

**Benzylidiphenylsilane (Figure 3, 5ak).**<sup>11</sup> The title compound was prepared according to the GP-3 from (dichloromethyl)benzene and diphenylsilane, purified by flash column chromatography on silica gel: hexane, colorless oil. 1st run: 49.3 mg, 90% yield; 2nd run: 48.8 mg, 89% yield.

$^1\text{H}$  NMR (600 MHz, Chloroform-*d*)  $\delta$  7.51 – 7.47 (m, 4H), 7.42 – 7.37 (m, 2H), 7.34 (dd,  $J = 7.9, 6.6$  Hz, 4H), 7.16 (t,  $J = 7.6$  Hz, 2H), 7.10 – 7.04 (m, 1H), 7.02 – 6.97 (m, 2H), 4.94 (t,  $J = 3.8$  Hz, 1H), 2.68 (d,  $J = 3.8$  Hz, 2H).

$^{13}\text{C}$  NMR (151 MHz, Chloroform-*d*)  $\delta$  138.6, 135.3, 133.6, 129.7, 128.7, 128.3, 128.0, 124.6, 22.3.

#### Unsuccessful substrates for B–H or Si–H insertions:

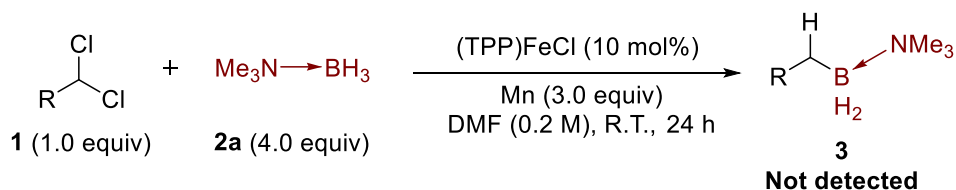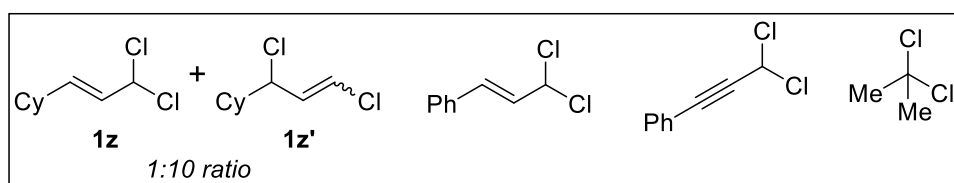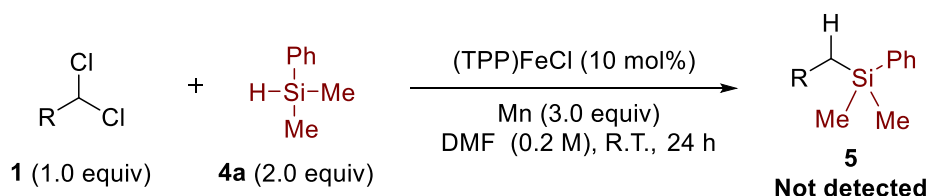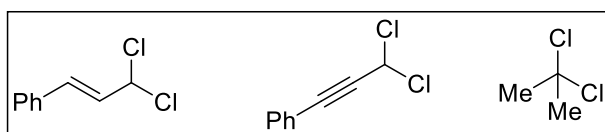



### III. Effect of Reaction Parameters

Reactions in Table S1 were conducted based on the following procedure:

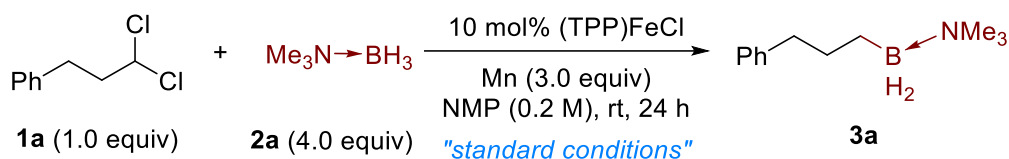

Inside the glovebox under N<sub>2</sub> atmosphere, (TPP)FeCl (7.1 mg, 0.010 mmol, 0.10 equiv), Mn (16.6 mg, 0.3 mmol, 3.0 equiv) and *N*-Methylpyrrolidone (NMP) (0.5 mL) were added to an oven-dried 4 mL vial equipped with a magnetic stir bar. The reaction mixture was stirred (800 r/min) at room temperature for 0.5 hours. Next, (3,3-dichloropropyl)benzene (18.8 mg, 0.1 mmol, 1.0 equiv) and trimethylamine borane (29.2 mg, 0.40 mmol, 4.0 equiv) were added sequentially, The vial was quickly sealed with a PTFE septum cap. Then the vial was taken out of the glovebox, and stirred (800 r/min) at 25 °C for 24 hours.

**Work-up:** The reaction mixture was diluted with 0.5 mL ether, followed by the addition of the internal standard 1,3,5-trimethoxybenzene (0.10 mmol). The reaction solvent was removed by concentration under reduced pressure. The residue was subjected to flash column chromatography with petroleum ether (PE) and ethyl acetate (EA) as the eluent to afford the desired borane products.

**Table S1.** Effect of reaction parameters of B-H insertion<sup>a</sup>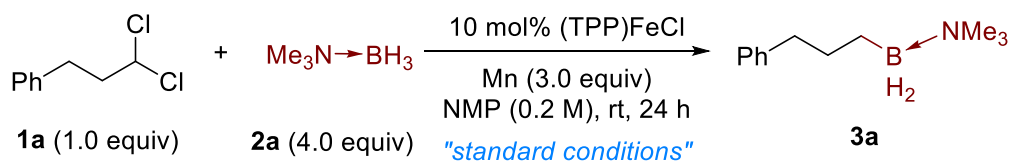

| entry | variations from "standard condition"                          | yield (%) <sup>b</sup> |
|-------|---------------------------------------------------------------|------------------------|
| 1     | none                                                          | 70                     |
| 2     | no Fe(TPP)Cl                                                  | <2                     |
| 3     | no Mn                                                         | <2                     |
| 4     | Fe( <i>p</i> -OMeTPP)Cl, instead of Fe(TPP)Cl                 | 68                     |
| 5     | Fe( <i>p</i> -ClTPP)Cl, instead of Fe(TPP)Cl                  | 70                     |
| 6     | Fe(PC), instead of Fe(TPP)Cl                                  | 64                     |
| 7     | FeCl <sub>2</sub> or FeBr <sub>3</sub> , instead of Fe(TPP)Cl | <2                     |
| 8     | Co(TPP), instead of Fe(TPP)Cl                                 | 15                     |
| 9     | Co(PC), instead of Fe(TPP)Cl                                  | 10                     |
| 10    | 3.0 equiv Zn, instead of Mn                                   | 61                     |
| 11    | 3.0 equiv Mg, instead of Mn                                   | 12                     |
| 12    | DMF, instead of NMP                                           | 56                     |
| 13    | DMAc, instead of NMP                                          | 39                     |
| 14    | THF or EA, instead of NMP                                     | <2                     |
| 15    | 2.0, instead of 3.0, equiv BH <sub>3</sub> NMe <sub>3</sub>   | 46                     |
| 16    | 20 mol%, instead of 10 mol%, Fe(TPP)Cl                        | 71                     |
| 17    | with 1.0 equiv DMAP                                           | <2                     |
| 18    | with 1.0 equiv Et <sub>3</sub> N                              | 64                     |

<sup>a</sup>Reaction conducted under N<sub>2</sub> on 0.10 mmol scale for 24 h, and all data are the average of two experiments.

<sup>b</sup>Yields were determined via <sup>1</sup>H NMR analysis with 1,3,5-trimethoxybenzene as the internal standard.

Reactions in Table S2 were conducted based on the following procedure:

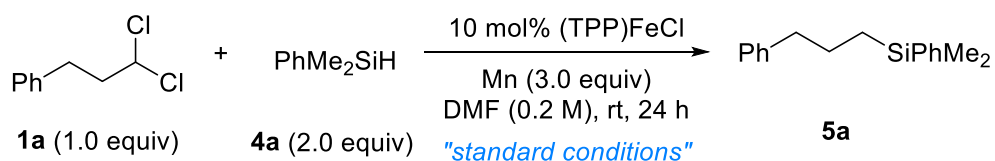

Inside the glovebox under N<sub>2</sub> atmosphere, Fe(TPP)Cl (7.1 mg, 0.010 mmol, 0.10 equiv), Mn (16.5 mg, 0.3 mmol, 3.0 equiv) and *N,N*-dimethylformamide (DMF) (0.5 mL) were added to an oven-dried 4 mL vial equipped with a magnetic stir bar. The reaction mixture was stirred (800 r/min) at room temperature for 0.5 hours. Next, (3,3-dichloropropyl)benzene (18.8 mg, 0.1 mmol, 1.0 equiv) and dimethylphenylsilane (27.2 mg, 0.20 mmol, 2.0 equiv) were added sequentially, The vial was quickly sealed with a PTFE septum cap. Then the vial was taken out of the glovebox, and stirred (800 r/min) at 25 °C for 24 hours.

**Work-up:** The reaction mixture was diluted with 1.0 mL ether, followed by the addition of the internal standard 1,3,5-trimethoxybenzene (0.10 mmol). The reaction solvent was removed by concentration under reduced pressure. The residue was subjected to flash column chromatography with petroleum ether (PE) and ethyl acetate (EA) as the eluent to afford the desired silane products.

**Table S2.** Effect of reaction parameters of Si-H insertion<sup>a</sup>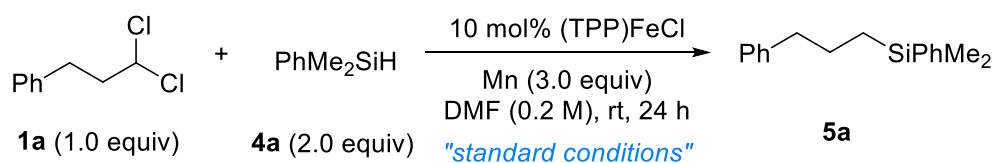

| entry | variations from "standard condition"            | yield (%) <sup>b</sup> |
|-------|-------------------------------------------------|------------------------|
| 1     | none                                            | 70                     |
| 2     | no Fe(TPP)Cl                                    | <2                     |
| 3     | no Mn                                           | <2                     |
| 4     | Fe( <i>p</i> -OMeTPP)Cl, instead of Fe(TPP)Cl   | 93                     |
| 5     | Fe( <i>p</i> -ClTPP)Cl, instead of Fe(TPP)Cl    | 63                     |
| 6     | Co(TPP), instead of Fe(TPP)Cl                   | <2                     |
| 7     | Co(PC), instead of Fe(TPP)Cl                    | <2                     |
| 8     | 3.0 equiv Zn, instead of Mn                     | 26                     |
| 9     | 3.0 equiv Mg, instead of Mn                     | <2                     |
| 10    | DMAc, instead of DMF                            | 95                     |
| 11    | MeCN, instead of NMP                            | <2                     |
| 12    | THF or EA, instead of NMP                       | <2                     |
| 13    | Reaction at 0 °C                                | 47                     |
| 14    | Reaction at 60 °C                               | 67                     |
| 15    | (3,3-dibromopropyl)benzene instead of <b>1a</b> | 80                     |

<sup>a</sup>Reaction conducted under N<sub>2</sub> on 0.10 mmol scale for 24 h, and all data are the average of two experiments.

<sup>b</sup>Yields were determined via <sup>1</sup>H NMR analysis with 1,3,5-trimethoxybenzene as the internal standard.

## IV. Preliminary Mechanistic Study

### Deuterium-labelling experiment:

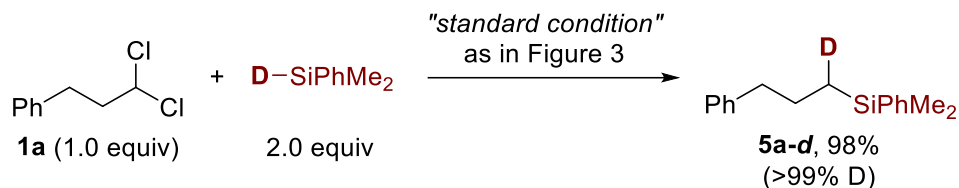

The product **dimethyl(phenyl)(3-phenylpropyl-1-d)silane** (**5a-d**)<sup>12</sup> was prepared according to the **GP-3** from (dichloromethyl)benzene and dimethyl(phenyl)silane-*d*, purified by flash column chromatography on silica gel: hexane, white solid. 50.0 mg, 98% yield, >99%D.

<sup>1</sup>H NMR (500 MHz, Chloroform-*d*)  $\delta$  7.51 – 7.46 (m, 2H), 7.37 – 7.31 (m, 3H), 7.29 – 7.23 (m, 2H), 7.19 – 7.10 (m, 3H), 2.68 – 2.56 (m, 2H), 1.71 – 1.59 (m, 2H), 0.77 (tt,  $J = 8.5, 2.1$  Hz, 1H), 0.25 (s, 6H).

<sup>13</sup>C NMR (126 MHz, Chloroform-*d*)  $\delta$  142.5, 139.4, 133.5, 128.8, 128.5, 128.2, 127.7, 125.6, 39.8, 25.9, 15.1 (t,  $J = 18.0$  Hz) -3.1.

### Exchange experiment:

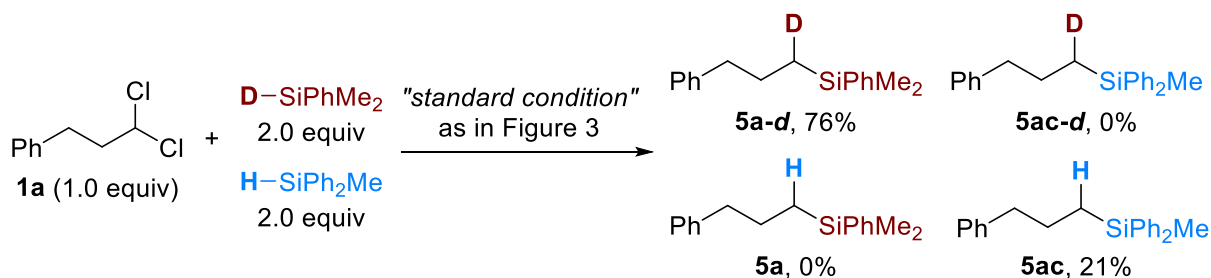

Inside the glovebox under  $N_2$  atmosphere, (TPP)FeCl (7.1 mg, 0.010 mmol, 0.10 equiv), **Mn** (16.5 mg, 0.3 mmol, 3.0 equiv) and *N,N*-dimethylformamide (DMF) (0.5 mL) were added to an oven-dried 4 mL vial equipped with a magnetic stir bar. The reaction mixture was stirred (800 r/min) at room temperature for 0.5 hours. Next, (3,3-dichloropropyl)benzene (18.8 mg, 0.1 mmol, 1.0 equiv), dimethyl(phenyl)silane-*d* (27.2 mg, 0.20 mmol, 2.0 equiv) and methyl(diphenyl)silane (39.6 mg, 0.20 mmol, 2.0 equiv) were added sequentially. The vial was quickly sealed with a PTFE septum cap. Then the vial was taken out of the glovebox, and stirred (800 r/min) at 25 °C for 24 hours.

**Work-up:** The reaction mixture was diluted with 1.0 mL ether, followed by the addition of the internal standard 1,3,5-trimethoxybenzene (0.10 mmol). The reaction solvent was removed by concentration under reduced pressure. The residue was subjected to flash column chromatography with PE as the eluent to afford **5a-d** (19.4 mg, 76%) and **5ac** (6.6 mg, 21%).

### Parallel KIE experiment

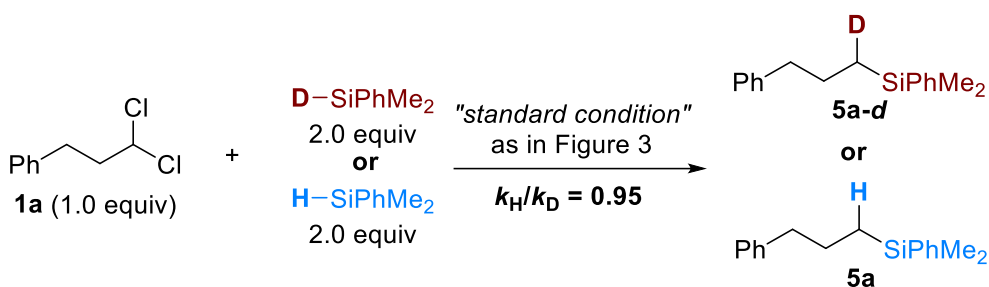

Inside the glovebox under  $\text{N}_2$  atmosphere, (TPP)FeCl (14.2 mg, 0.020 mmol, 0.10 equiv), Mn (33.3 mg, 0.6 mmol, 3.0 equiv) and N,N-dimethylformamide (DMF) (1 mL) were added to an oven-dried 4 mL vial equipped with a magnetic stir bar. The reaction mixture was stirred (800 r/min) at room temperature for 0.5 hours. Next, (3,3-dichloropropyl)benzene (38 mg, 0.2 mmol, 1.0 equiv), 1,3,5-trimethoxybenzene (0.10 mmol, 16.8 mg) as Internal standard, dimethyl(phenyl)silane (54.4 mg, 0.40 mmol, 2.0 equiv) or dimethyl(phenyl)silane-*d* (54.8 mg, 0.40 mmol, 2.0 equiv) were added sequentially, The vial was quickly sealed with a PTFE septum cap. The vial was stirred (800 r/min) at 25 °C in the glovebox.

**Work-up:** The 0.05 ml reaction solution was separated from vial with every 6 min, was diluted with 1.0 mL ether. The reaction solvent was removed by concentration under reduced pressure. The residue was subjected to short flash column chromatography with PE:EA (5:1) as the eluent to determine the  $^1\text{H}$  NMR yield of silane product.

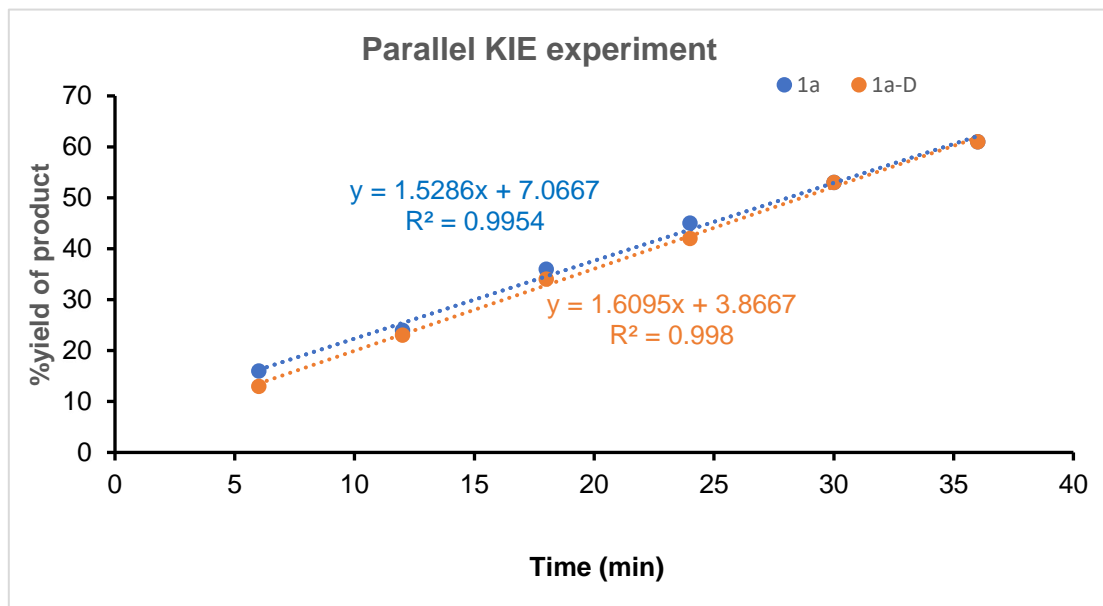

**Figure S1.** Parallel KIE experiment

$$k_{\text{H}}/k_{\text{D}} = 1.5286/1.6095 = 0.95$$

### One-pot competition KIE experiment

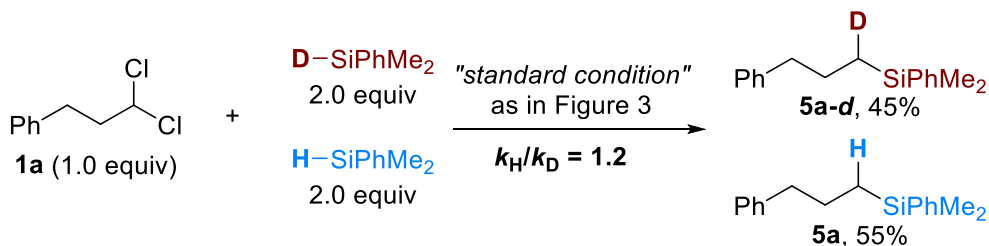

Inside the glovebox under  $\text{N}_2$  atmosphere, (TPP)FeCl (14.2 mg, 0.020 mmol, 0.10 equiv), Mn (33.3 mg, 0.6 mmol, 3.0 equiv) and *N,N*-dimethylformamide (DMF) (1 mL) were added to an oven-dried 4 mL vial equipped with a magnetic stir bar. The reaction mixture was stirred (800 r/min) at room temperature for 0.5 hours. Next, (3,3-dichloropropyl)benzene (38 mg, 0.2 mmol, 1.0 equiv), dimethyl(phenyl)silane (54.4 mg, 0.40 mmol, 2.0 equiv) and dimethyl(phenyl)silane-*d* (54.8 mg, 0.40 mmol, 2.0 equiv) were added sequentially, The vial was quickly sealed with a PTFE septum cap. The vial was stirred (800 r/min) at 25 °C in the glovebox for 24 h.

**Work-up:** The reaction mixture was diluted with 1.0 mL ether, followed by the addition of the internal standard 1,3,5-trimethoxybenzene (0.10 mmol). The reaction solvent was removed by concentration under reduced pressure. The residue was subjected to flash column chromatography with PE as the eluent to obtain the mixed product of **1a** and **1a-D**.

#### Control experiments:

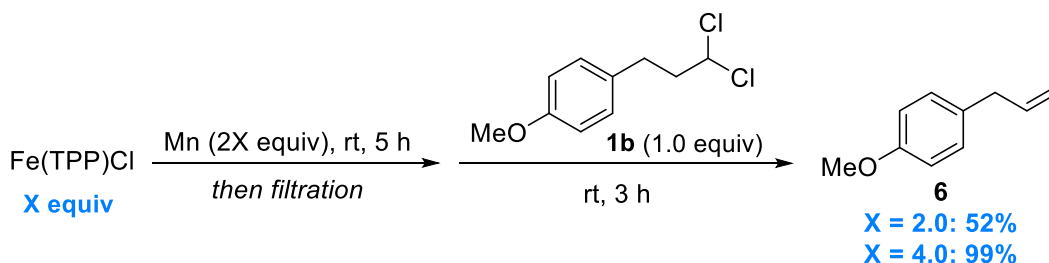

Inside the glovebox under  $\text{N}_2$  atmosphere, (TPP)FeCl (0.05x mmol, x equiv) or, Mn (0.1x mmol, 2x equiv) and *N,N*-dimethylformamide (DMF) (1 mL) were added to an oven-dried 4 mL vial equipped with a magnetic stir bar. The reaction mixture was stirred (800 r/min) at room temperature for 5 hours. Filter of the reaction mixture to remove excess Mn powder. Next, 1-(3,3-dichloropropyl)-4-methoxybenzene (11.1 mg, 0.05 mmol, 1.0 equiv) were added to the filtrate sequentially, the vial was quickly sealed with a PTFE septum cap. The vial was stirred (800 r/min) at 25 °C in the glovebox for 3 h. Finally, 2N HCl solution (0.5 ml) was added to the reaction mixture. which was subsequently extracted by diethyl ether (1 ml\*3). The combined organic layers were dried over  $\text{Na}_2\text{SO}_4$ , evaporated under reduced pressure to determine product by crude  $^1\text{H}$  NMR and purified by flash column chromatography on silica gel: hexane as eluent to obtain products.

## V. References

1. (a) Chen, J.; Lin, J. H.; Xiao, J. C., Halogenation through Deoxygenation of Alcohols and Aldehydes. *Org. Lett.* **2018**, *20*(10), 3061-3064; (b) Hazrati, H.; Oestreich, M., Copper-Catalyzed Double C(sp<sup>3</sup>)-Si Coupling of Geminal Dibromides: Ionic-to-Radical Switch in the Reaction Mechanism. *Org. Lett.* **2018**, *20*(17), 5367-5369; (c) Hong, K.; Liu, X.; Morken, J. P., Simple access to elusive alpha-boryl carbanions and their alkylation: an umpolung construction for organic synthesis. *J. Am. Chem. Soc.* **2014**, *136*(10), 10581-10584; (d) Liu, H. L.; Wang, X.; Gao, K.; Wang, Z., Catalytic Diastereo- and Enantioselective Cyclopropanation of gem-Dihaloalkanes and Terminal Olefins. *Angew. Chem. Int. Ed.* **2023**, *62*(28), e202305987; (e) Ni, J.; Xia, X.; Gu, D.; Wang, Z., Ti-Catalyzed Modular Ketone Synthesis from Carboxylic Derivatives and gem-Dihaloalkanes. *J. Am. Chem. Soc.* **2023**, *145*(27), 14884-14893.
2. Sato, I.; Yamashita, Y.; Kobayashi, S., Alkylpotassium-Catalyzed Benzylic C-H Alkylation of Alkylarenes with Alkenes. *Synthesis* **2018**, *51*(01), 240-250.
3. Xue, W.; Oestreich, M., Copper-Catalyzed Decarboxylative Radical Silylation of Redox-Active Aliphatic Carboxylic Acid Derivatives. *Angew. Chem. Int. Ed.* **2017**, *56*(38), 11649-11652.
4. Matsumoto, A.; Shiozaki, Y.; Sakurai, S.; Maruoka, K., Synthesis of Functionalized Aliphatic Acid Esters via the Generation of Alkyl Radicals from Silylperoxyacetals. *Chem. Asian J.* **2021**, *16*(17), 2431-2434.
5. Yuan, Y.; Gu, Y.; Wang, Y. E.; Zheng, J.; Ji, J.; Xiong, D.; Xue, F.; Mao, J., One-Pot Rapid Access to Benzyl Silanes, Germanes, and Stannanes from Toluenes Mediated by a LiN(SiMe<sub>3</sub>)<sub>2</sub>/CsCl System. *J. Org. Chem.* **2022**, *87*(21), 13907-13918.
6. Liu, Z.; Huo, J.; Fu, T.; Tan, H.; Ye, F.; Hossain, M. L.; Wang, J., Palladium(0)-catalyzed C(sp<sup>3</sup>)-Si bond formation via formal carbene insertion into a Si-H bond. *Chem. Commun.* **2018**, *54*(81), 11419-11422.
7. Huang, Z. D.; Ding, R.; Wang, P.; Xu, Y. H.; Loh, T. P., Palladium-catalyzed silylation reaction between benzylic halides and silylboronate. *Chem. Commun.* **2016**, *52*(32), 5609-5612.
8. Rubin, M.; Schwier, T.; Gevorgyan, V., Highly efficient B(C<sub>6</sub>F<sub>5</sub>)<sub>3</sub>-catalyzed hydrosilylation of olefins. *J. Org. Chem.* **2002**, *67*(6), 1936-1940.
9. Yang, X.; Wang, C., Diverse Fates of β-Silyl Radical under Manganese Catalysis: Hydrosilylation and Dehydrogenative Silylation of Alkenes. *Chin. J. Chem.* **2018**, *36*(11), 1047-1051.
10. Seo, S.; Jung, J.; Kim, H., Palladium-Catalyzed Hydrosilylation of Unactivated Alkenes and Conjugated Dienes with Tertiary Silanes Controlled by Hemilabile Hybrid P,O Ligand. *Angew. Chem. Int. Ed.* **2023**, *62*(28), e202303853.
11. Arii, H.; Iwanami, Y.; Nakane, D.; Masuda, H.; Matsumoto, J.; Shiragami, T.; Mochida, K.; Kawashima, T., Synthesis of Germacyclic Compounds by Cyclization and Annulation Reactions Utilizing In Situ Generated Germyl Cations. *Organometallics* **2021**, *40*(9), 1363-1370.
12. Zhang, L.; DeMuyne, B. M.; Paneque, A. N.; Rutherford, J. E.; Nagib, D. A., Carbene Reactivity from Alkyl and Aryl Aldehydes. *Science* **2022**, *377*, 649-654.



## VI. NMR Spectra

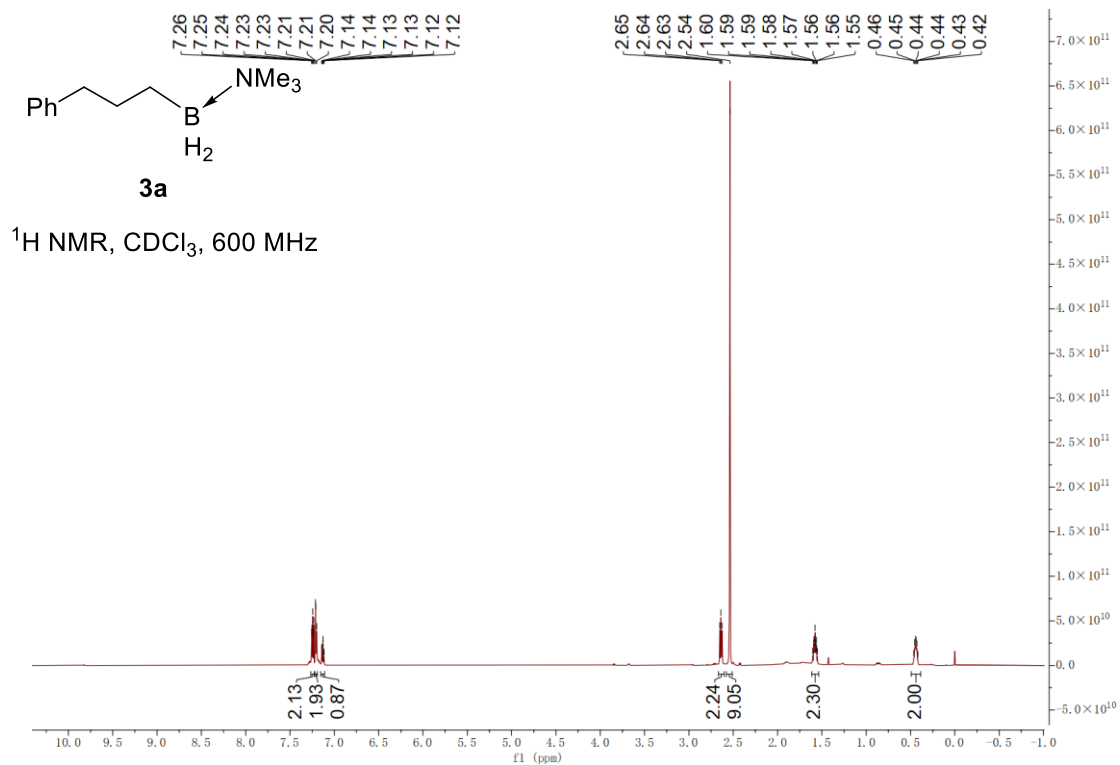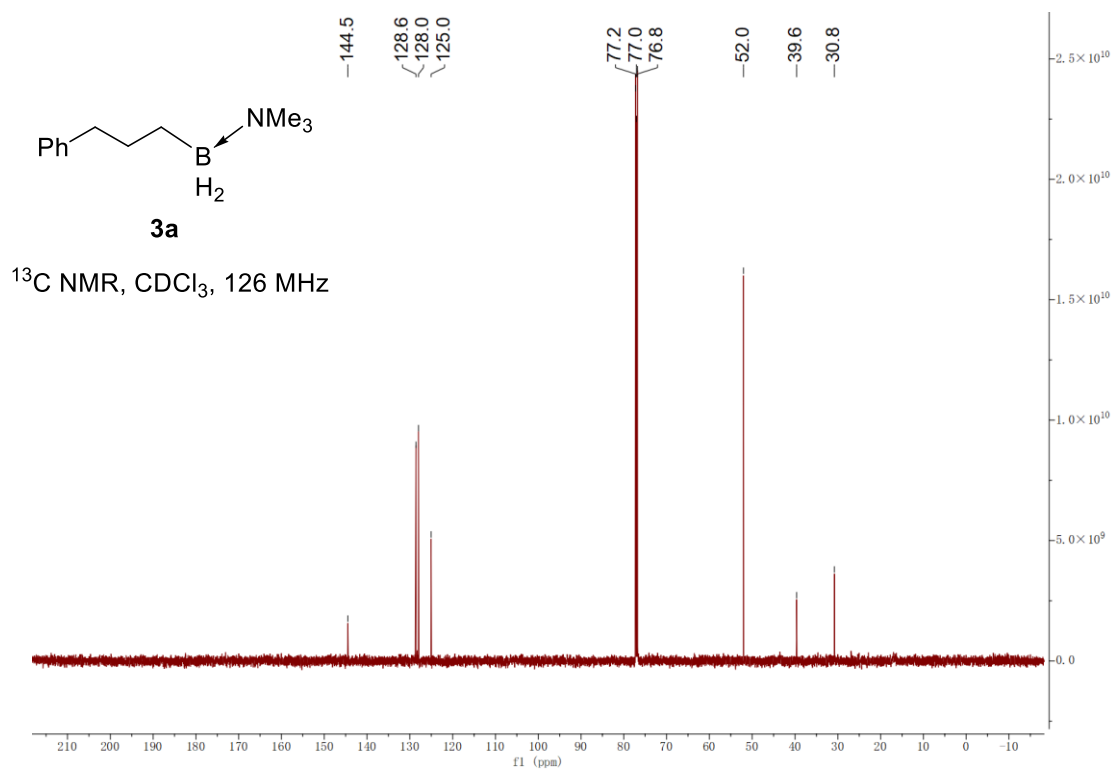

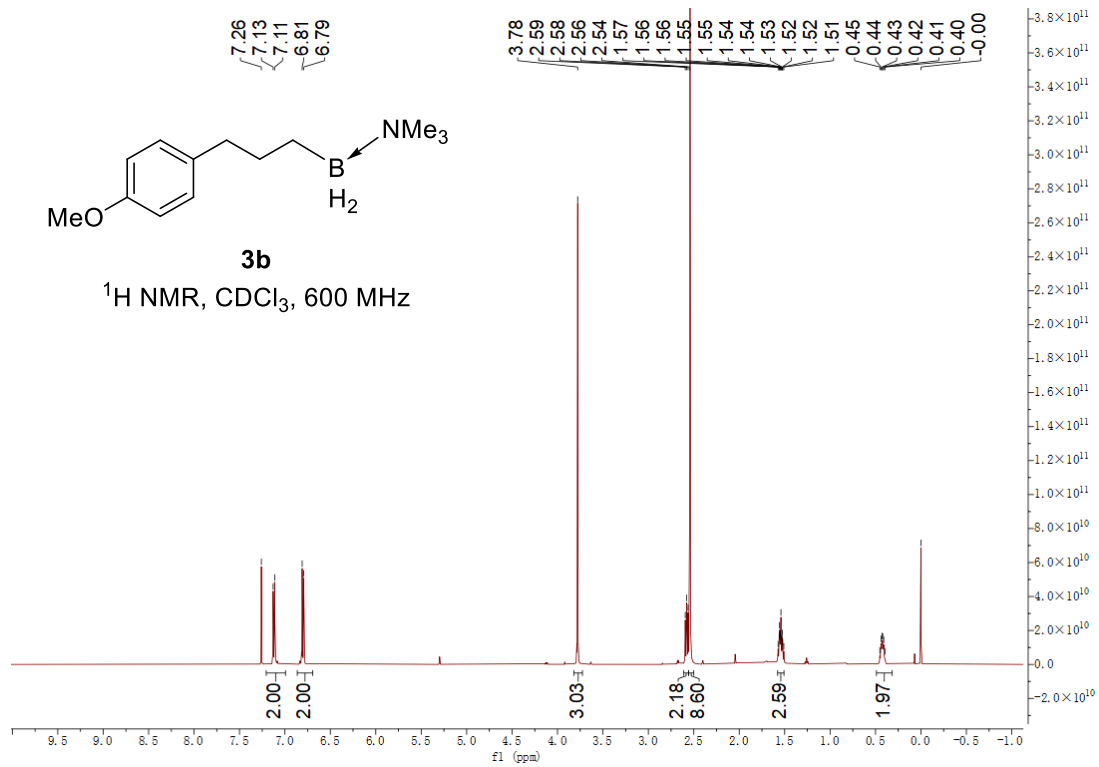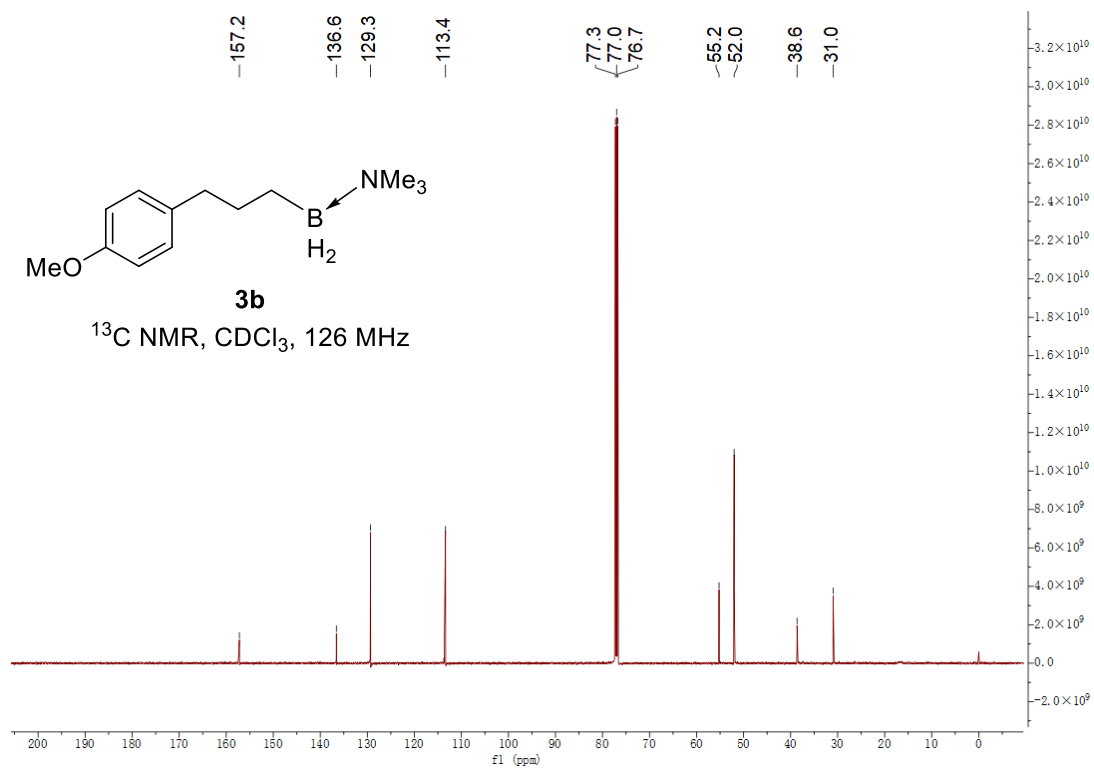

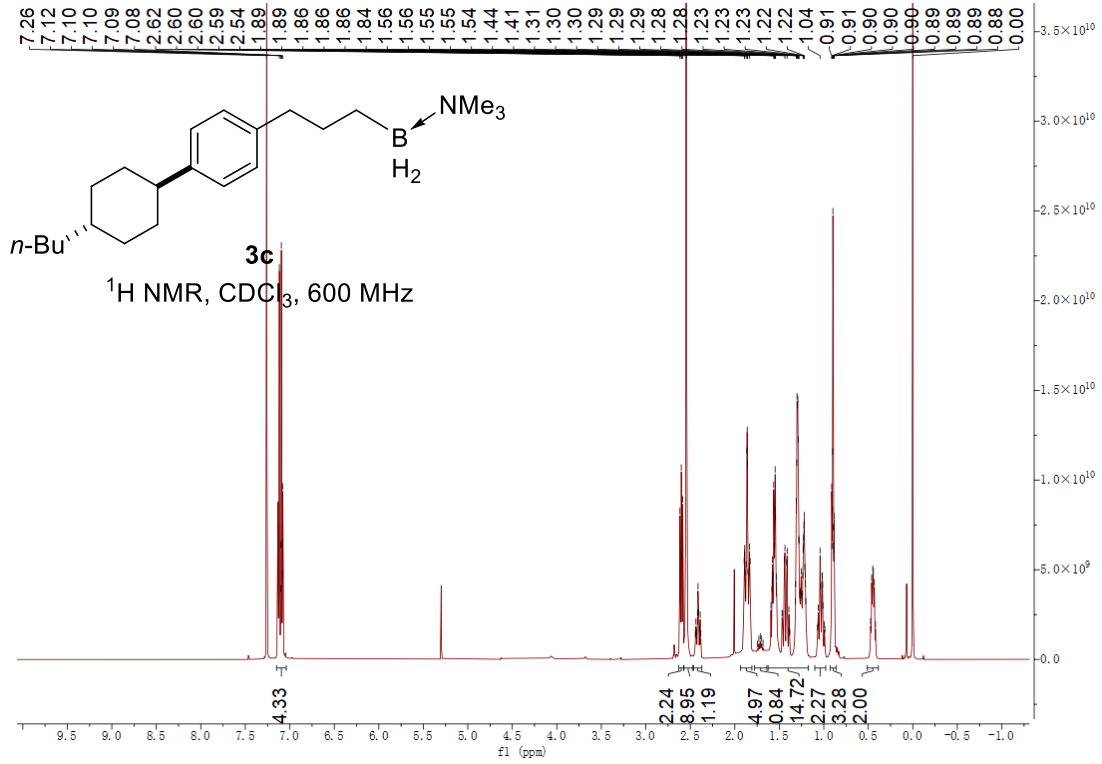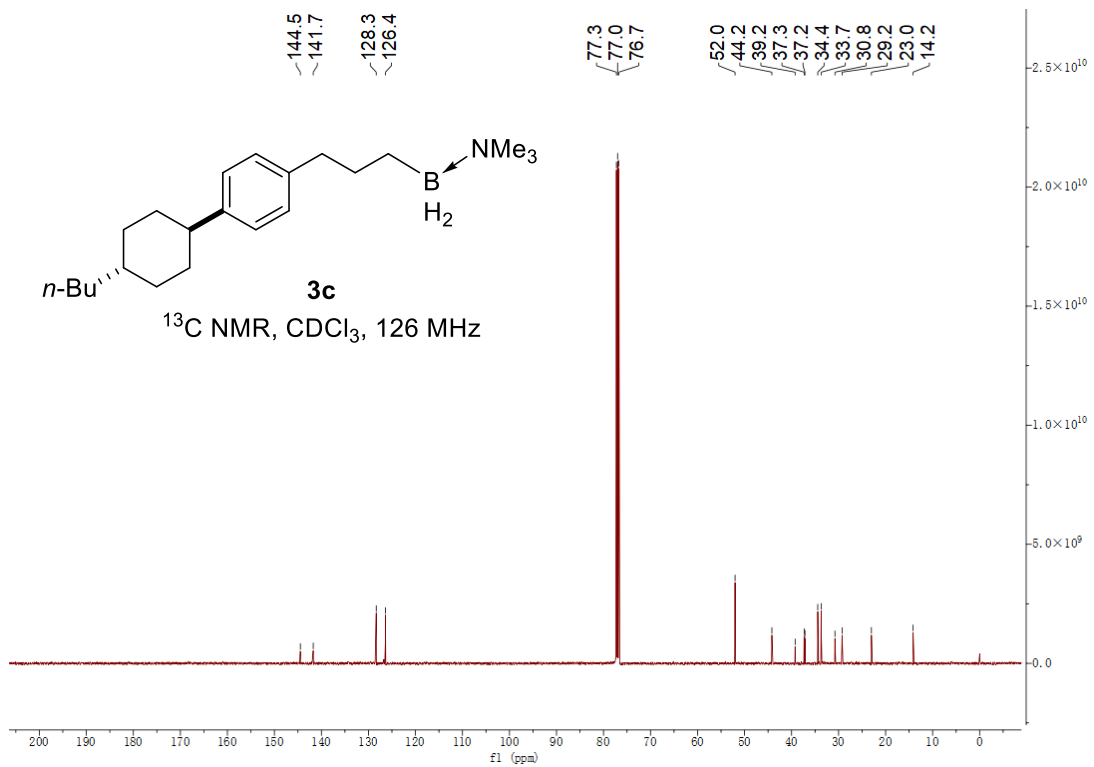

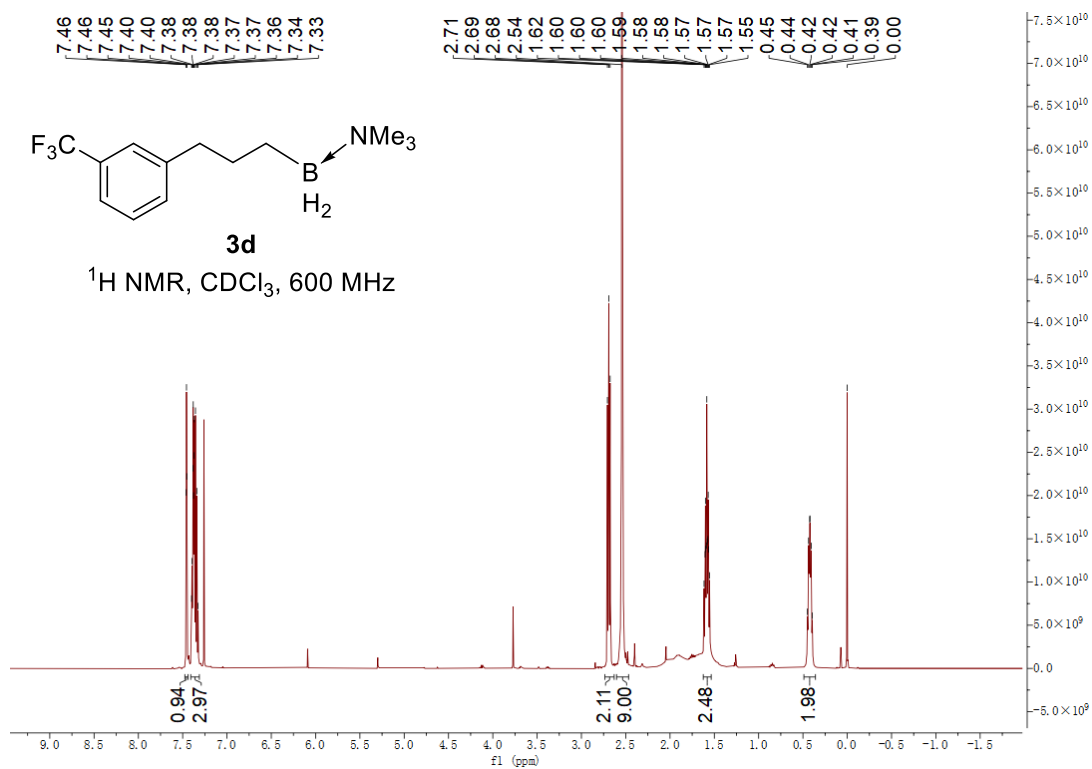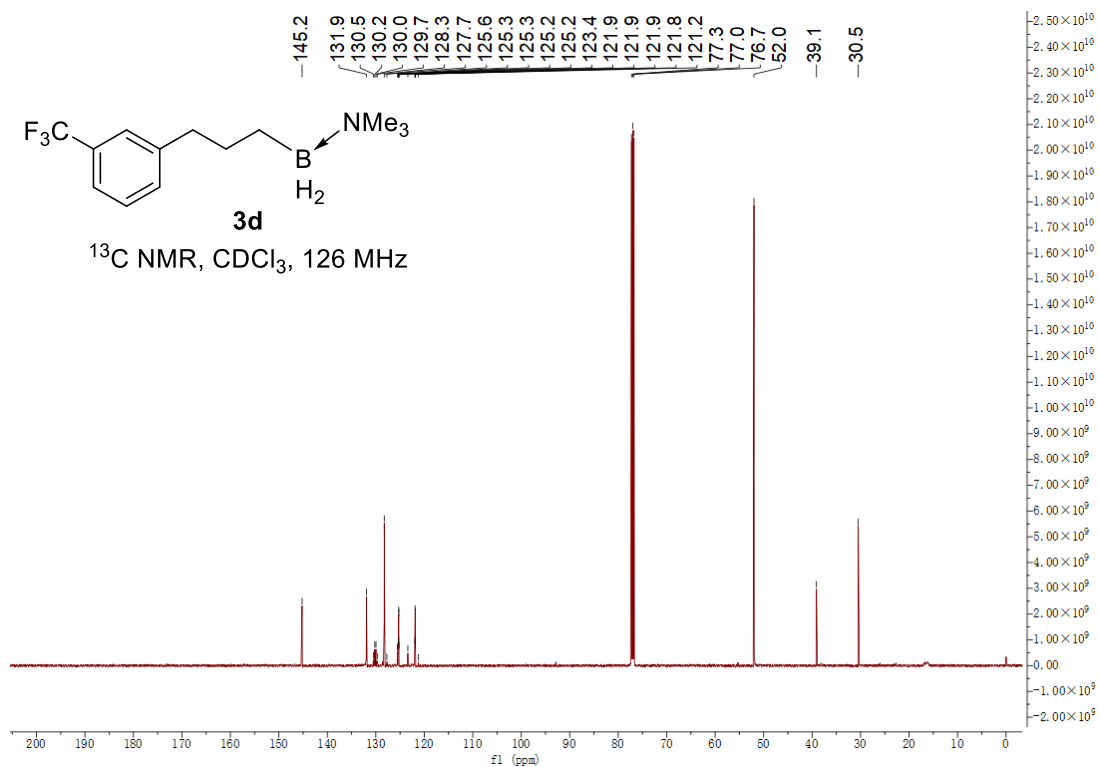

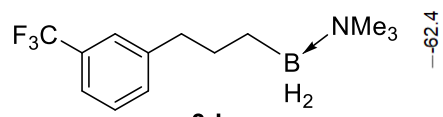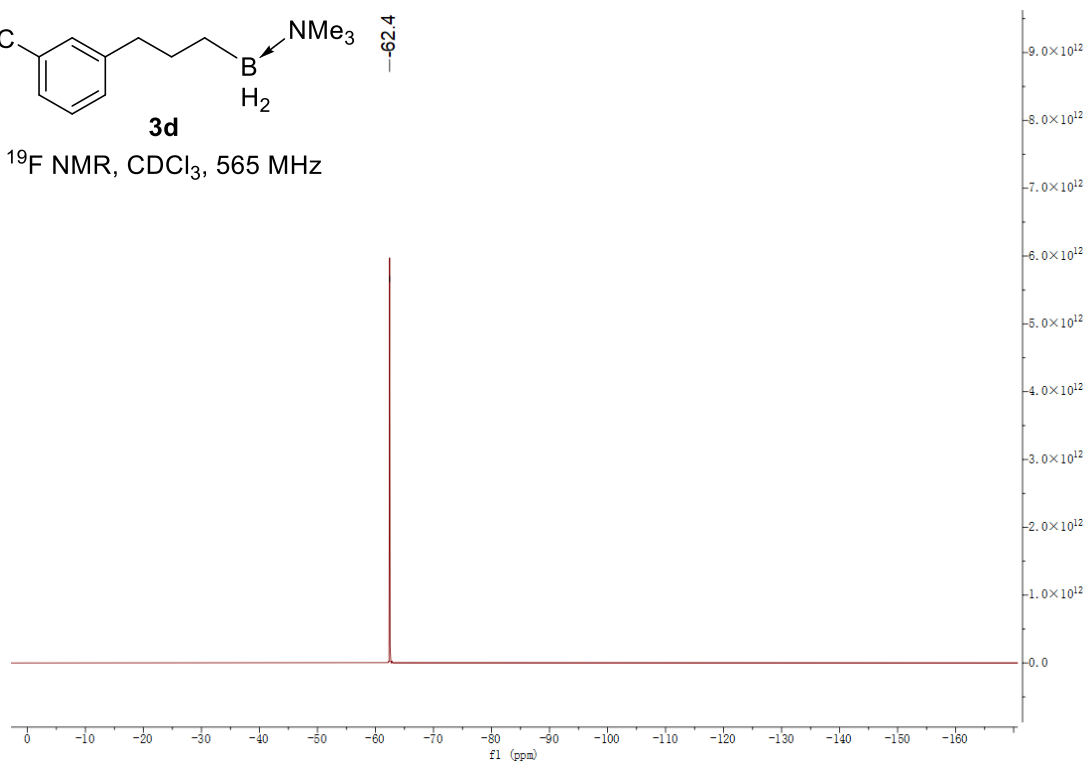

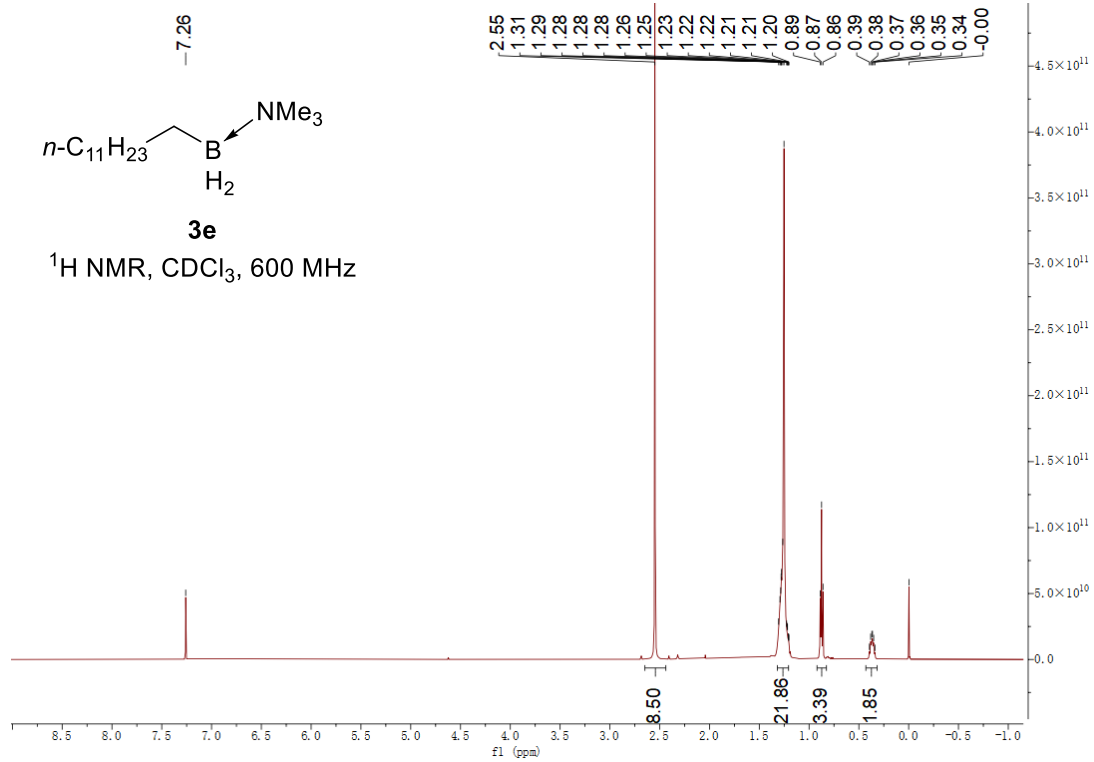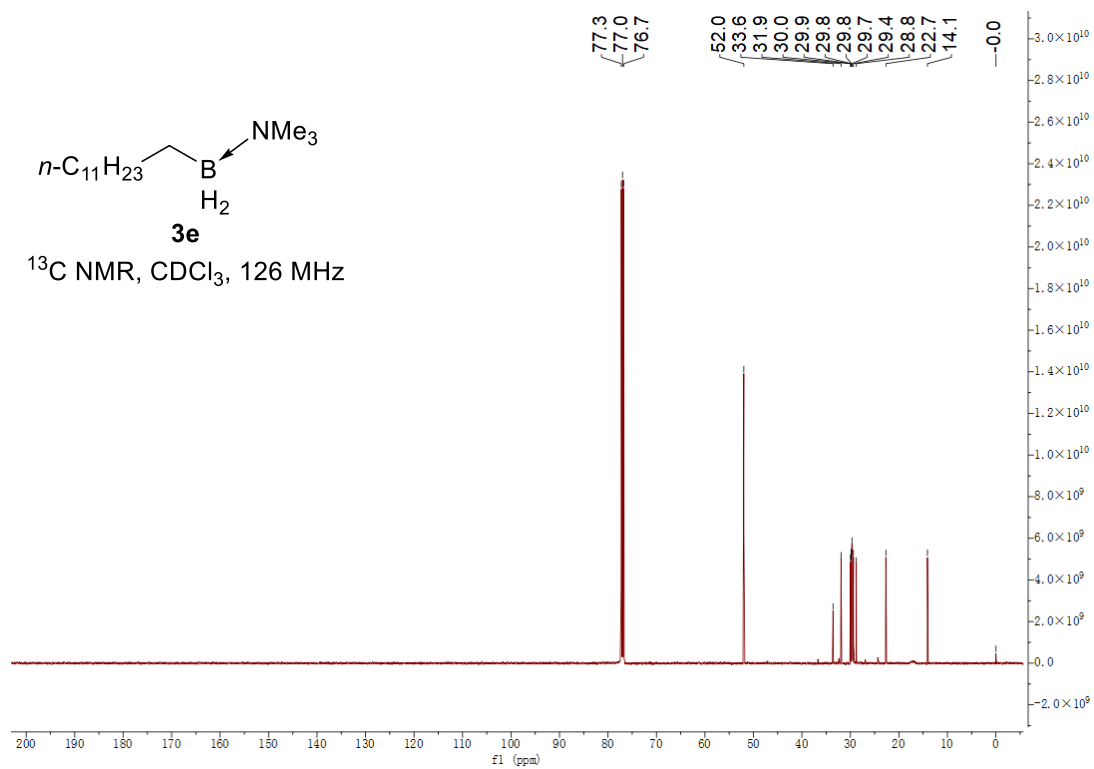

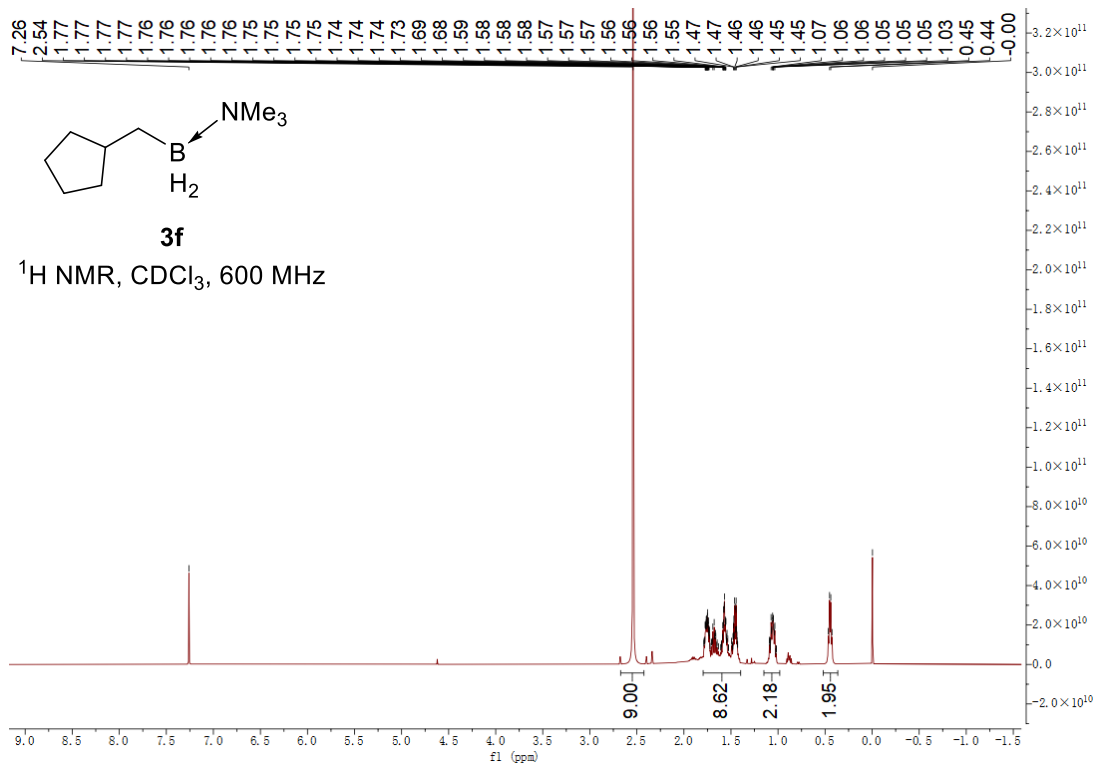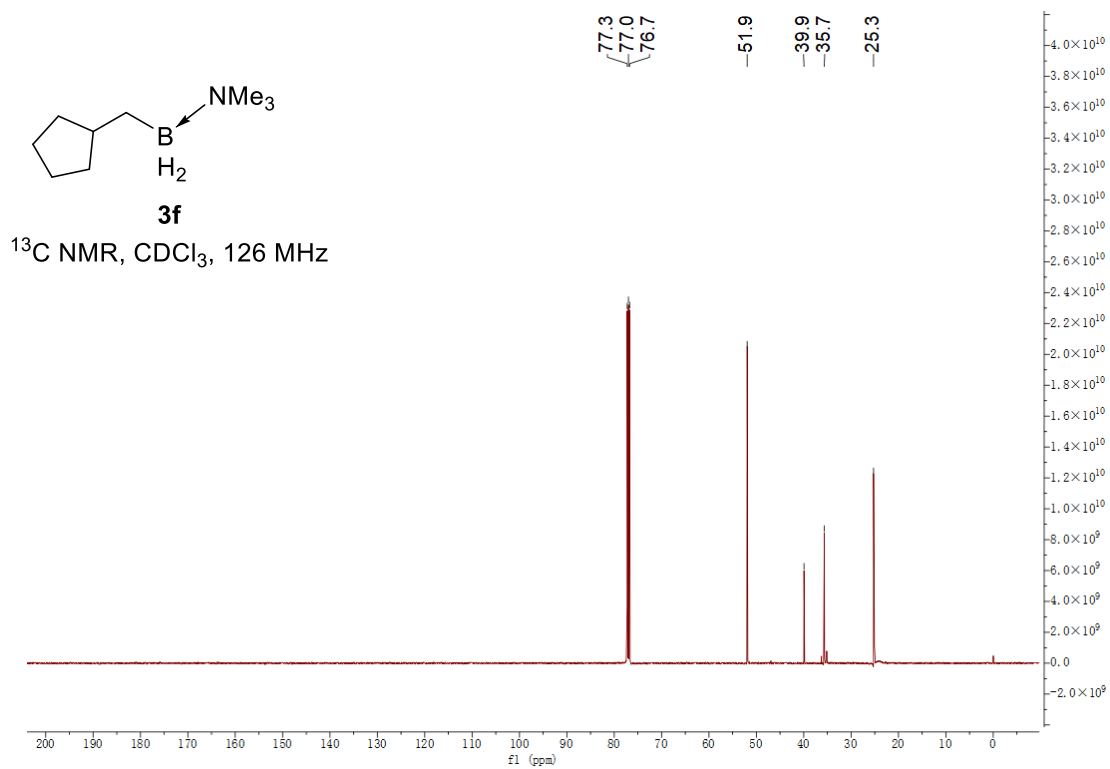

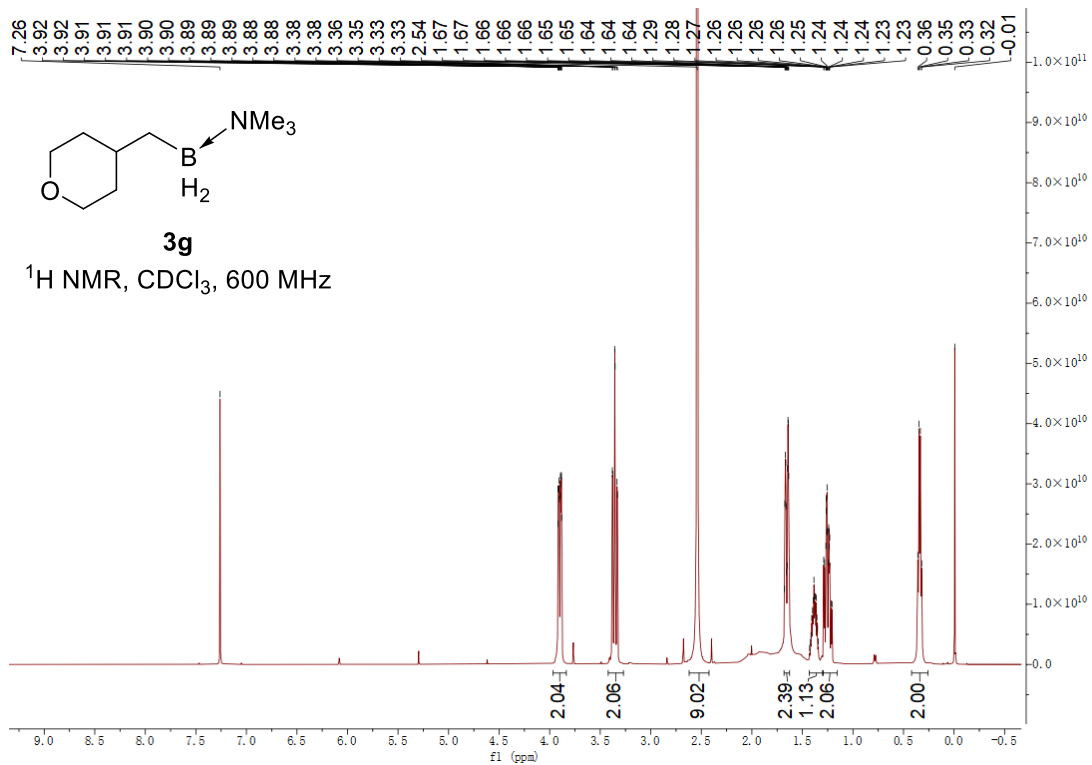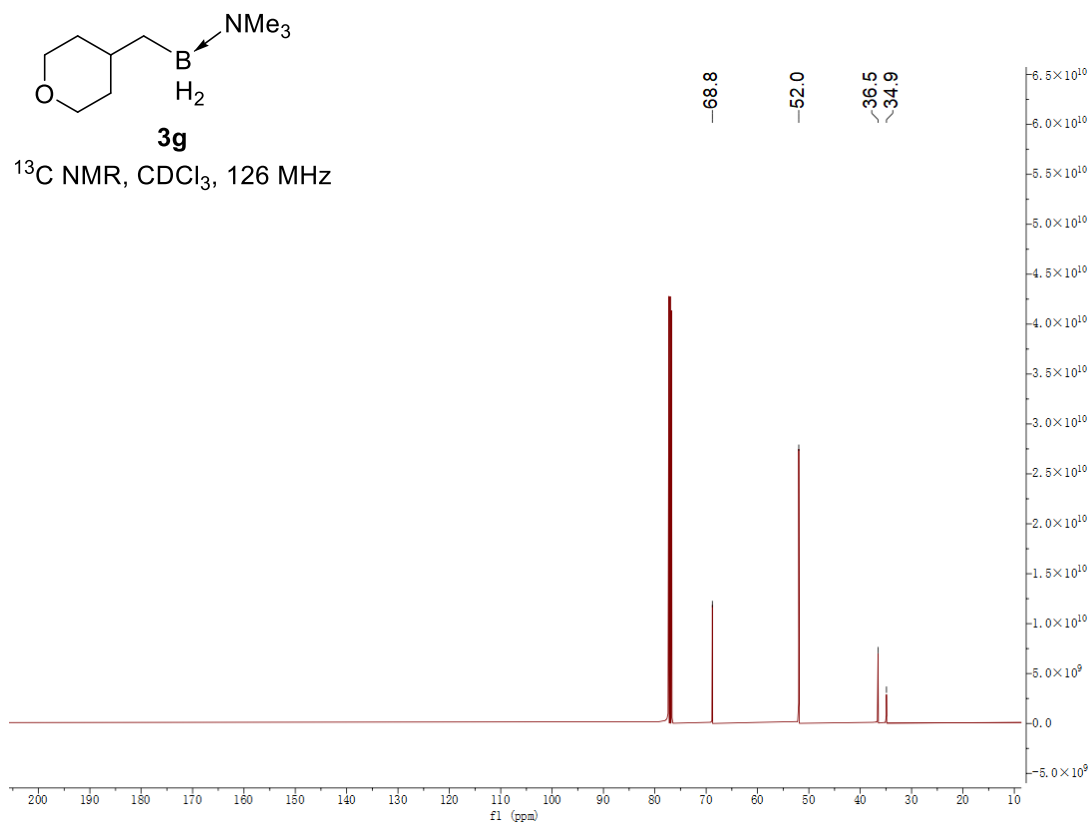



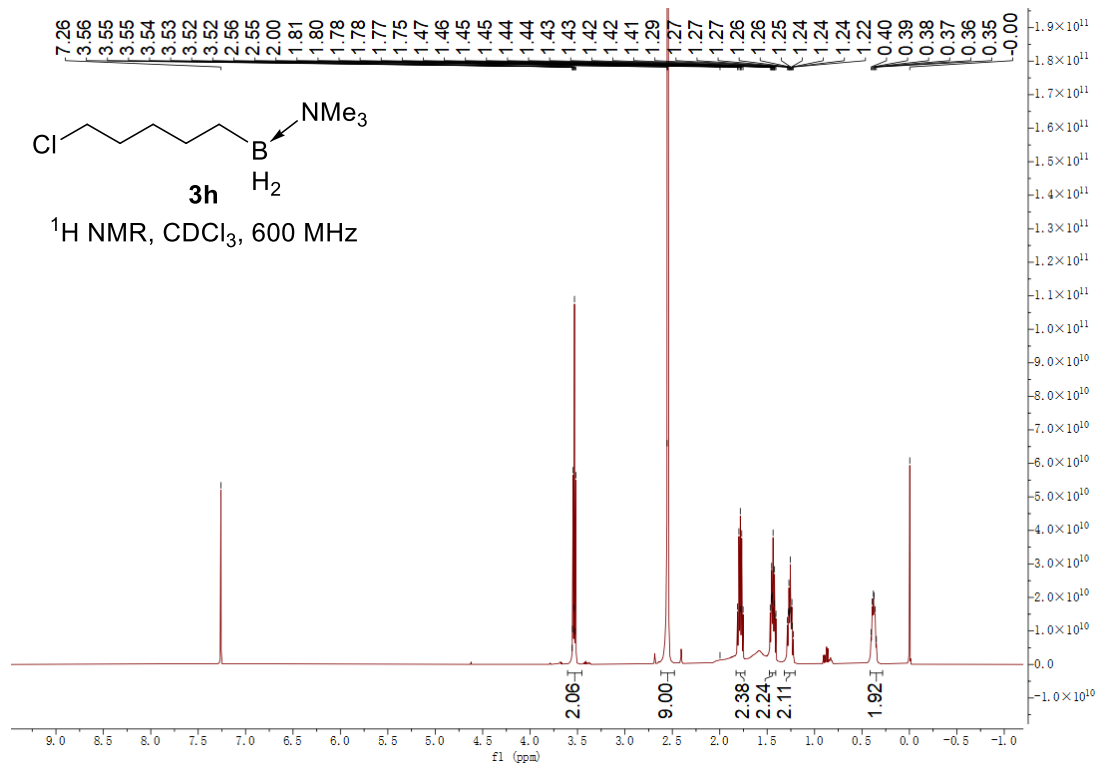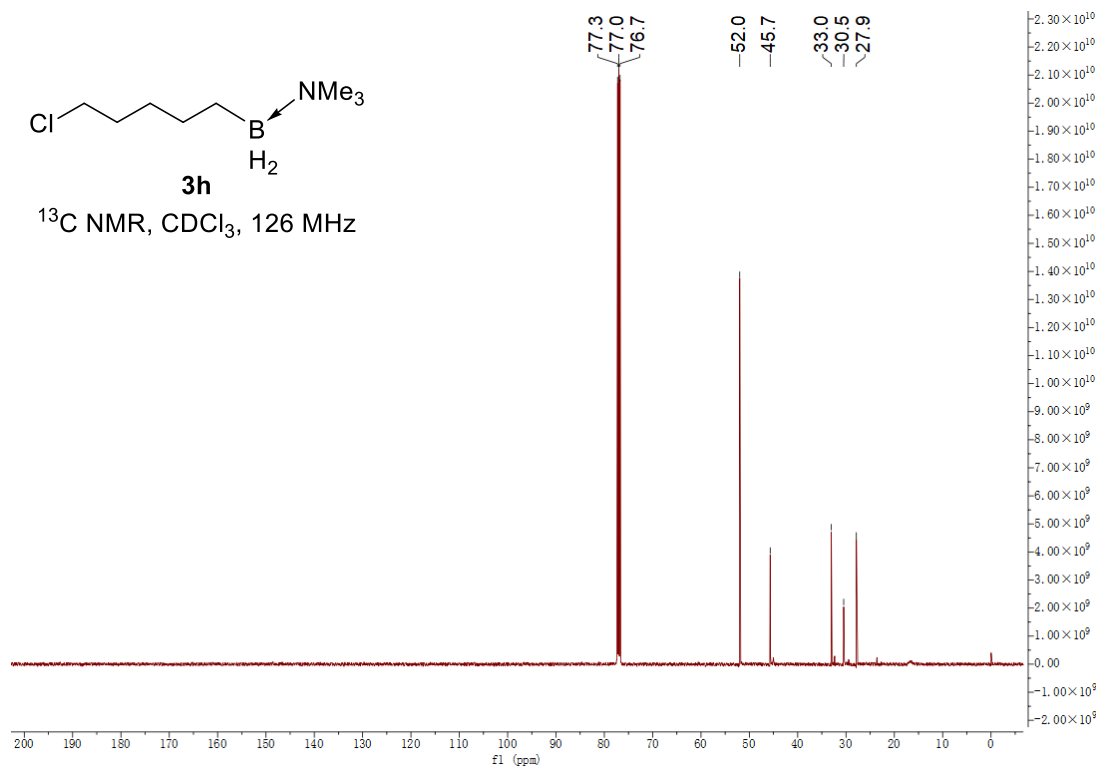

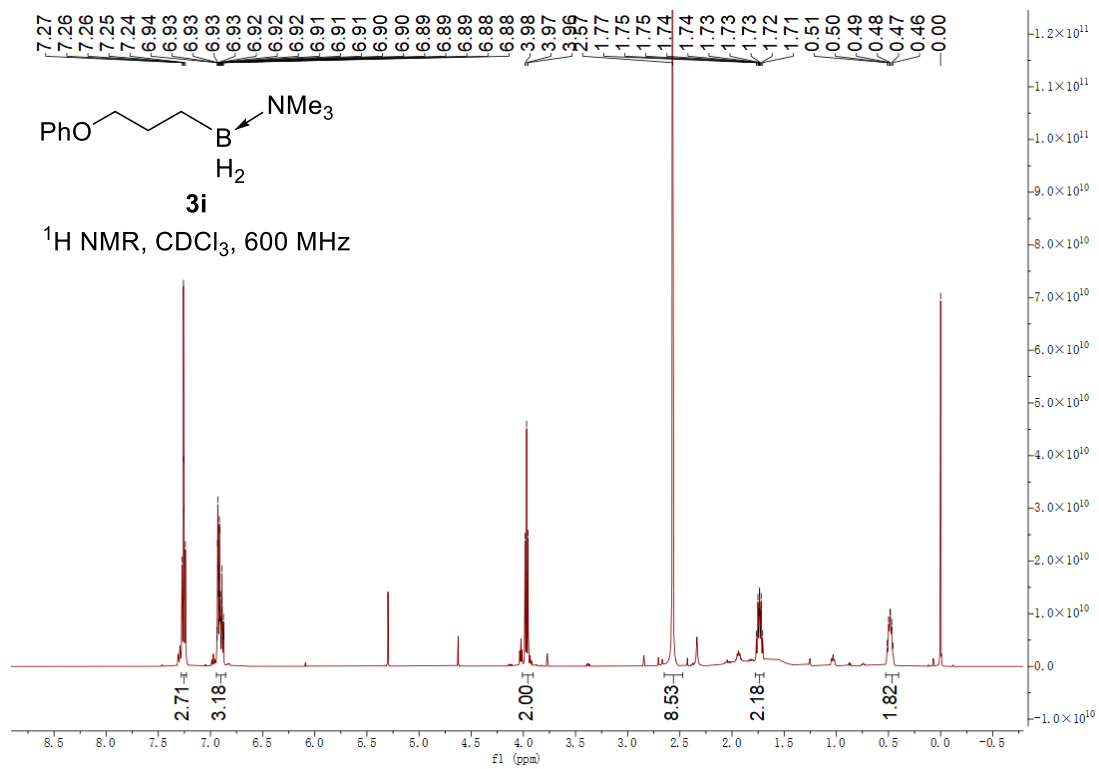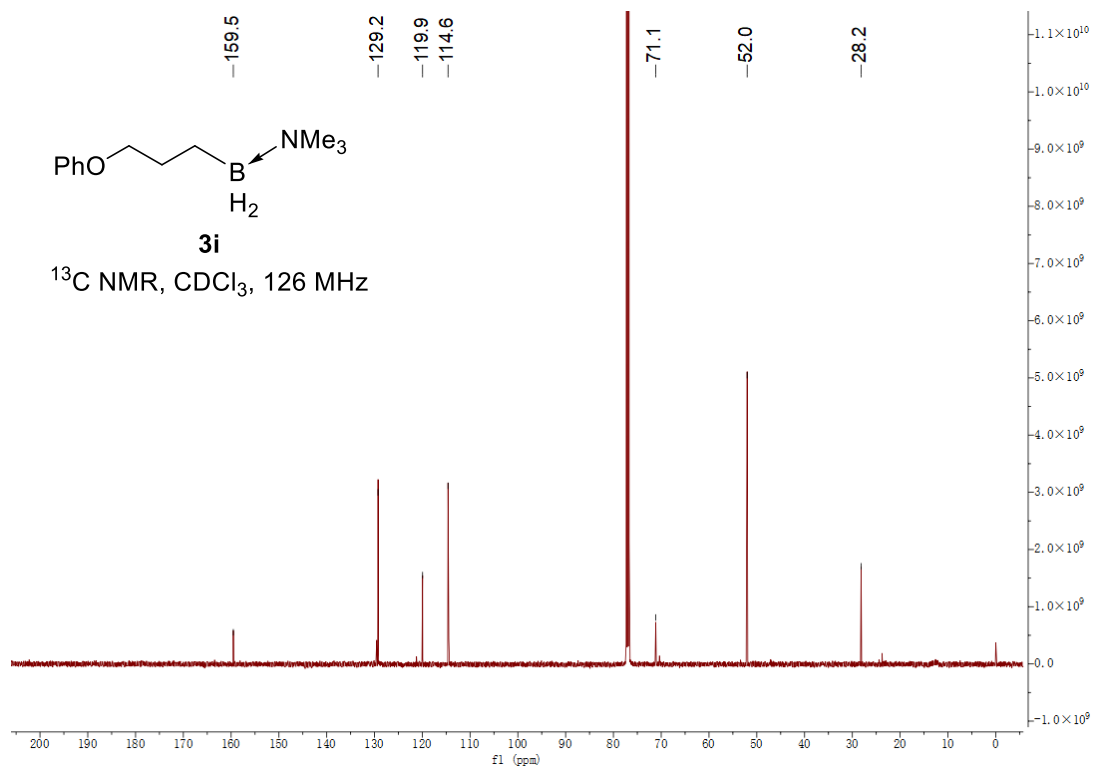

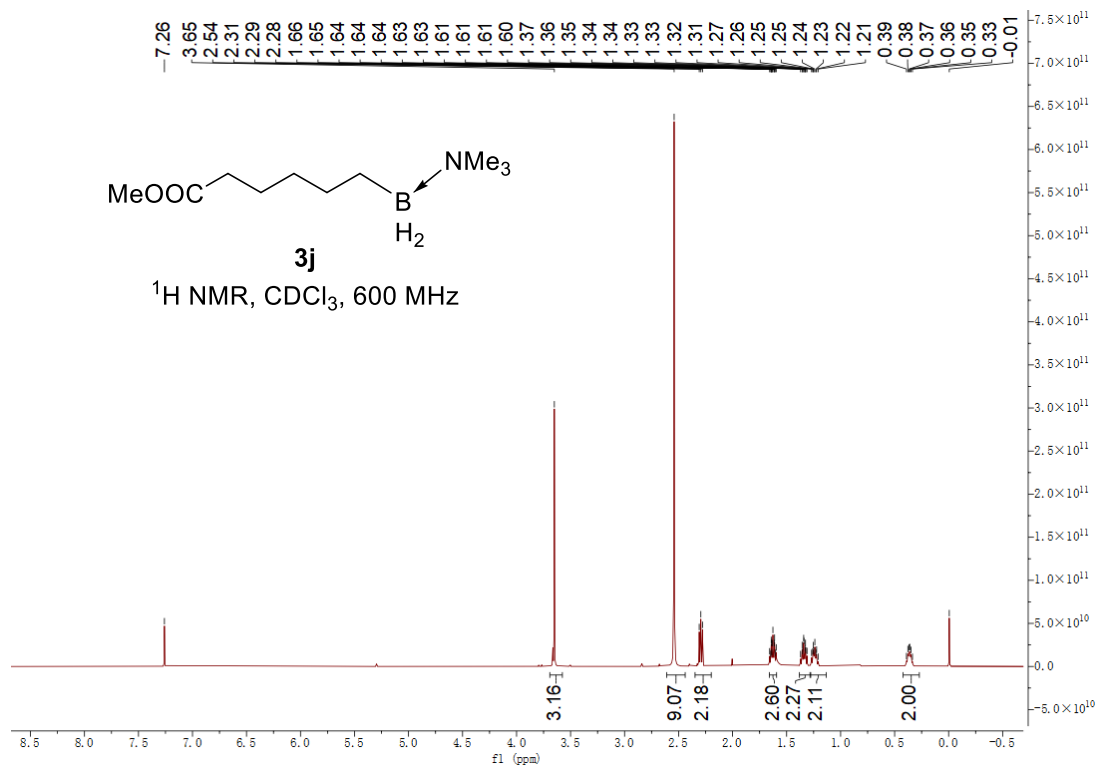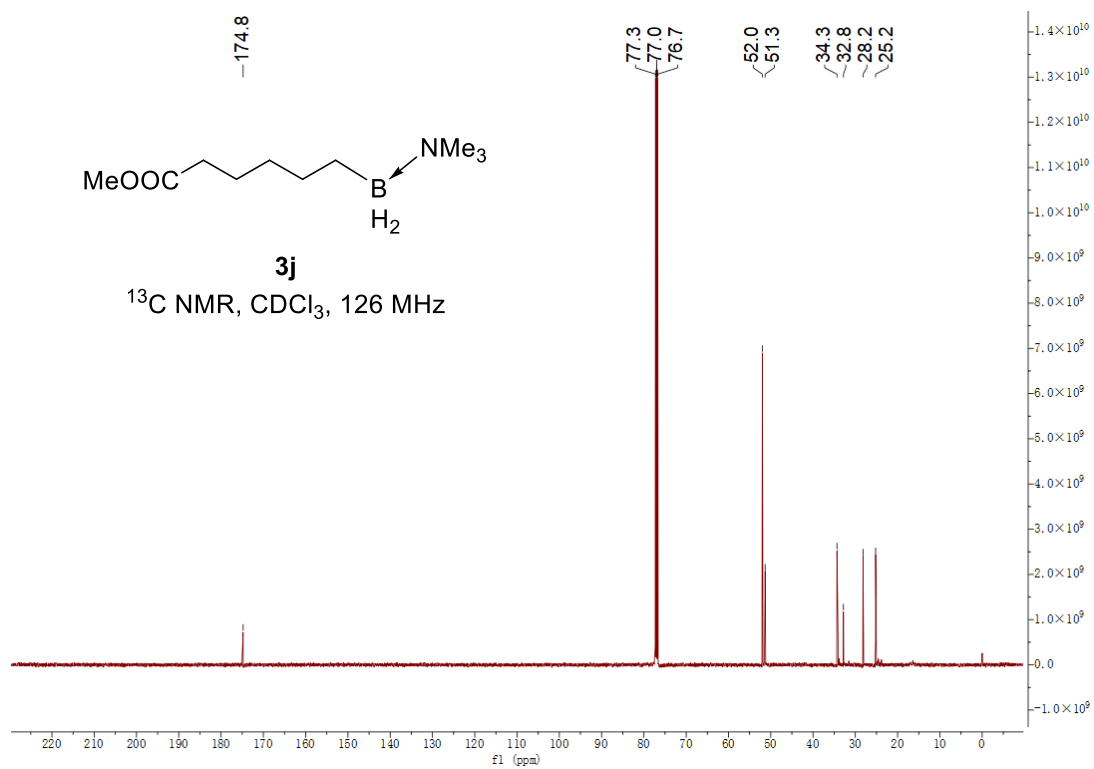

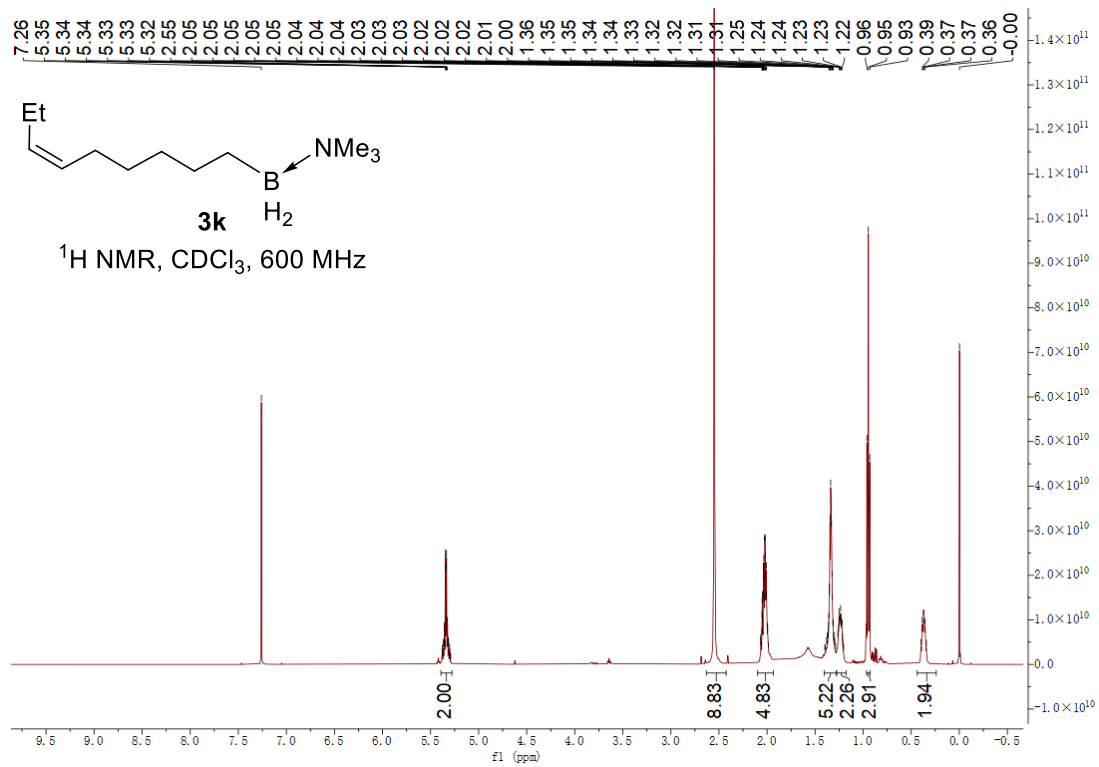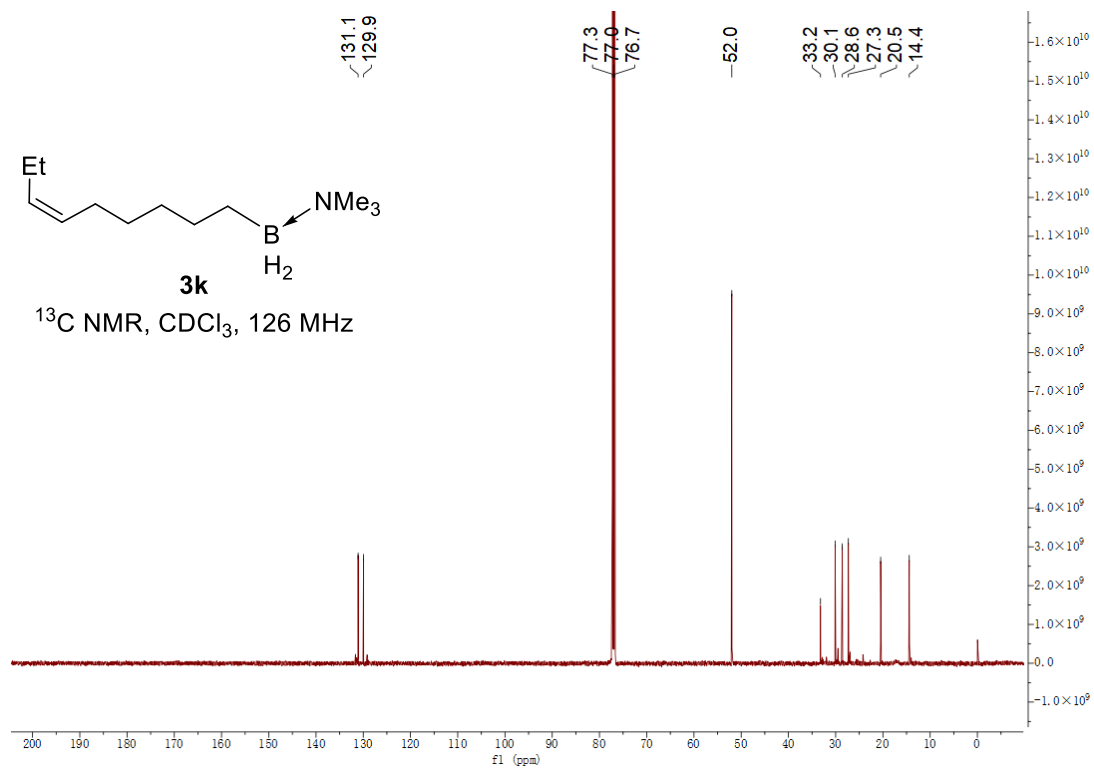

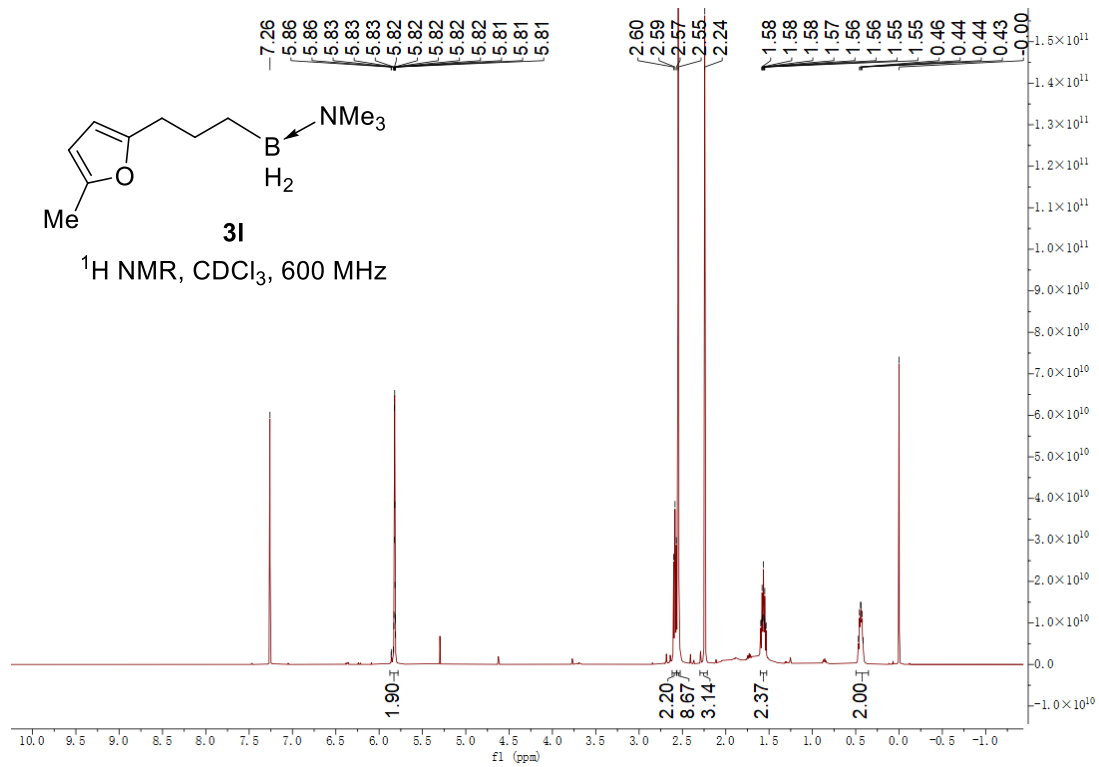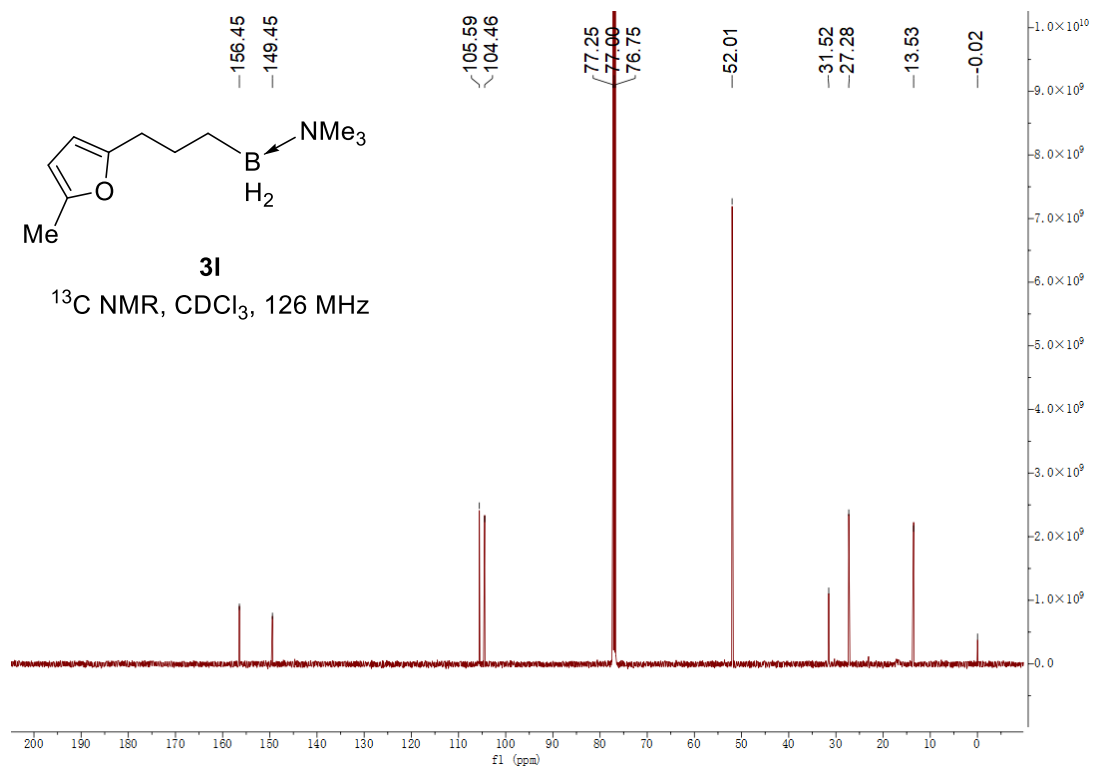

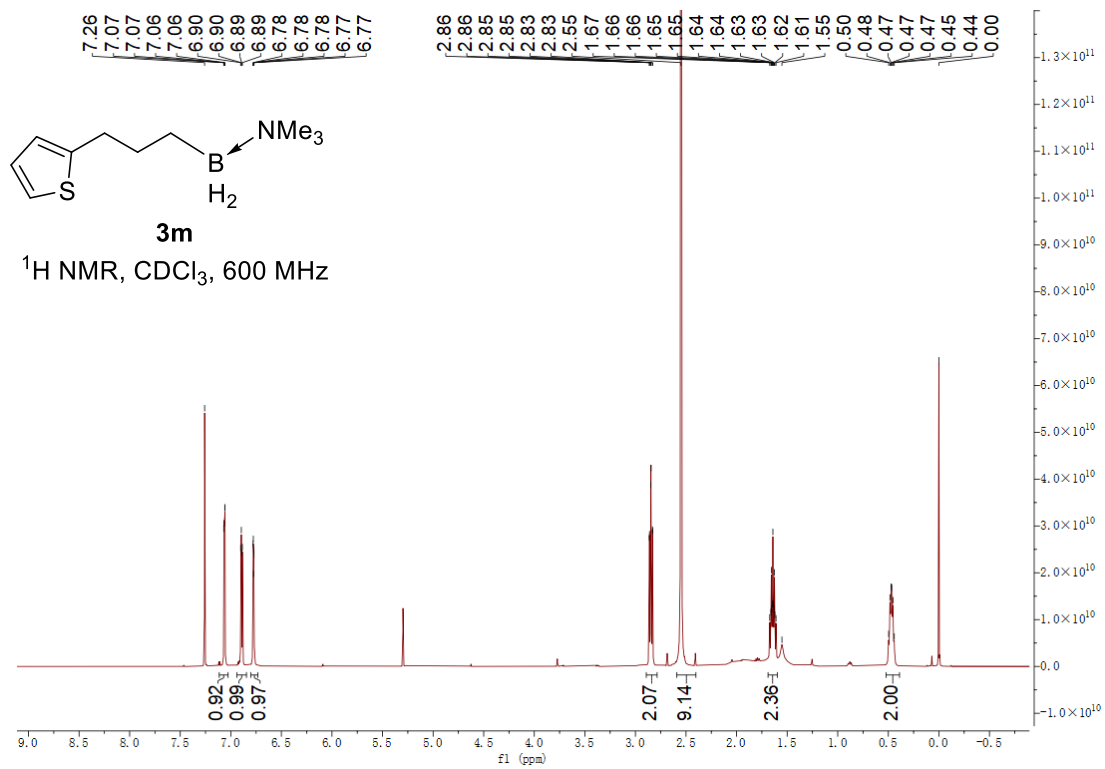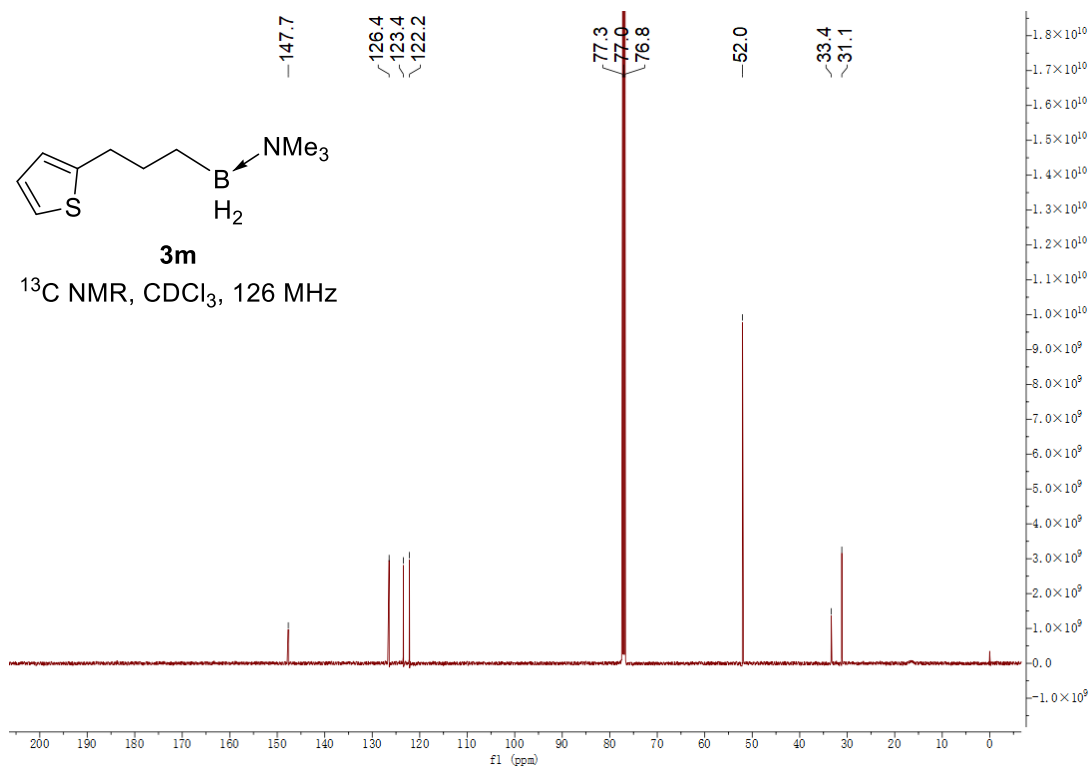

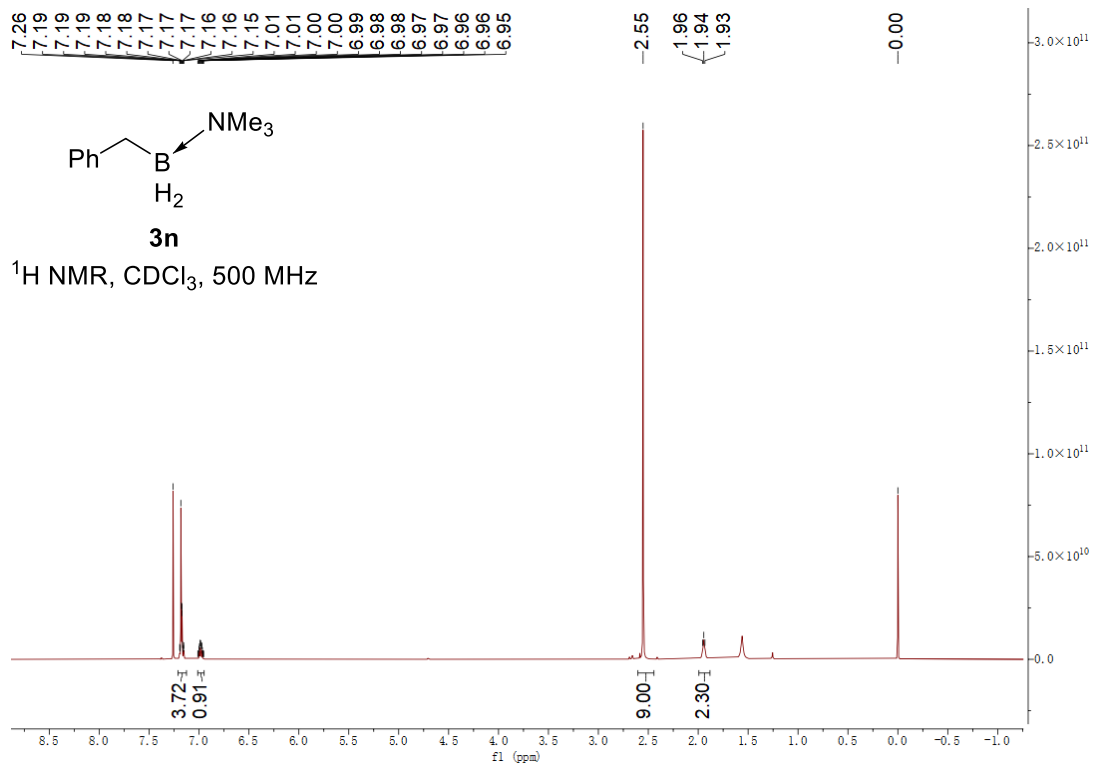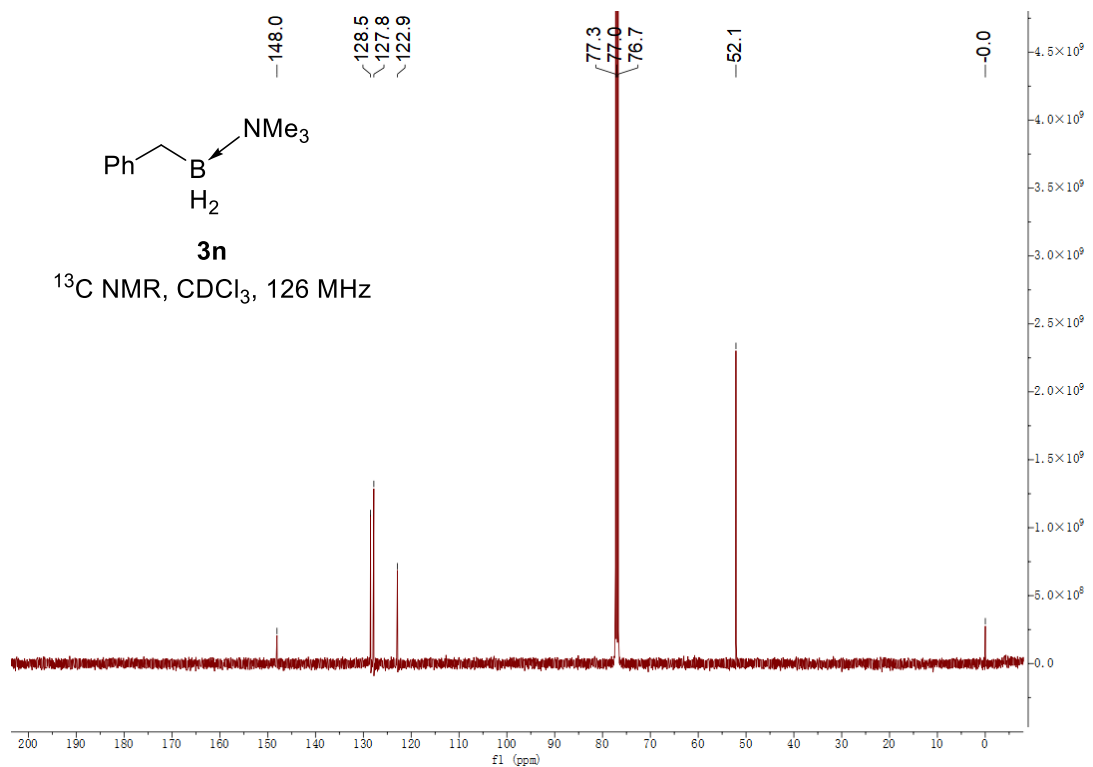

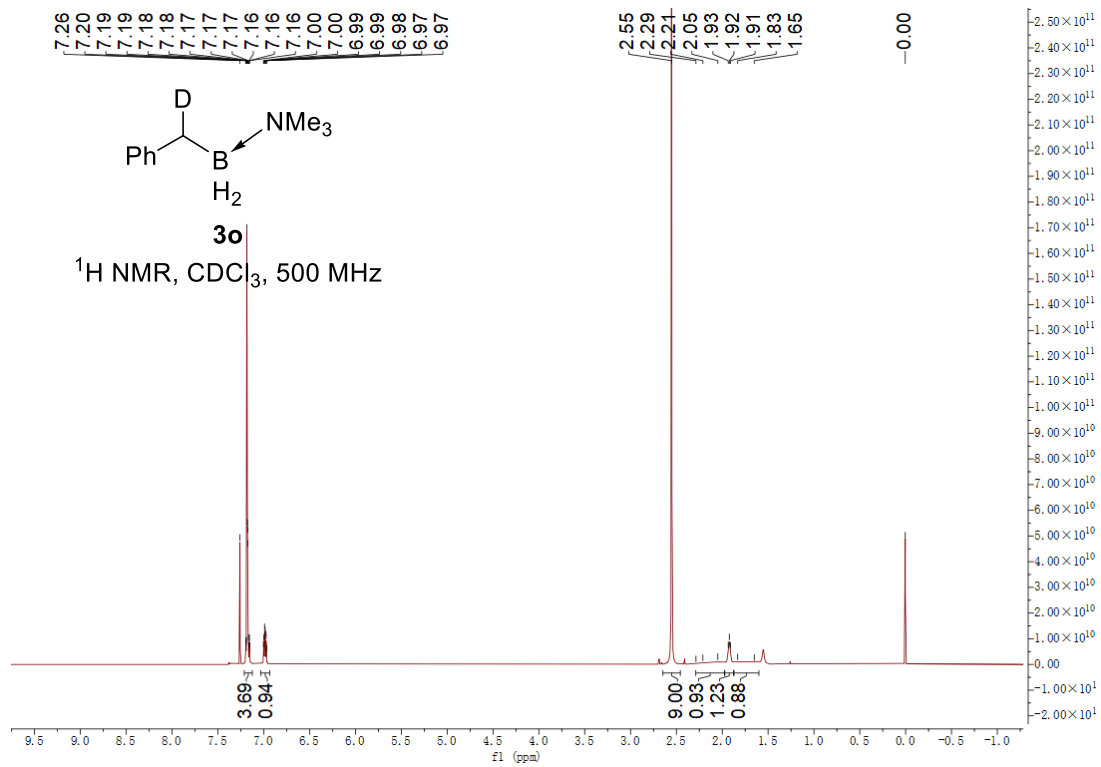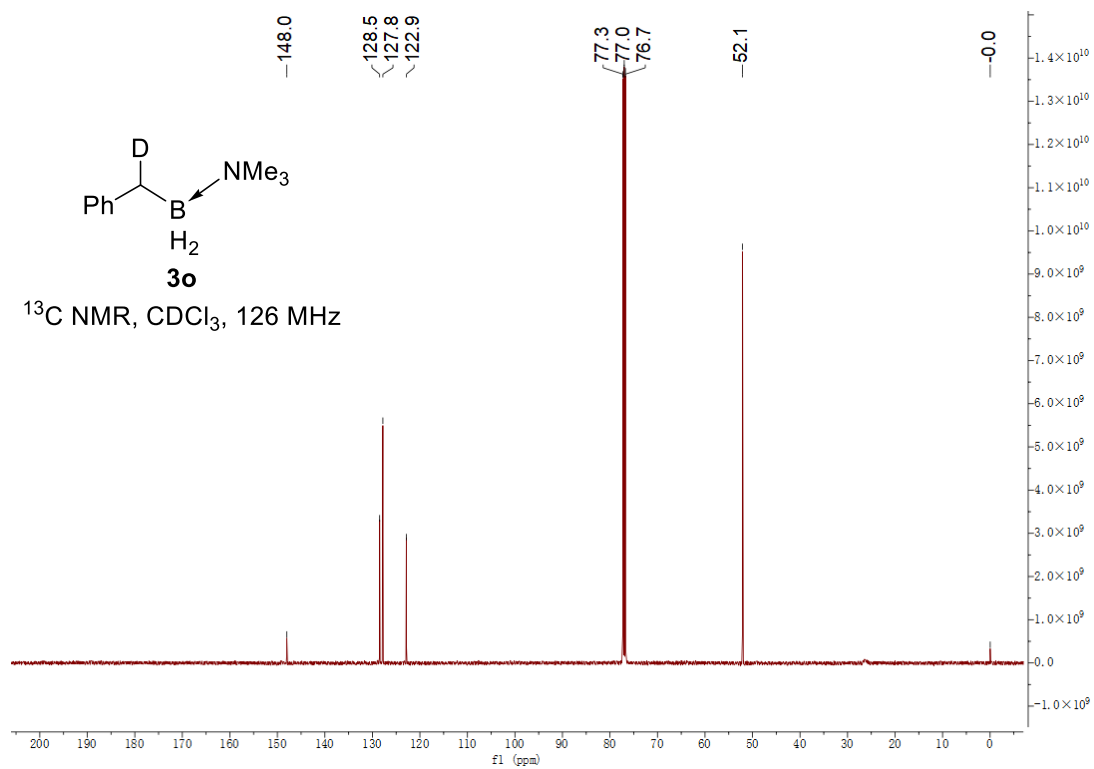



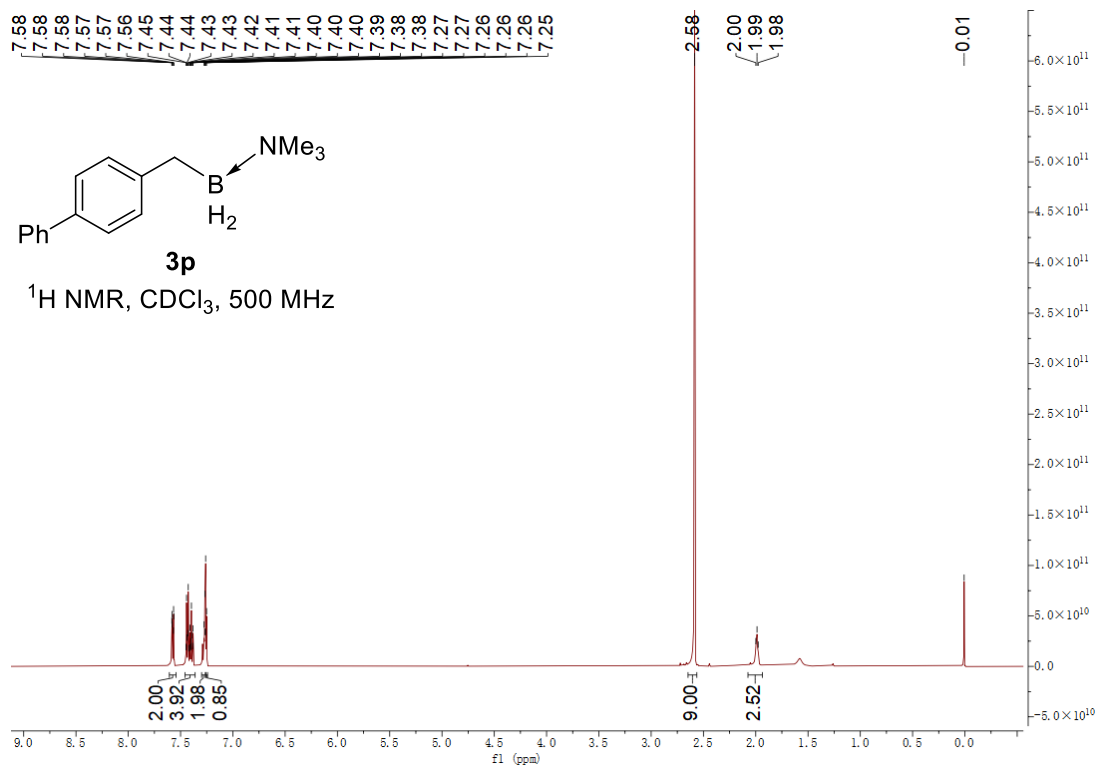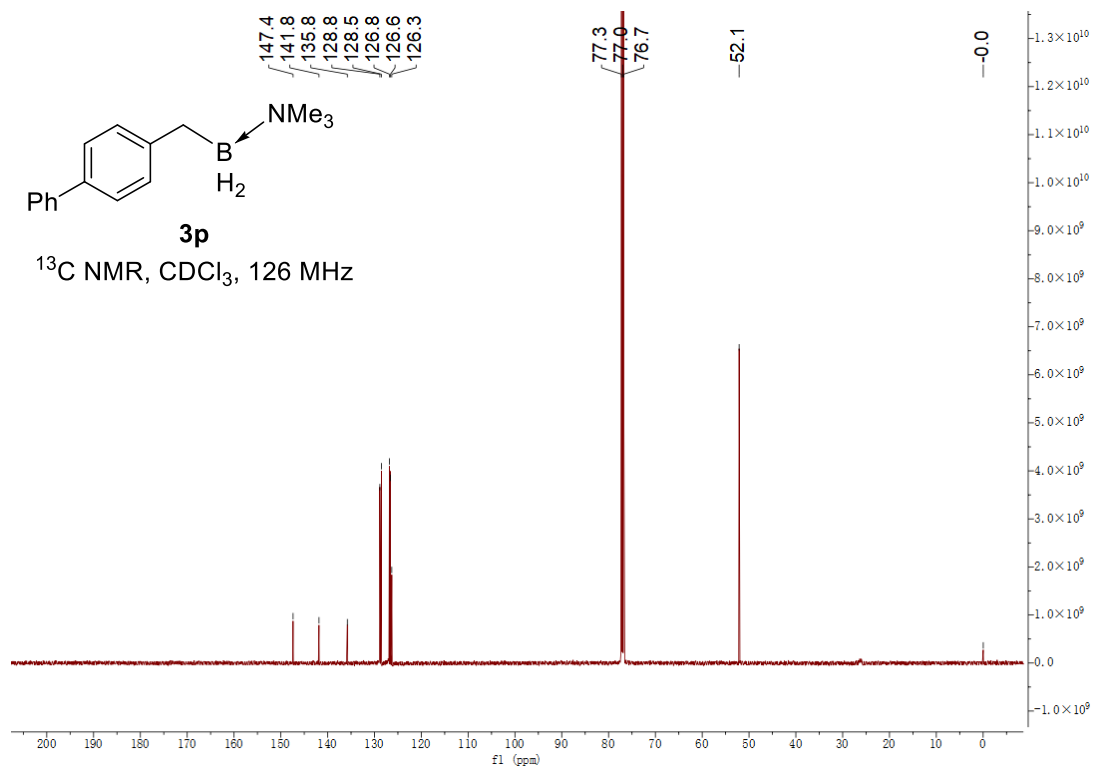

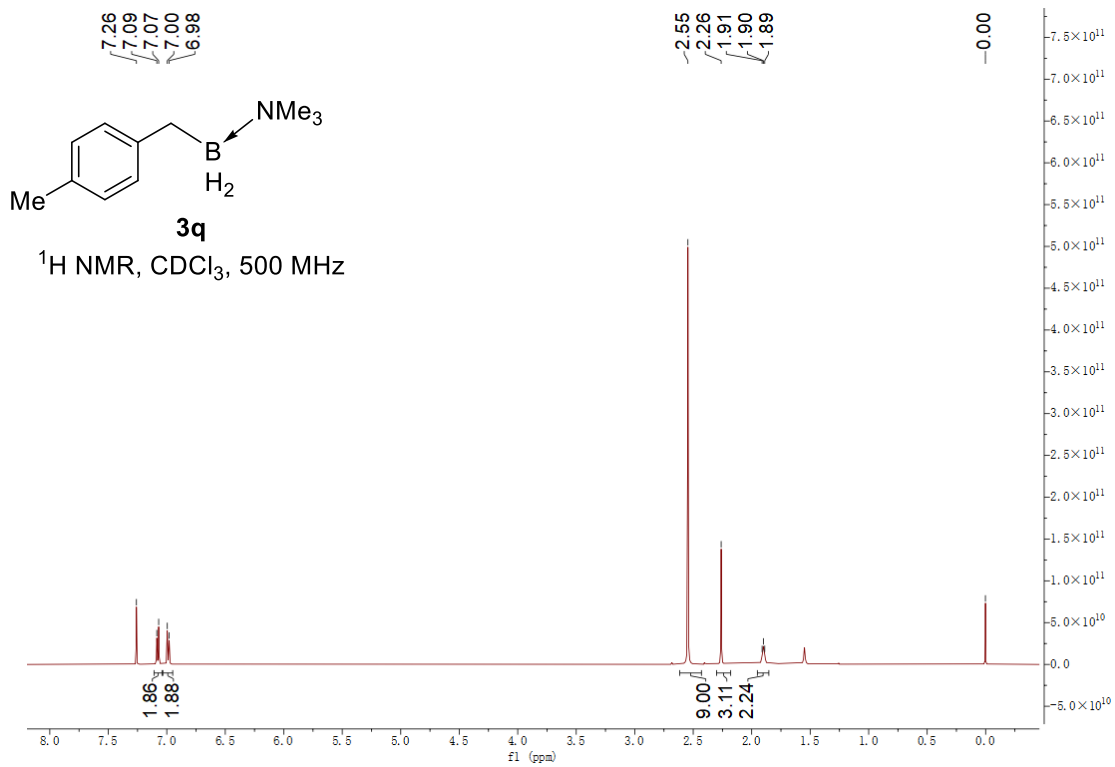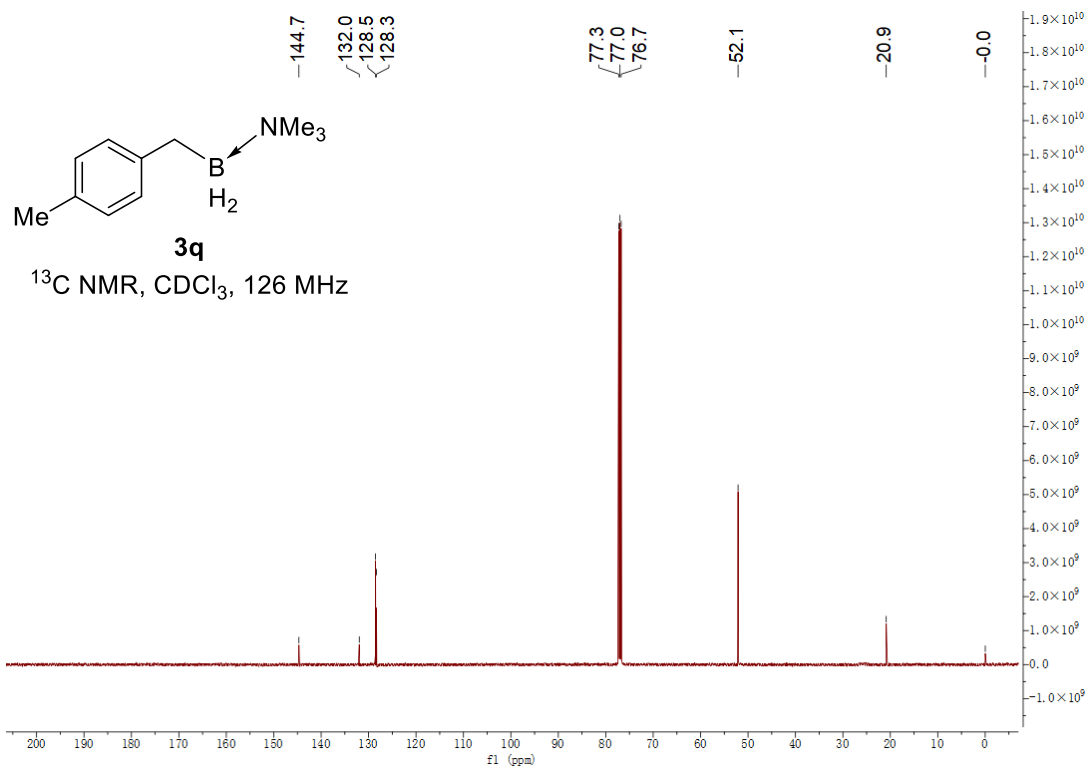

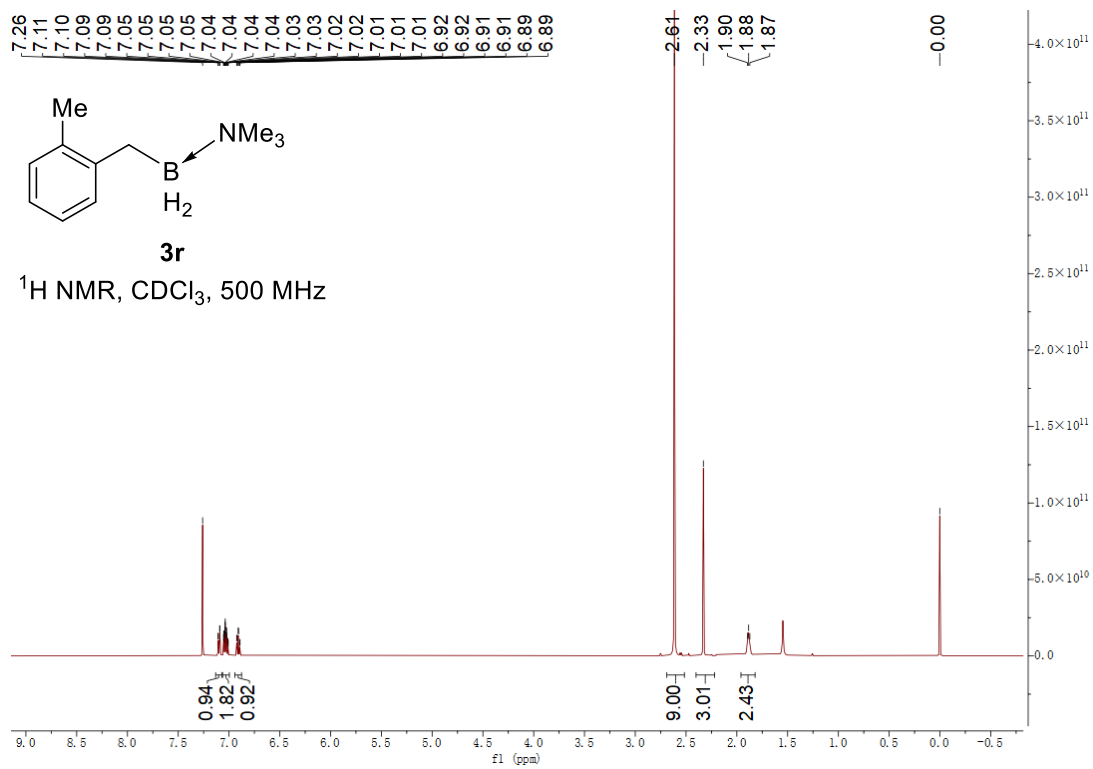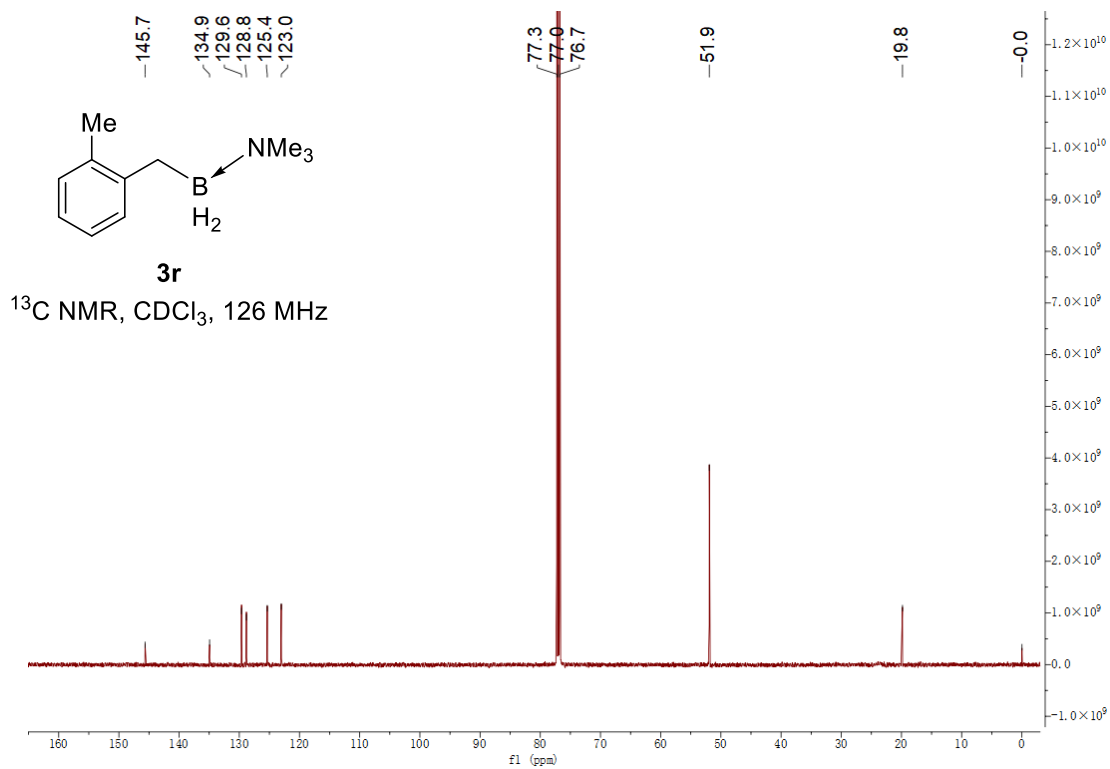

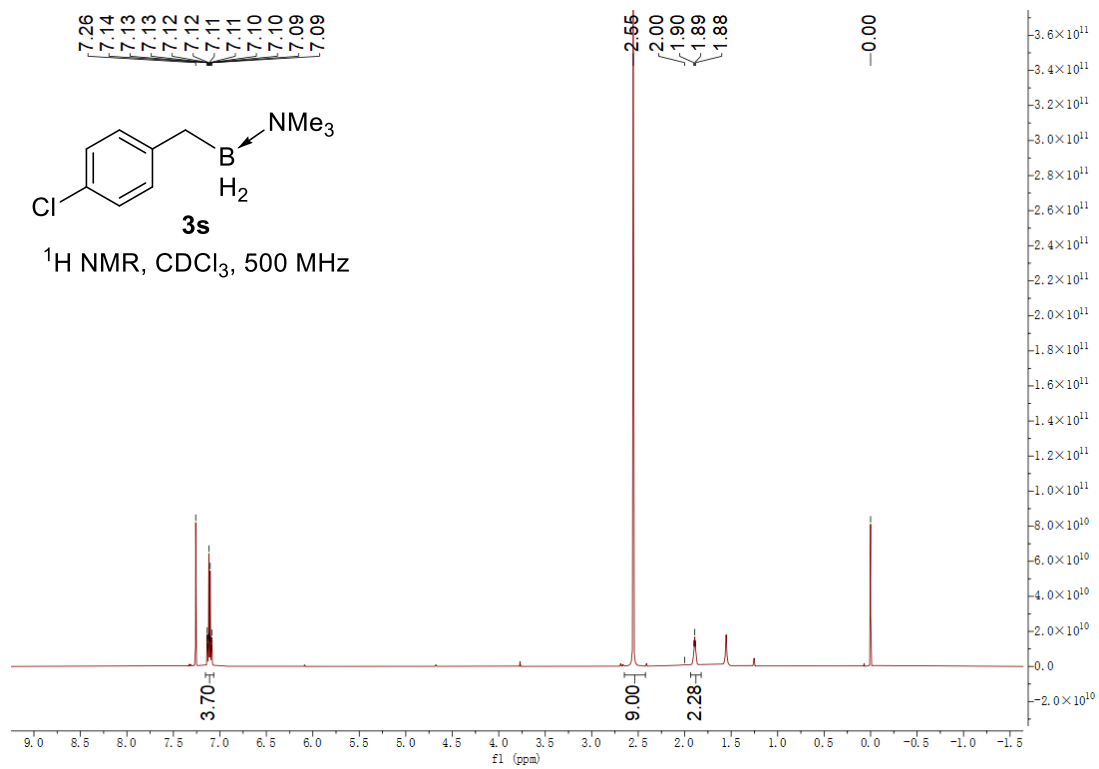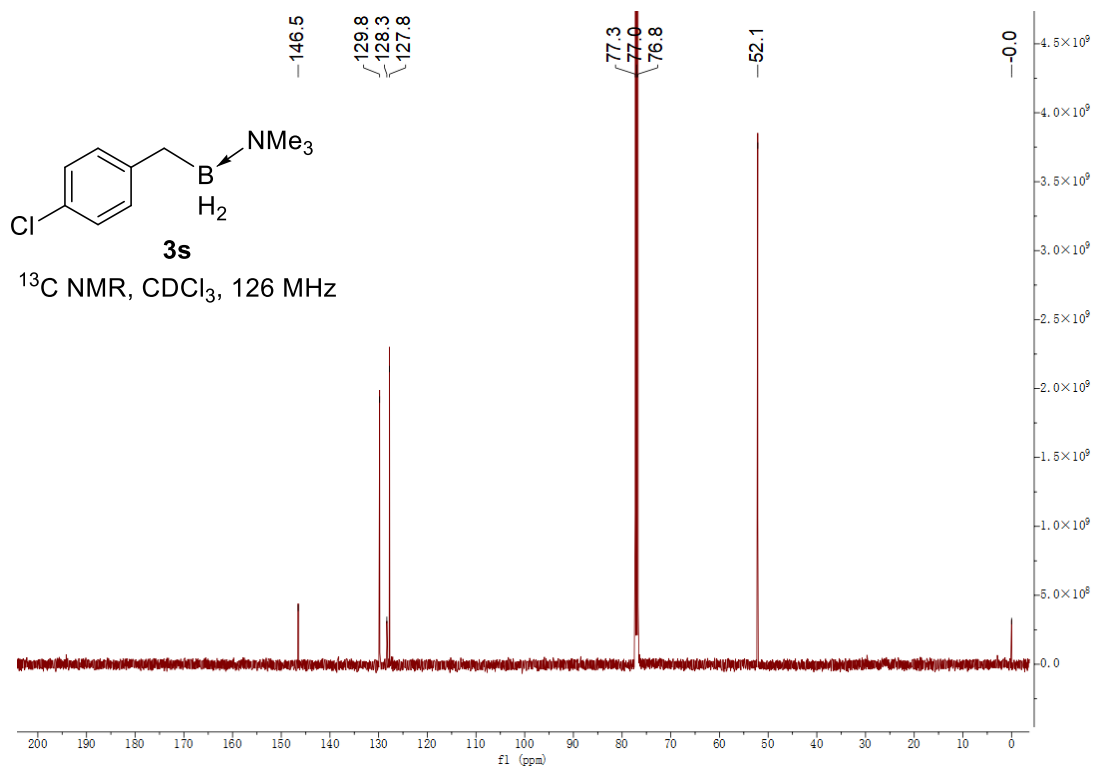

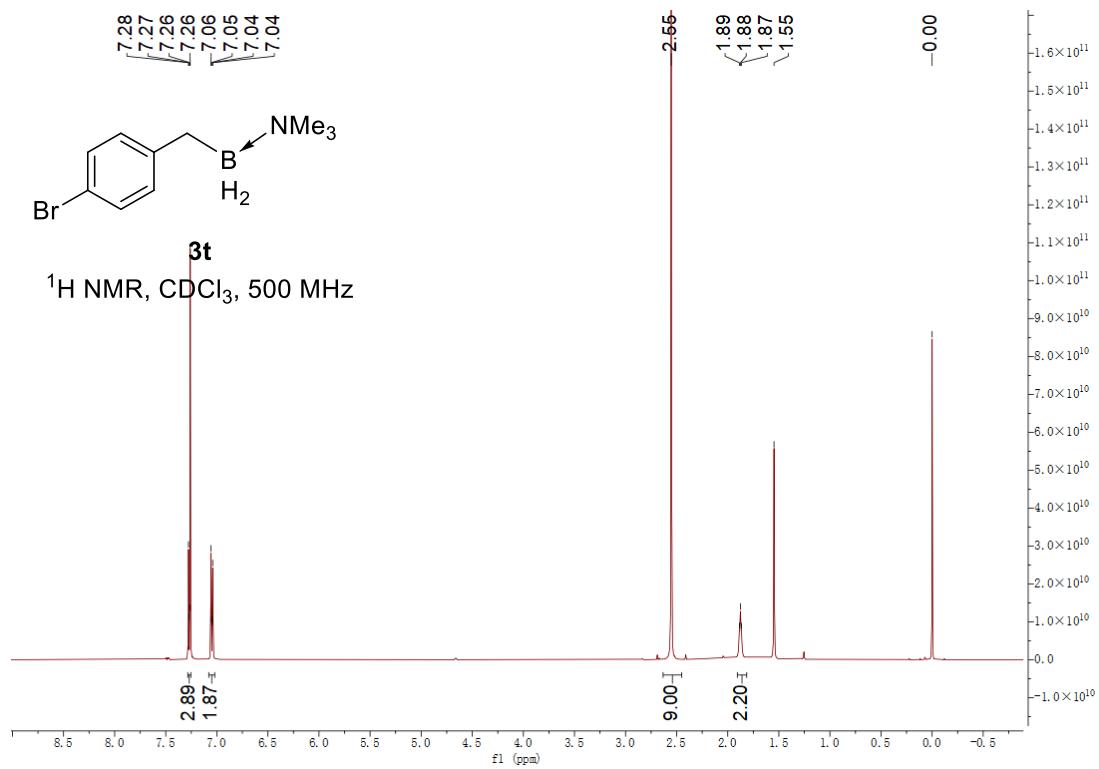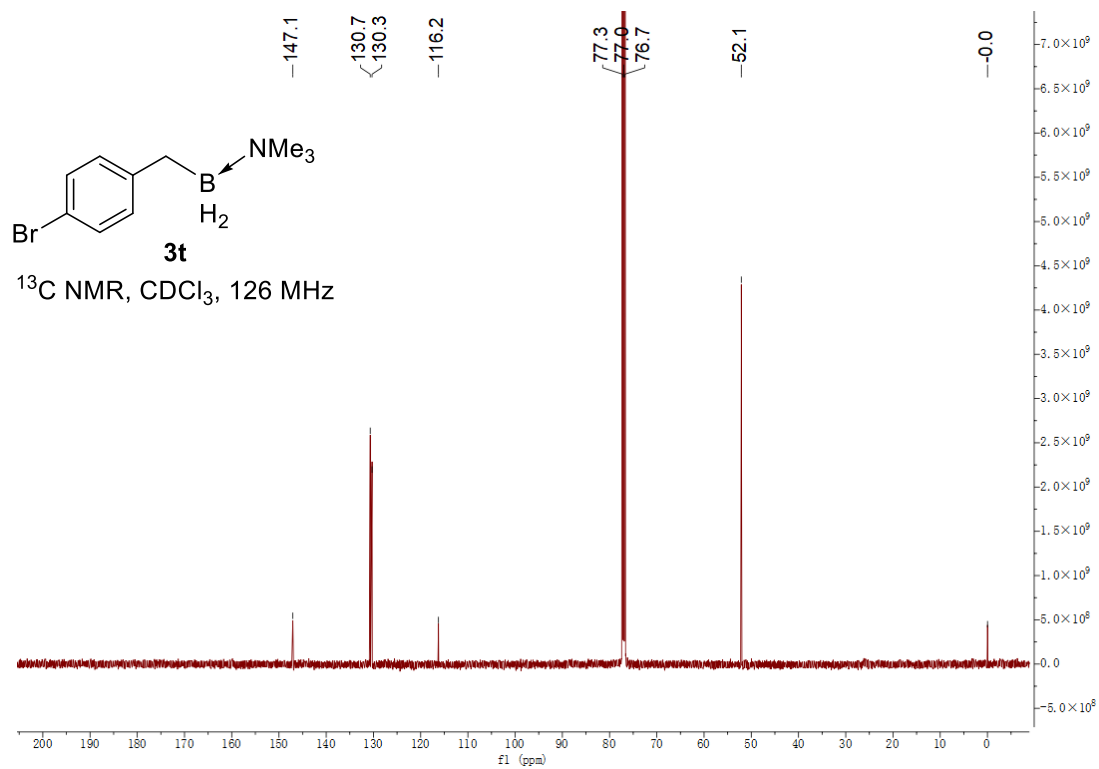

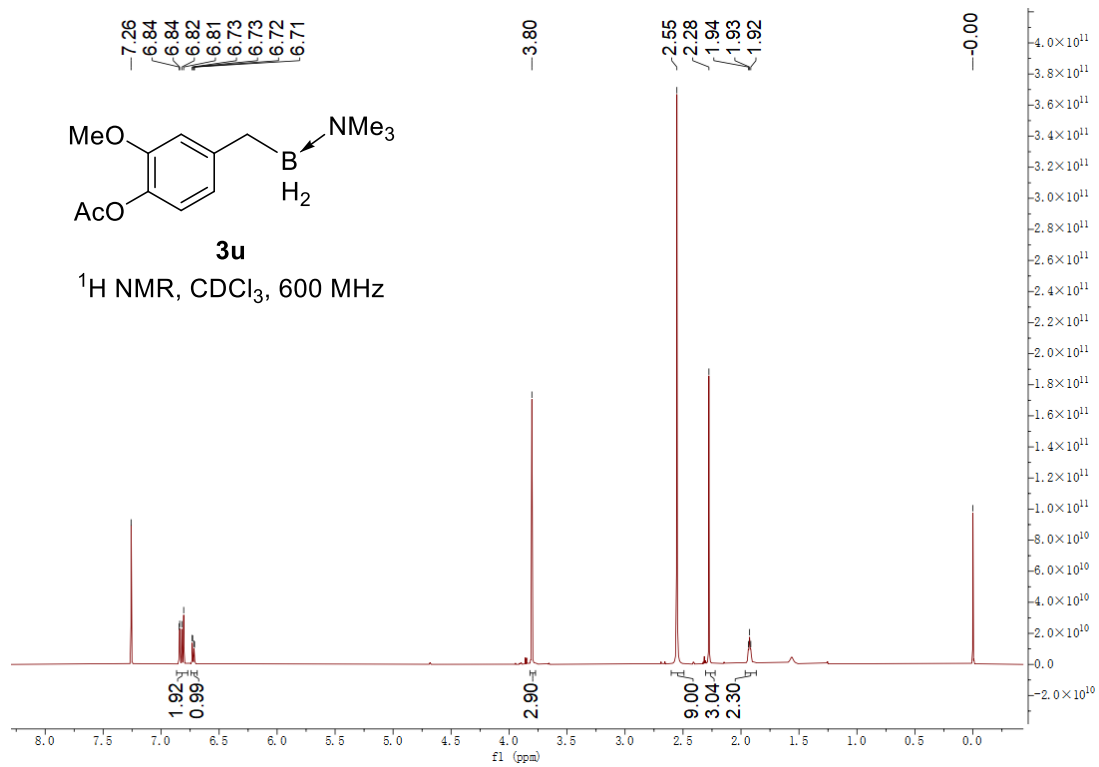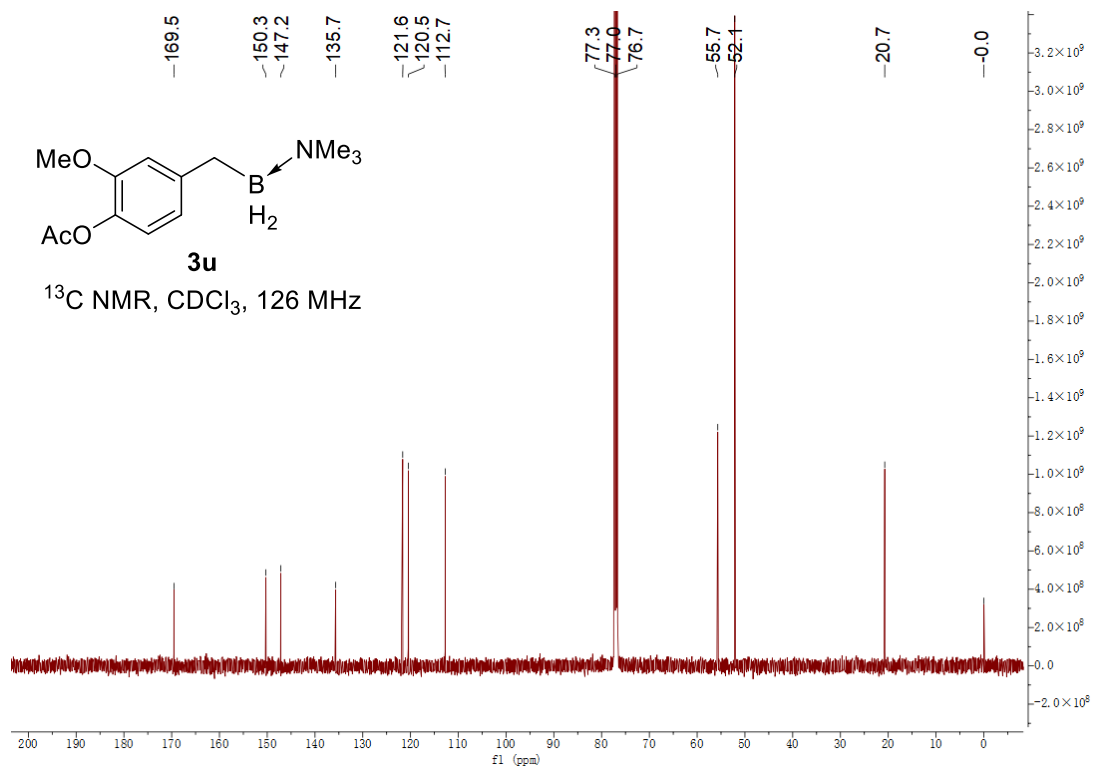

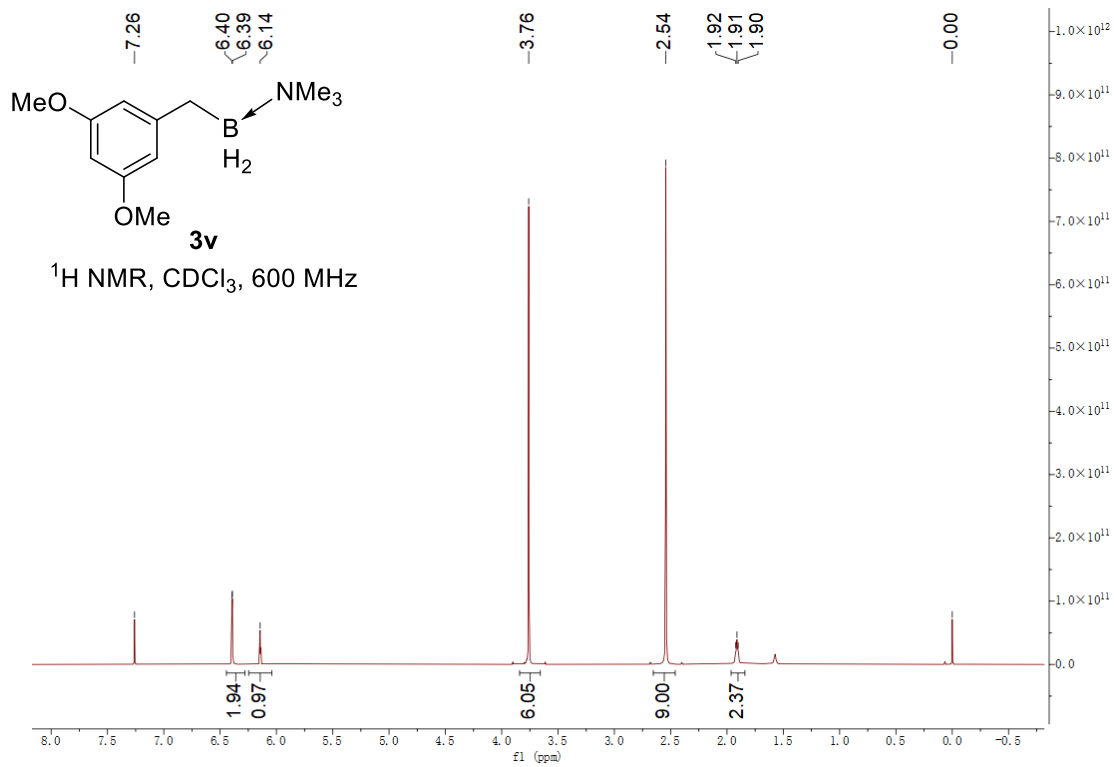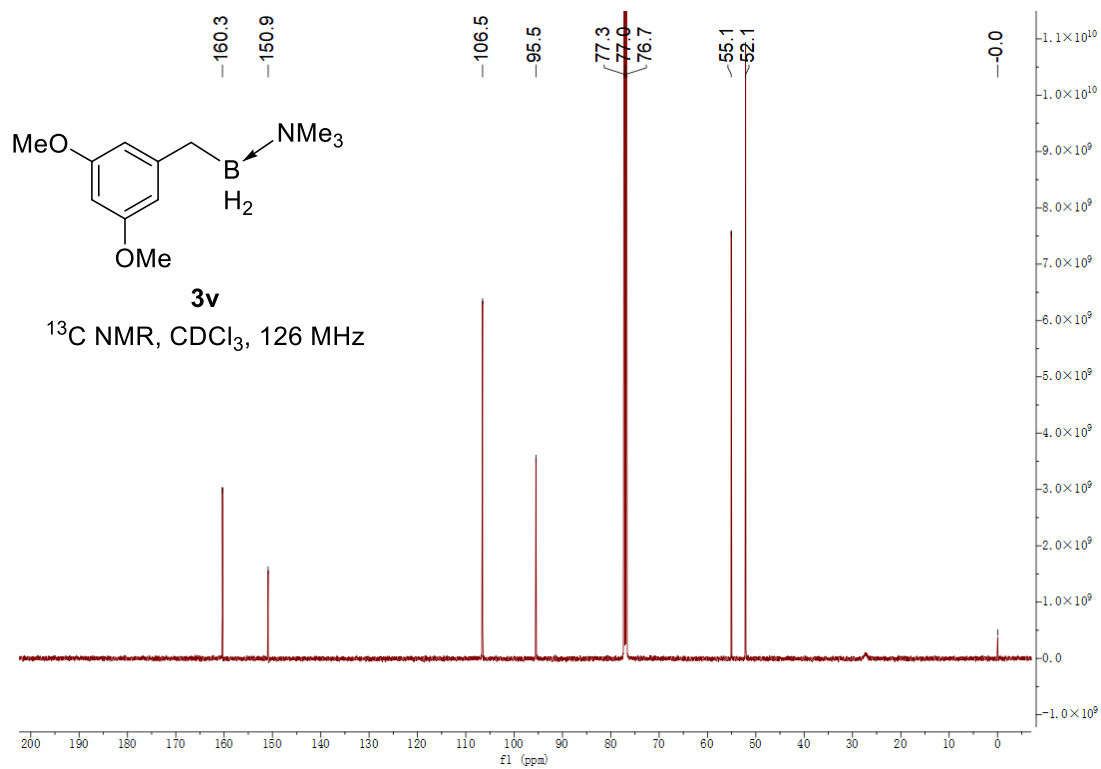

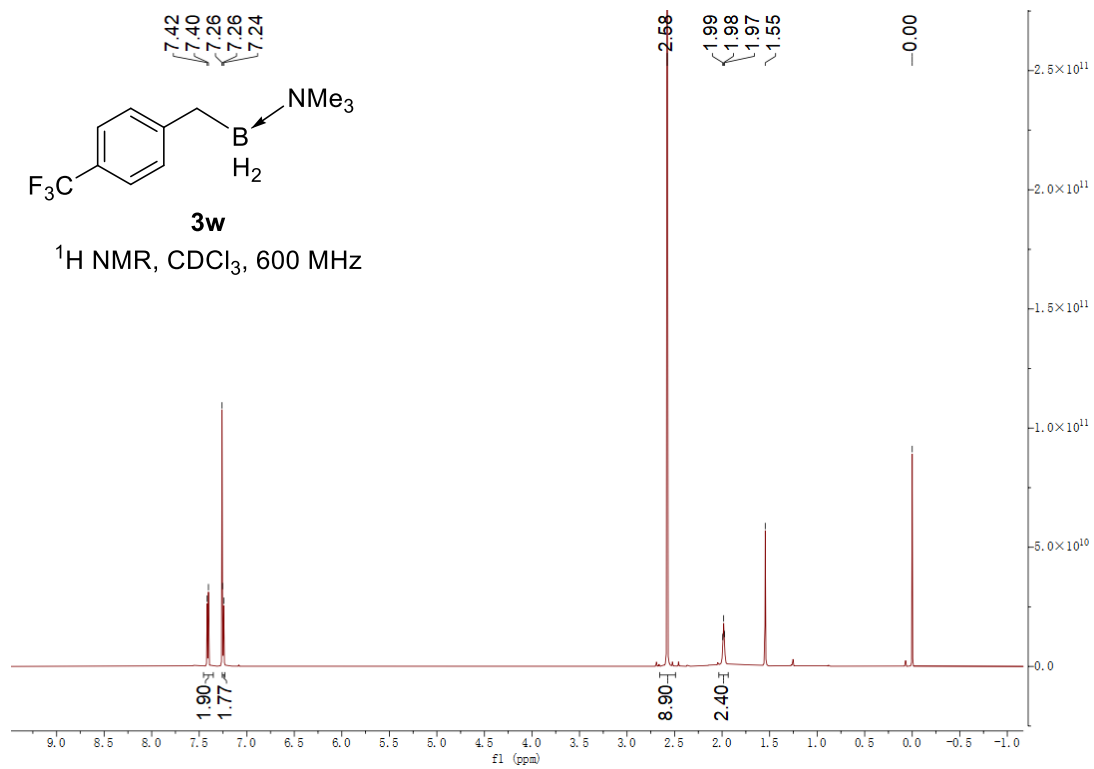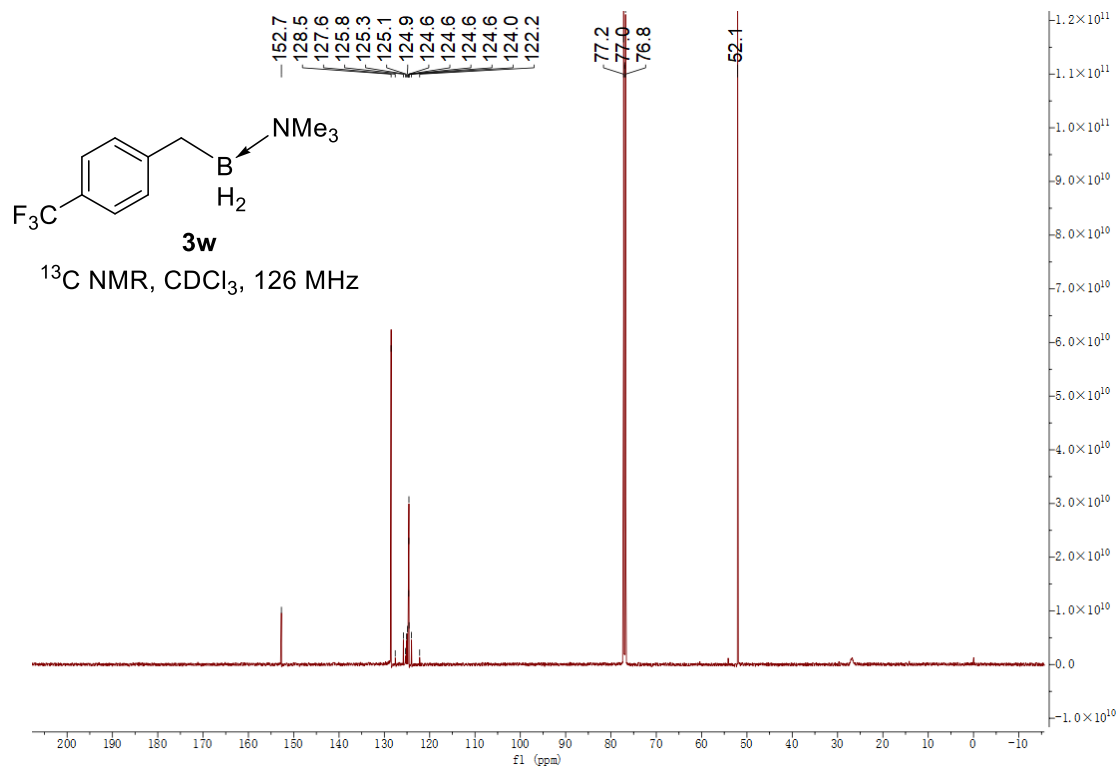



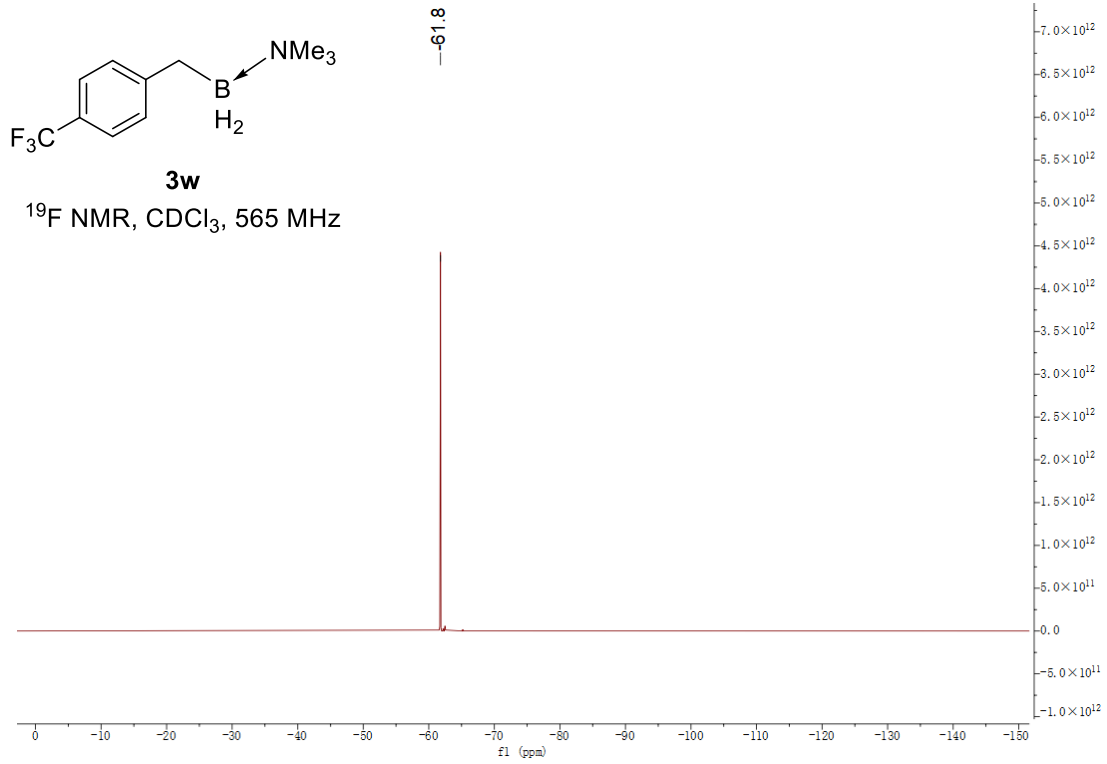

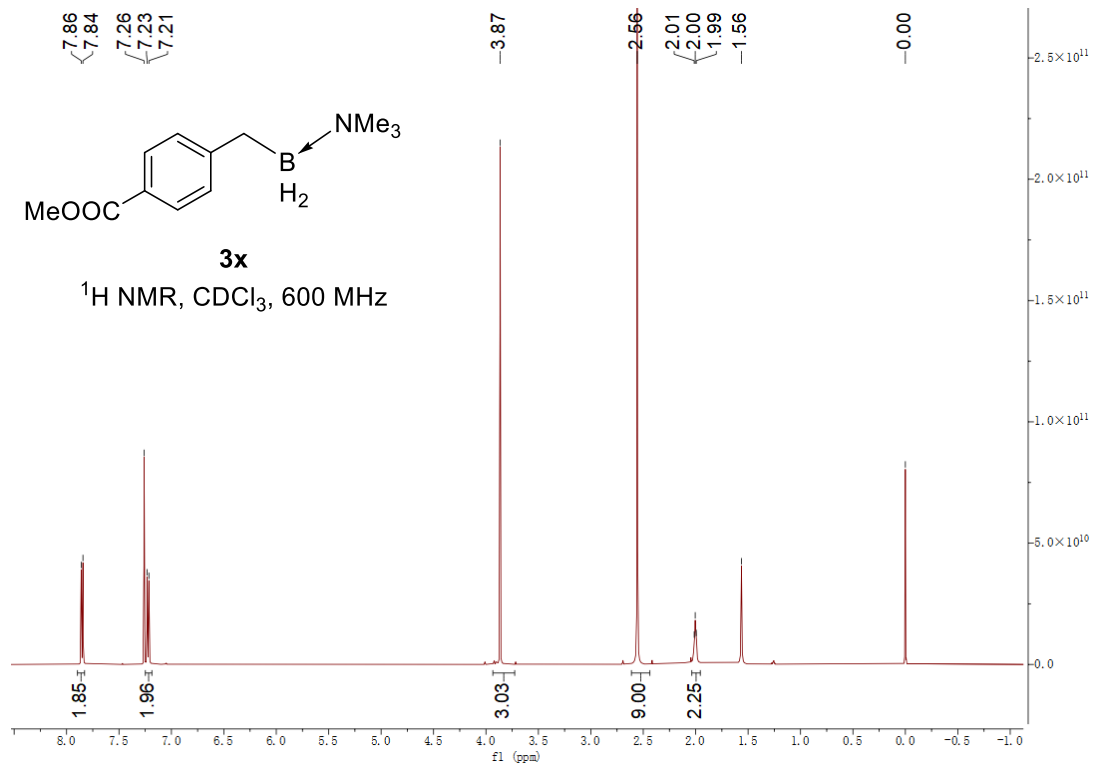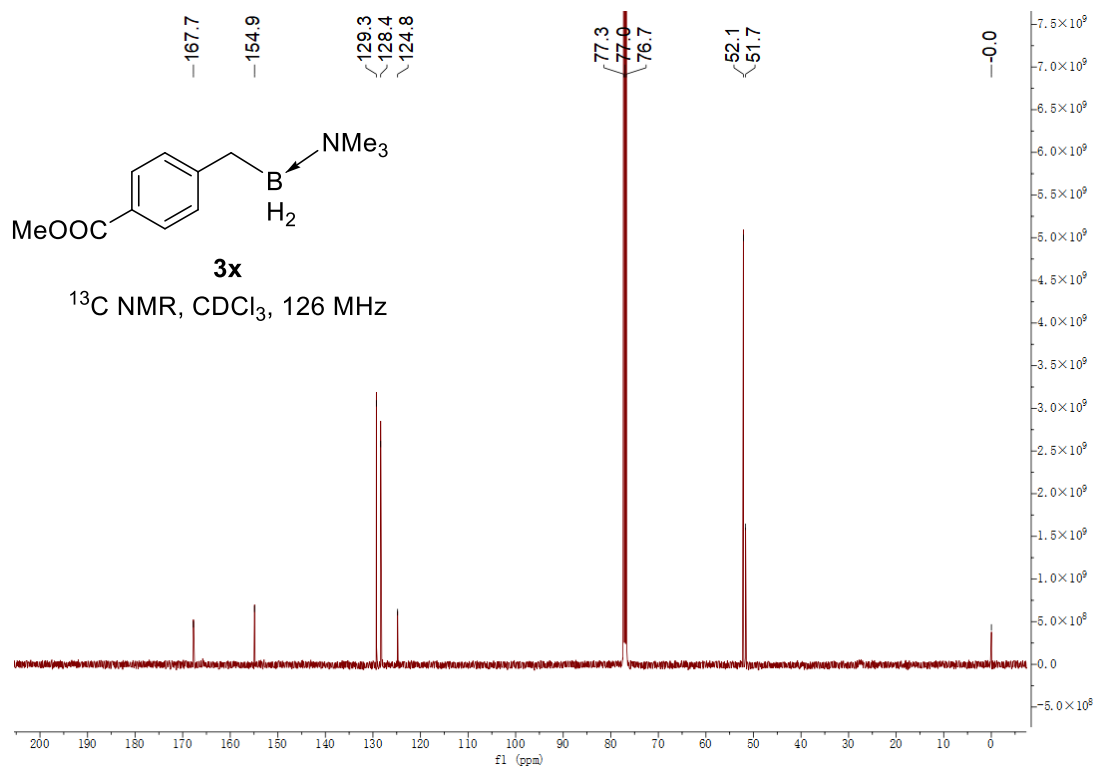

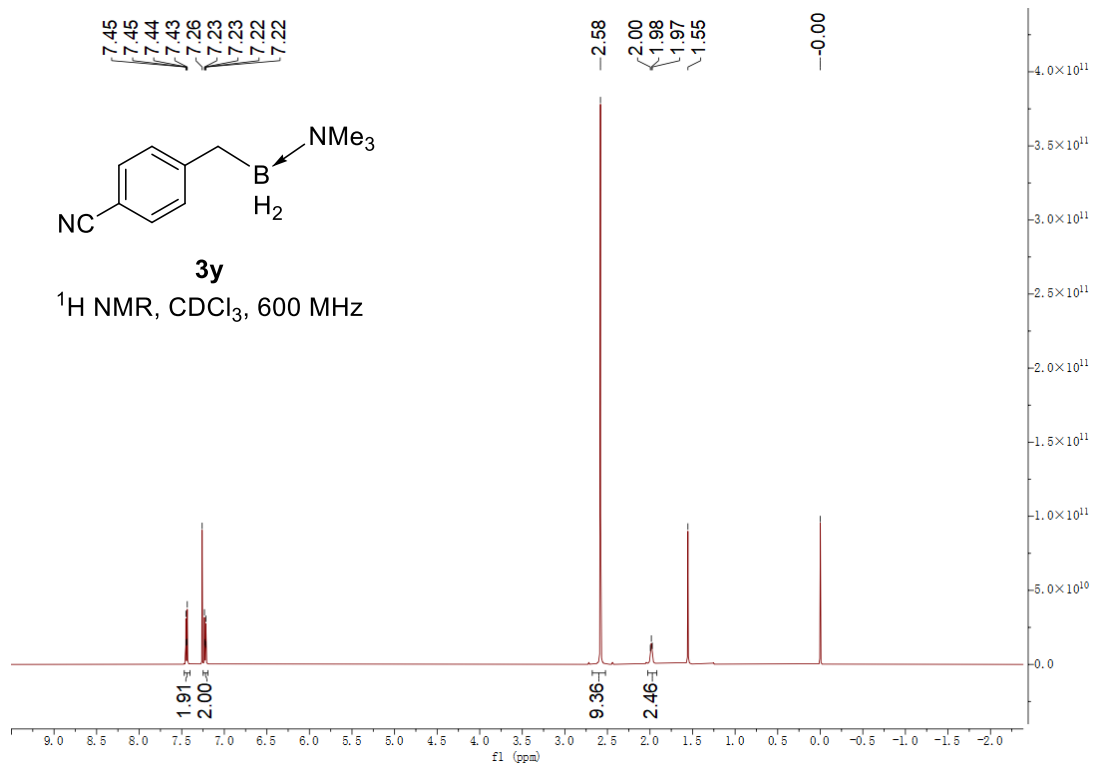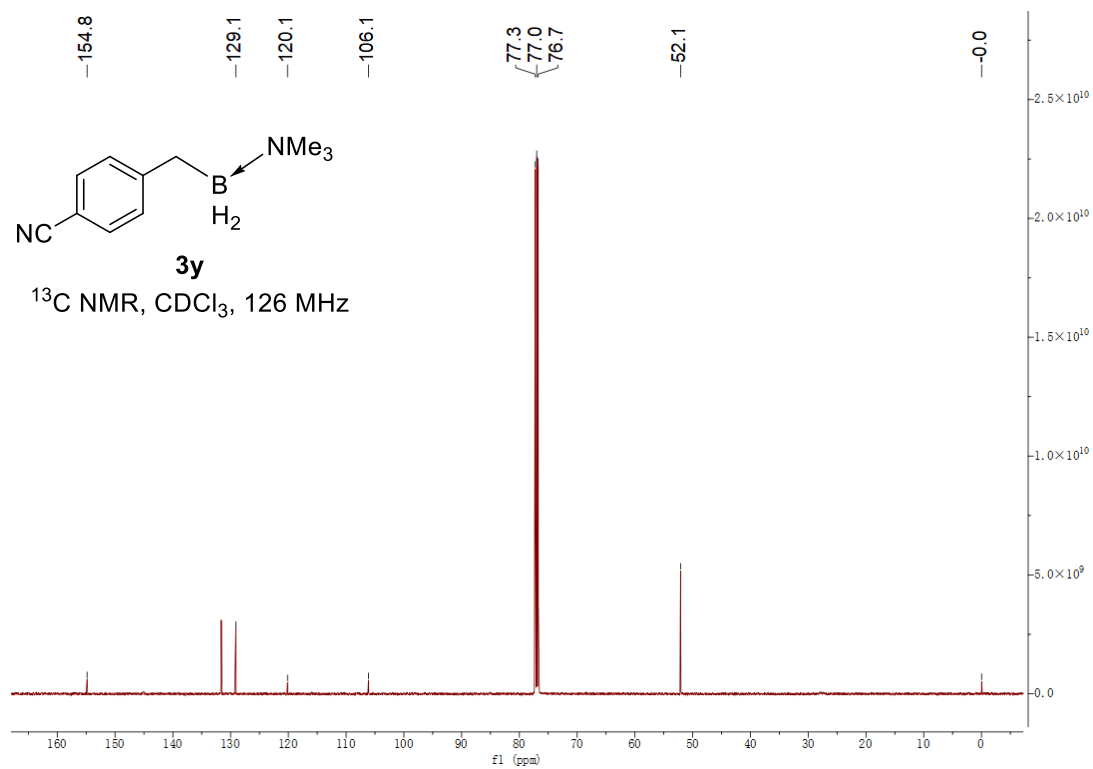

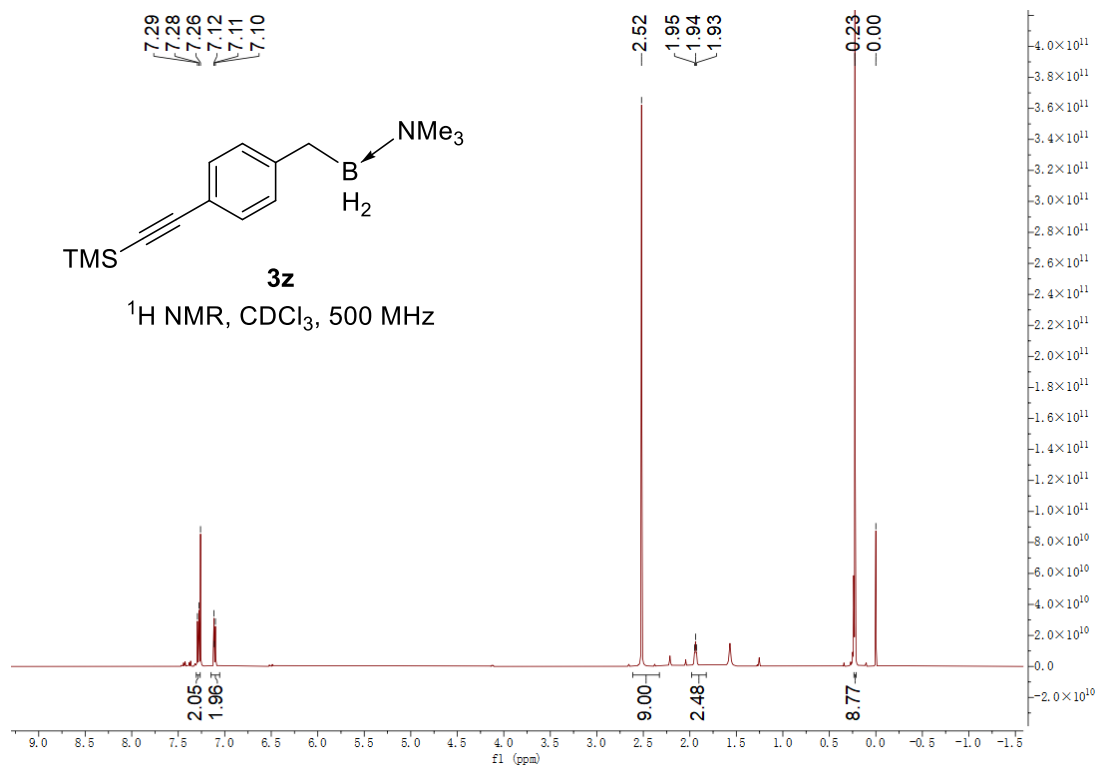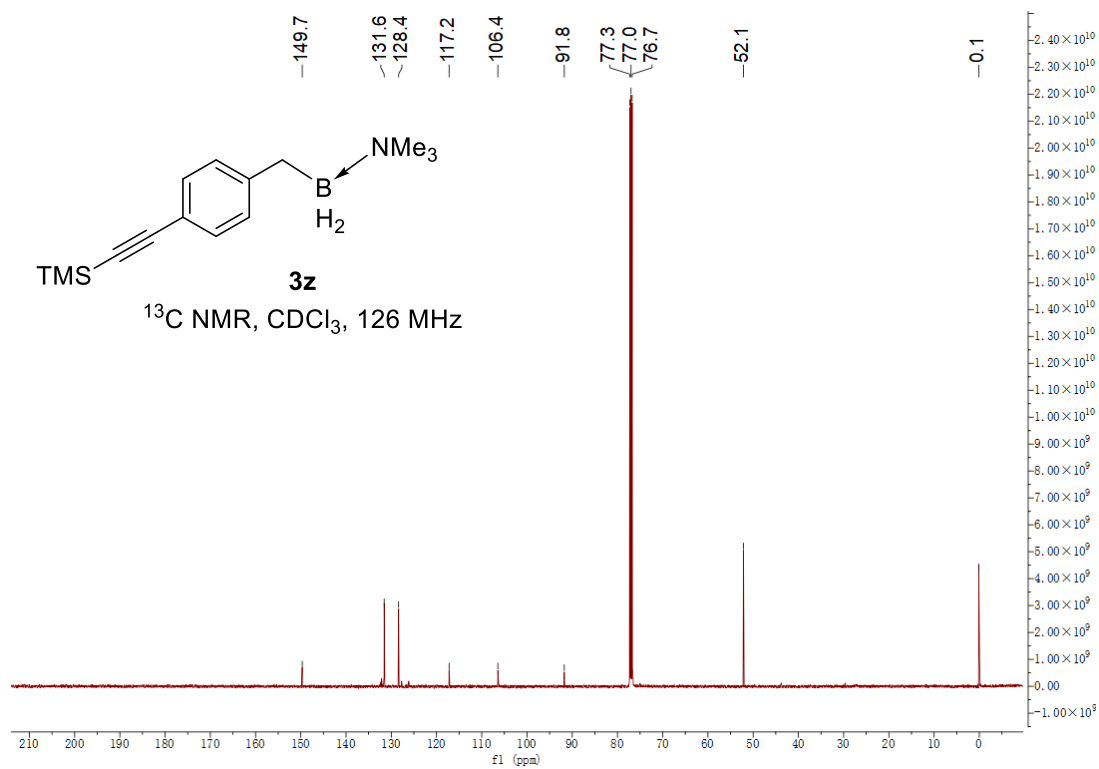

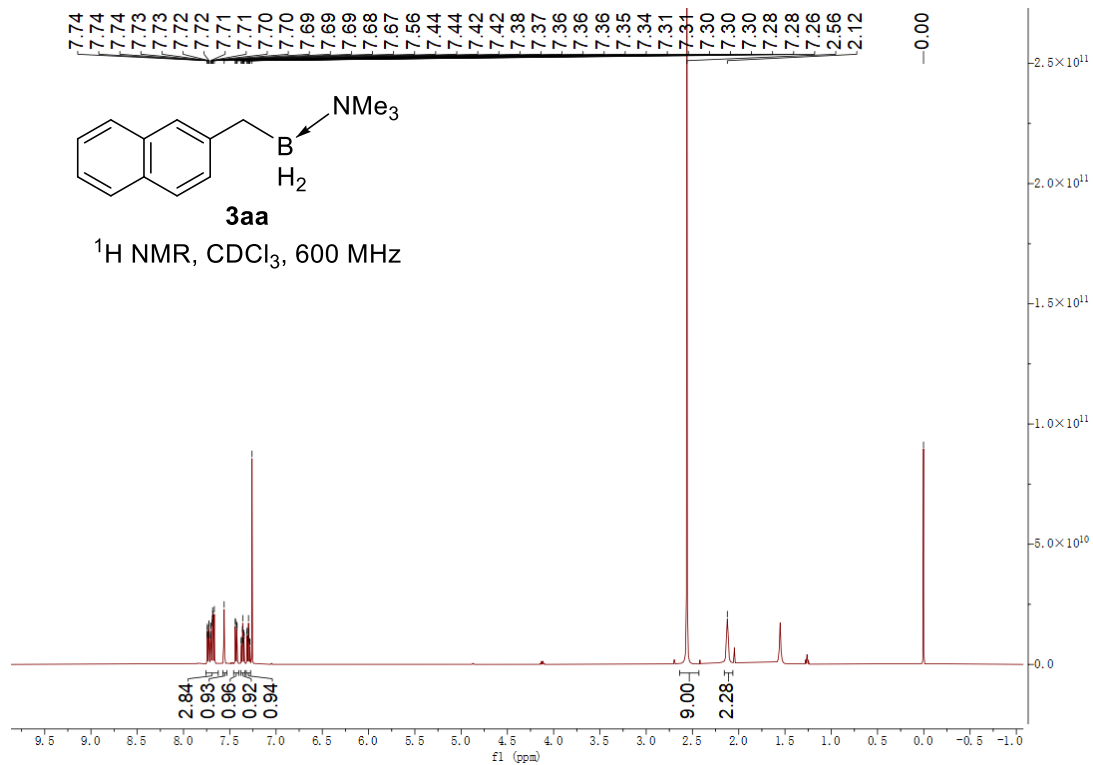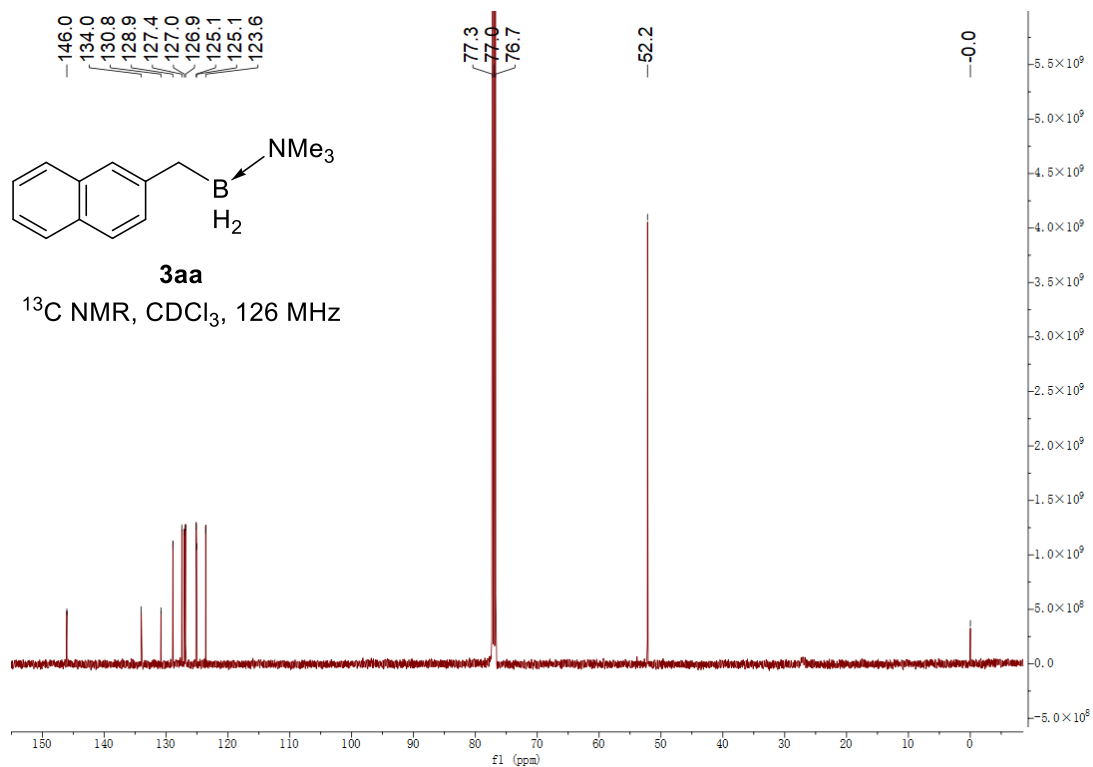

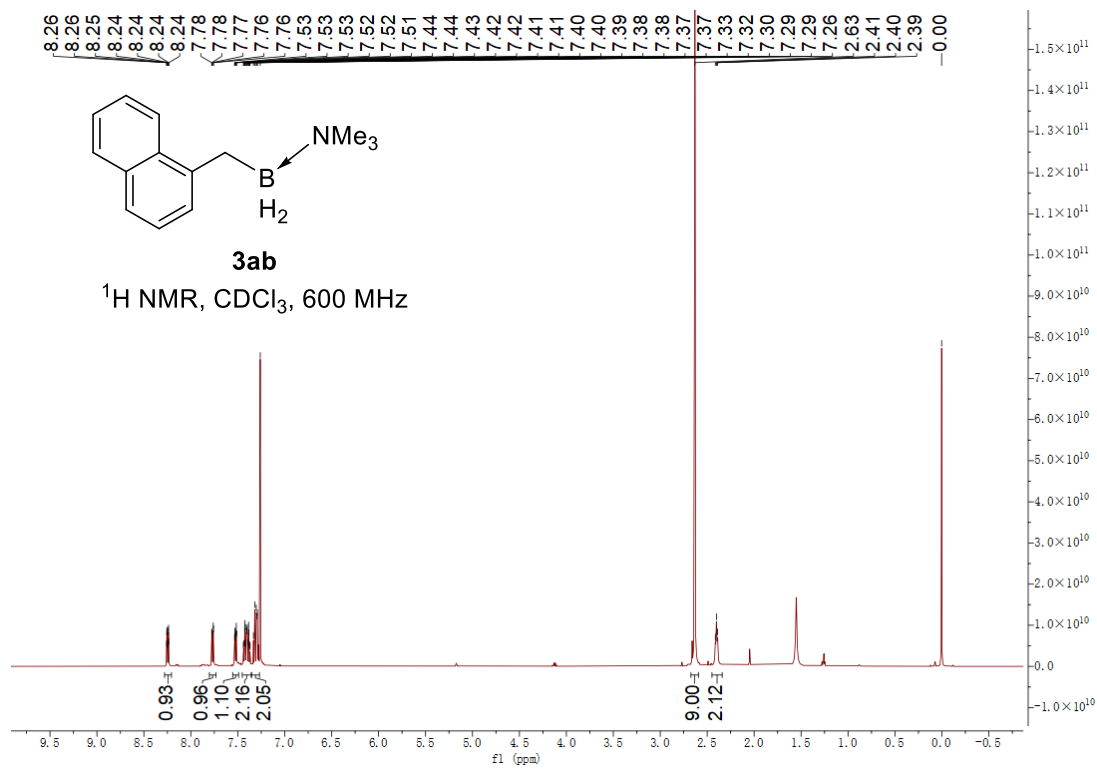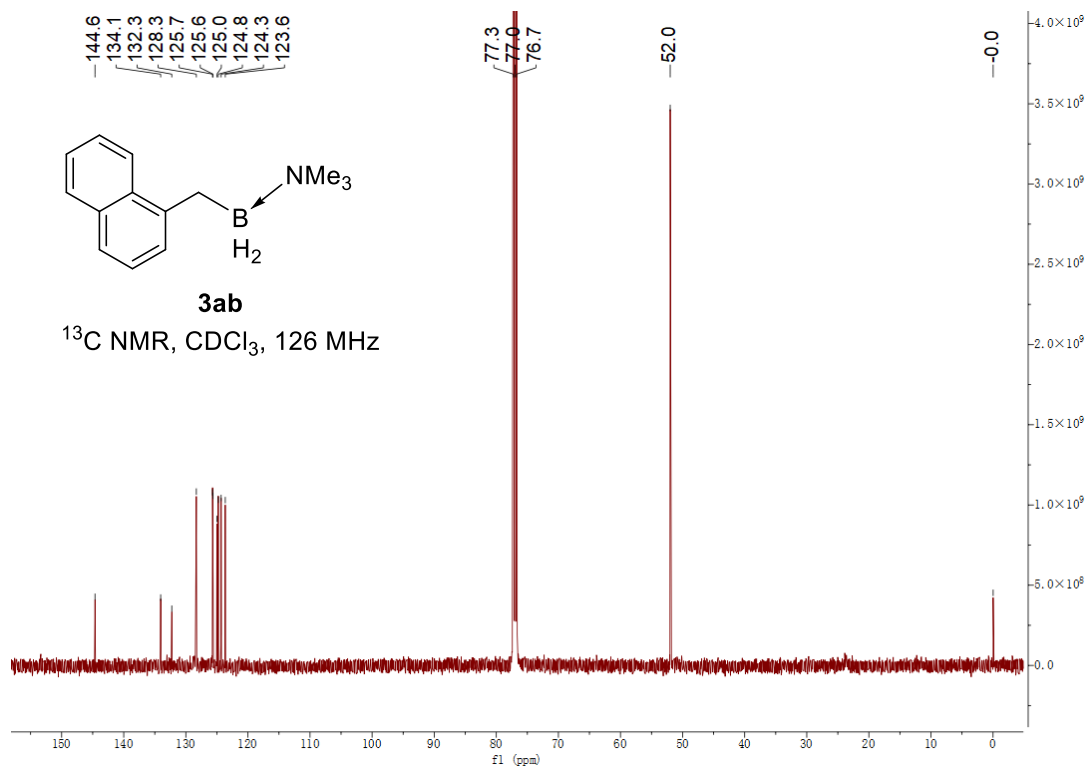

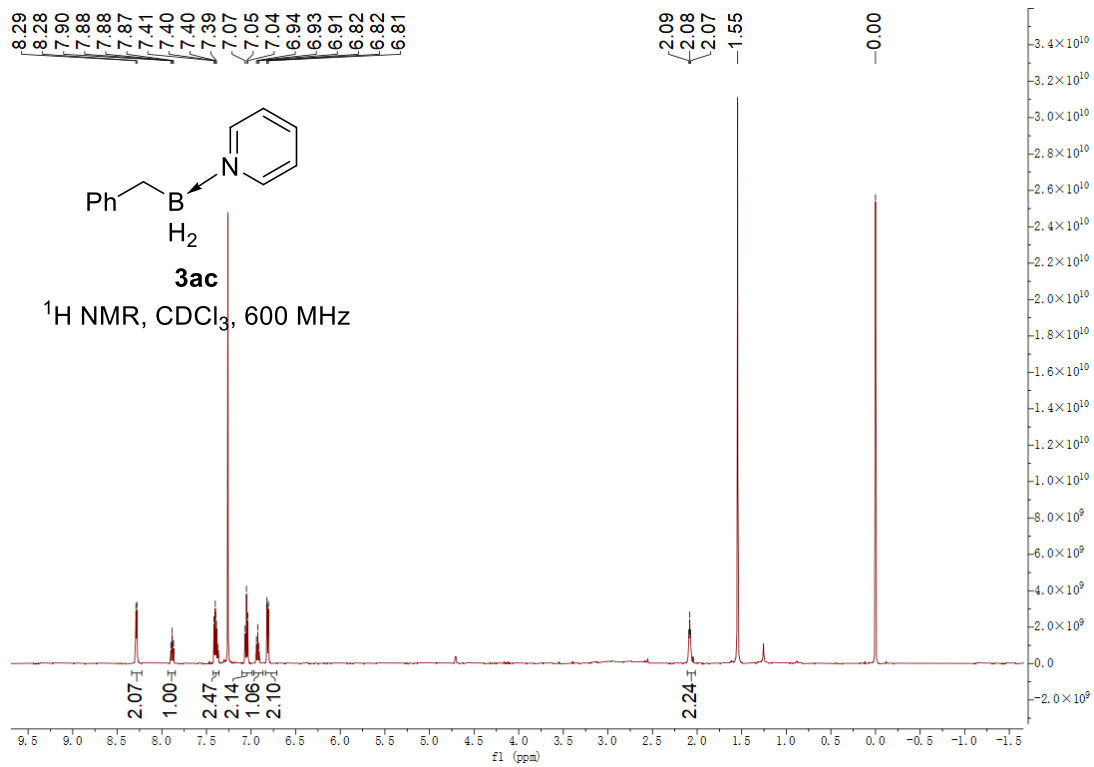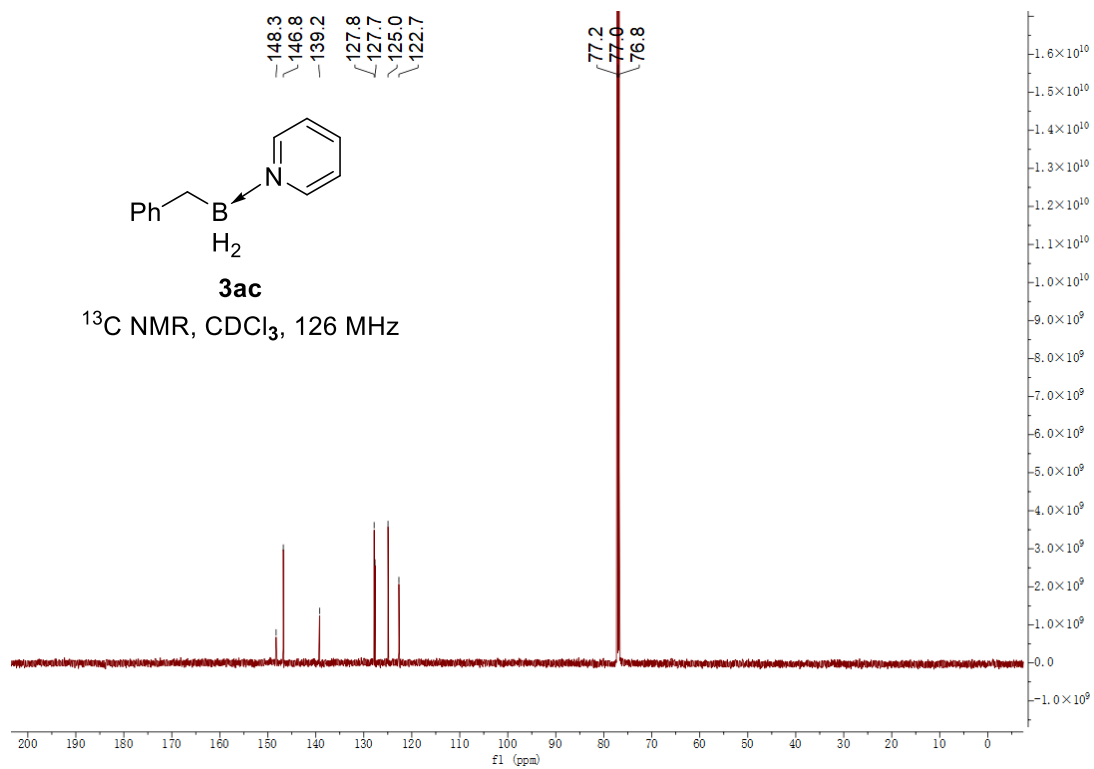

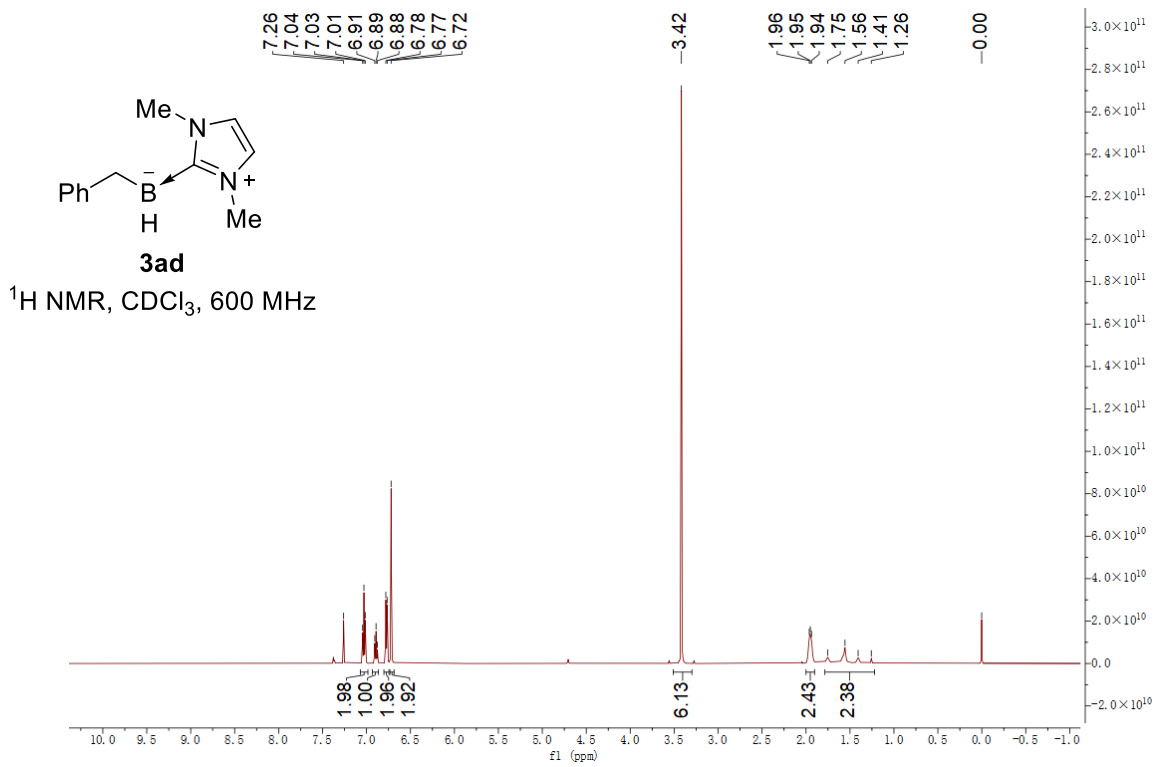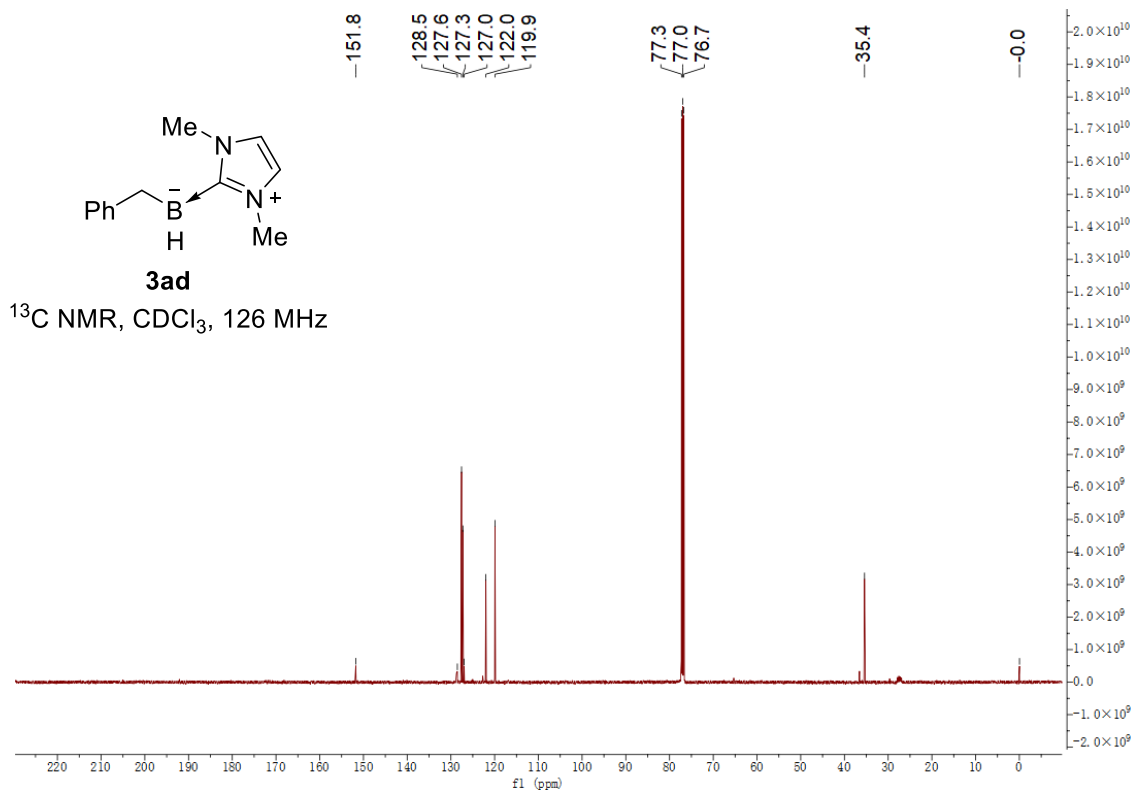



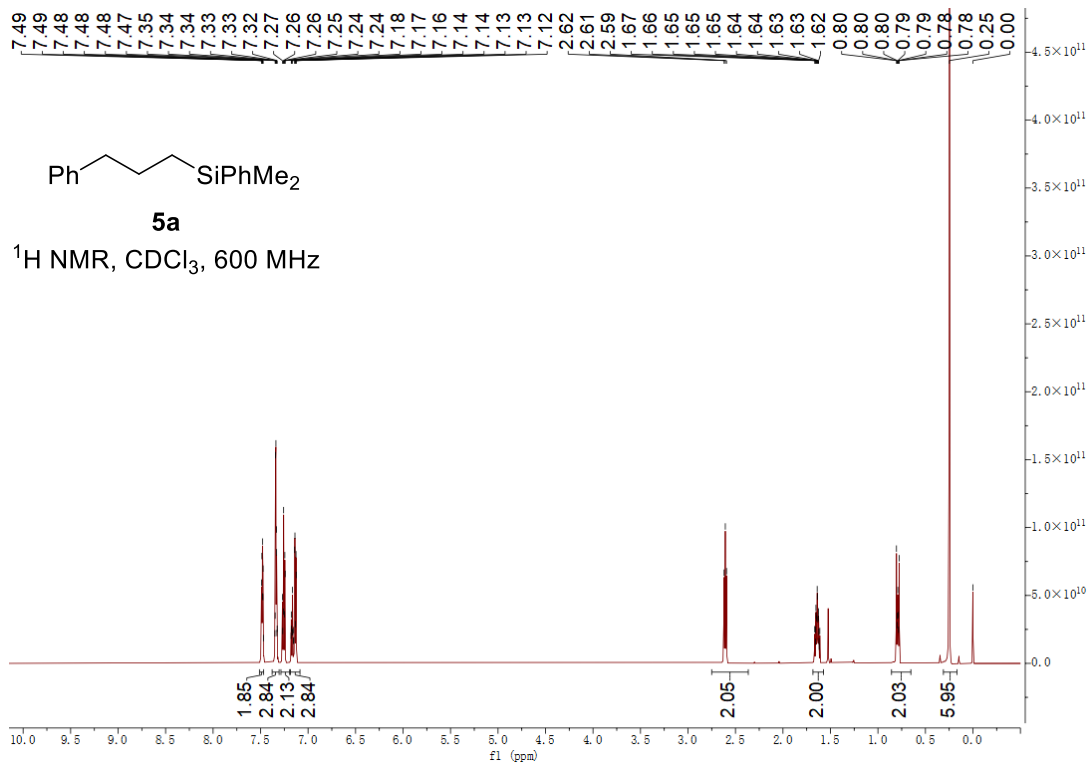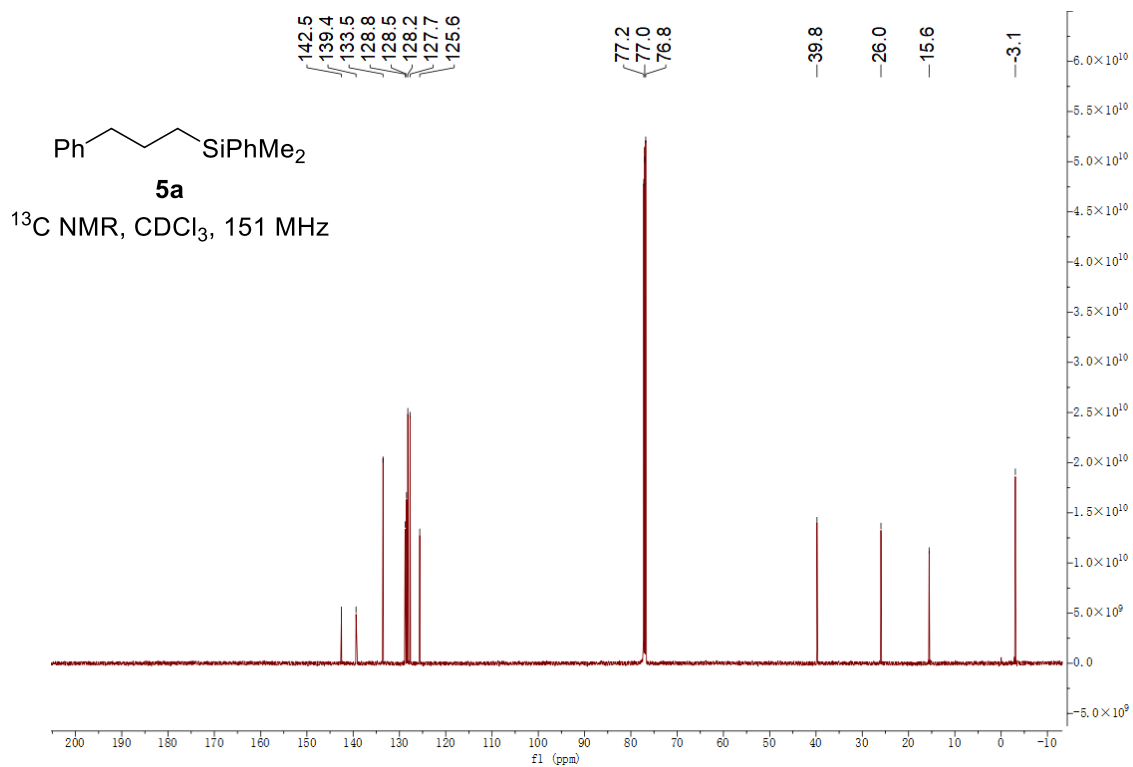

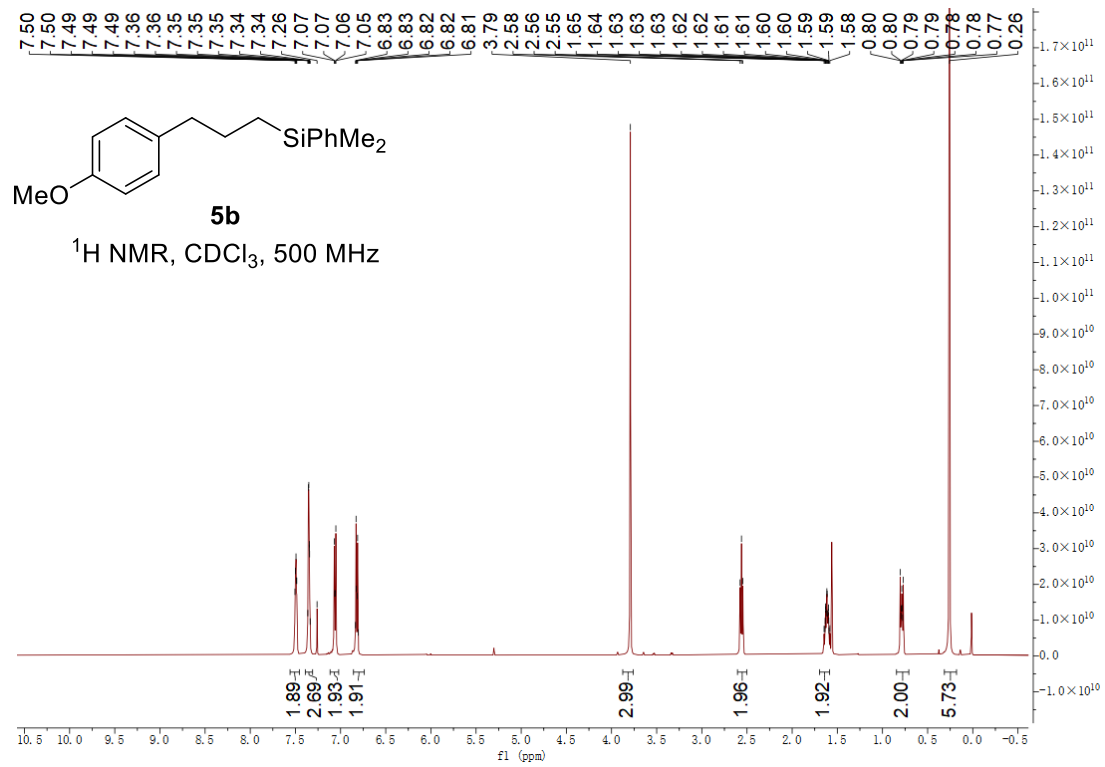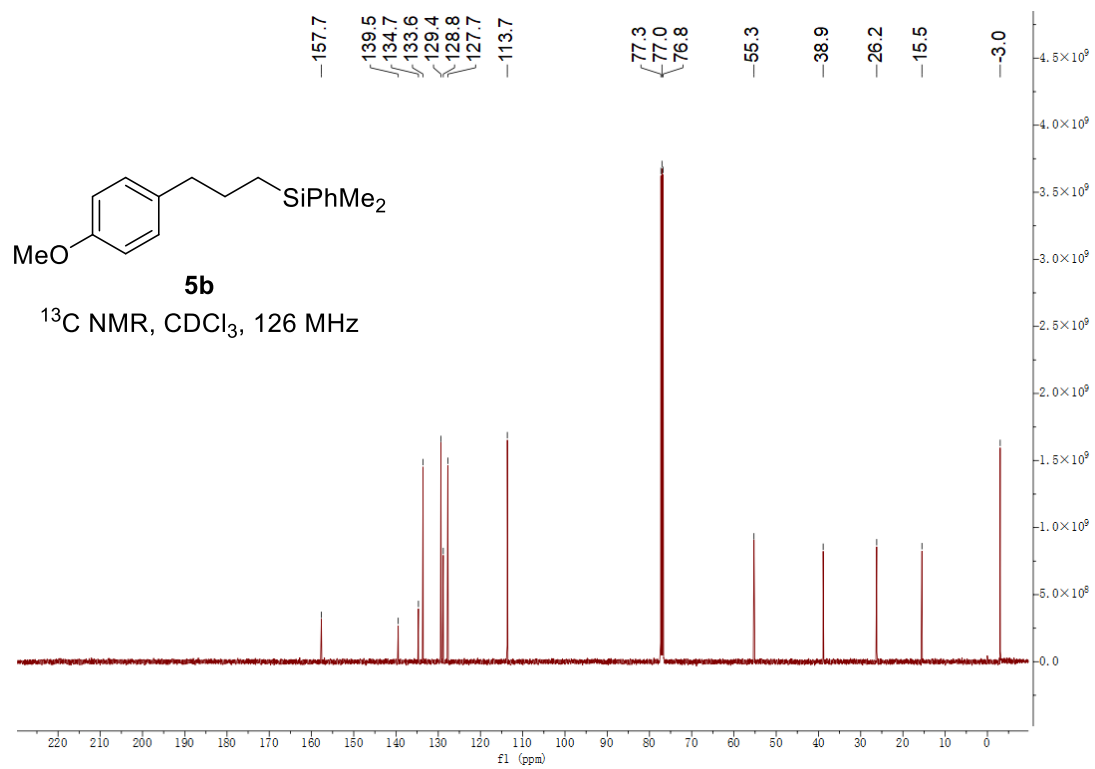

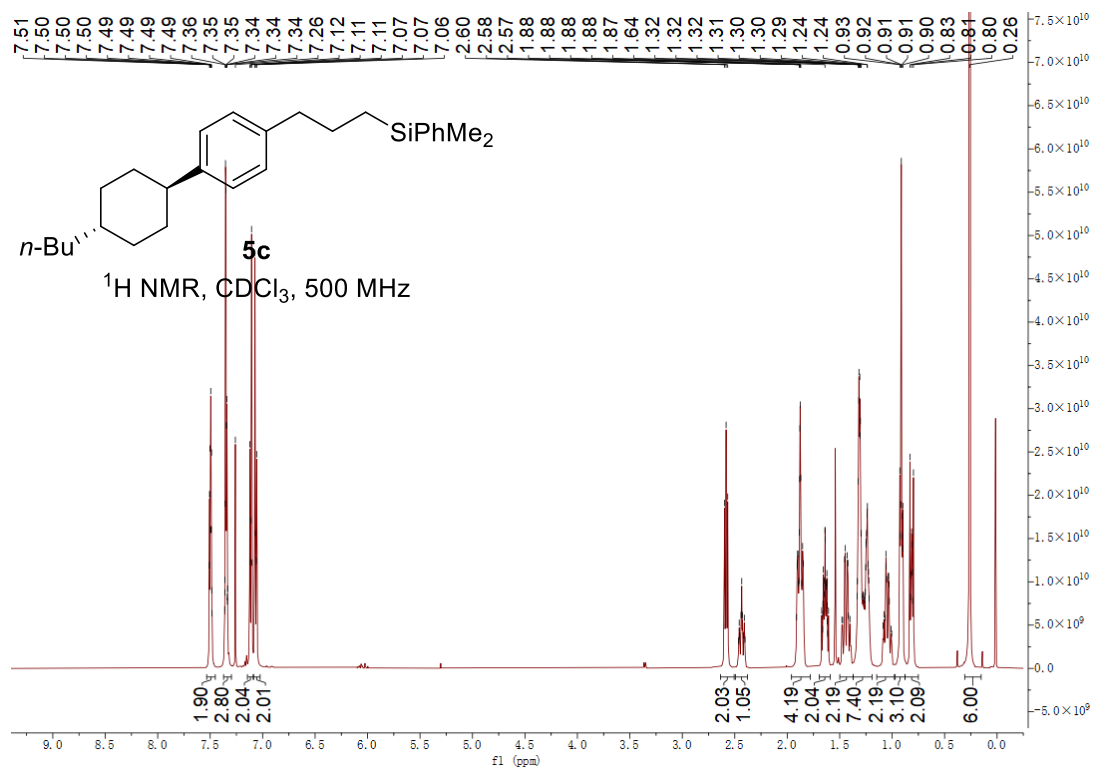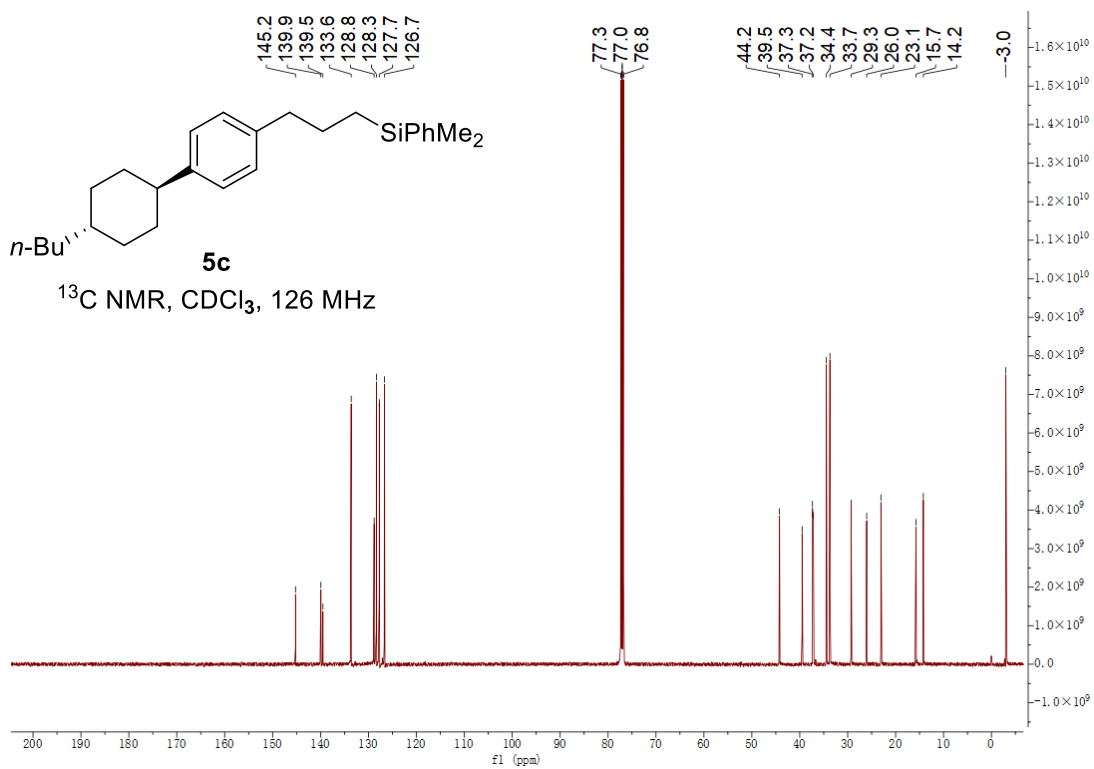

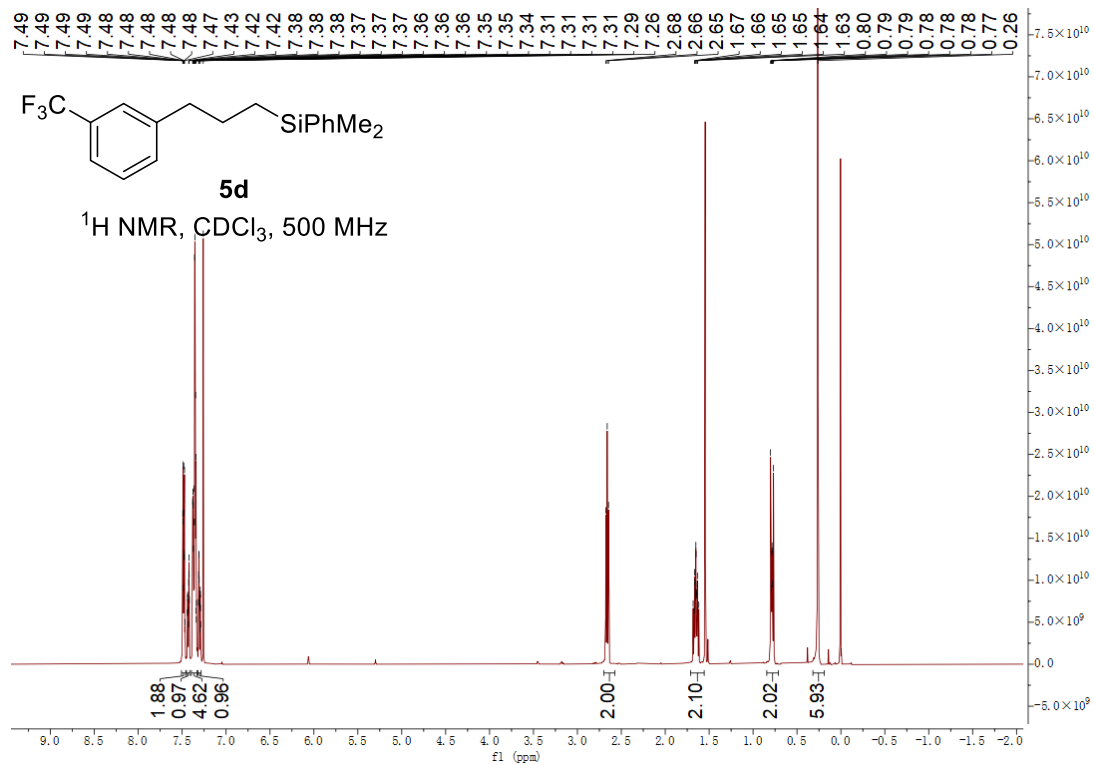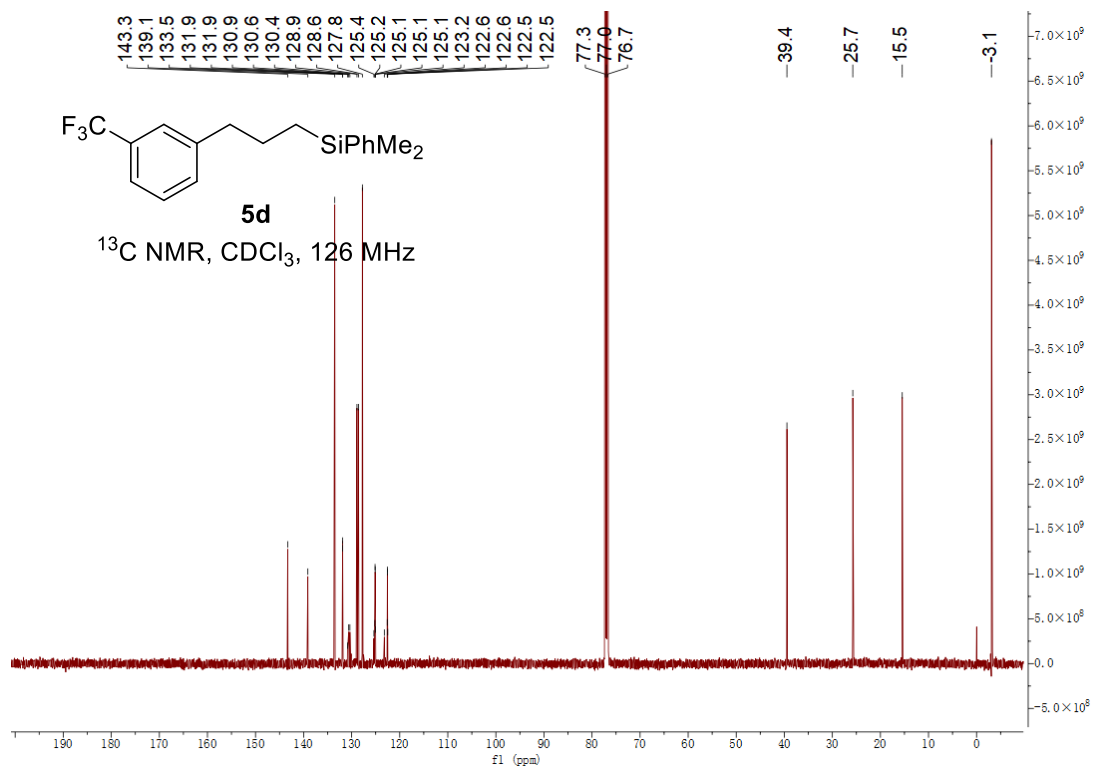

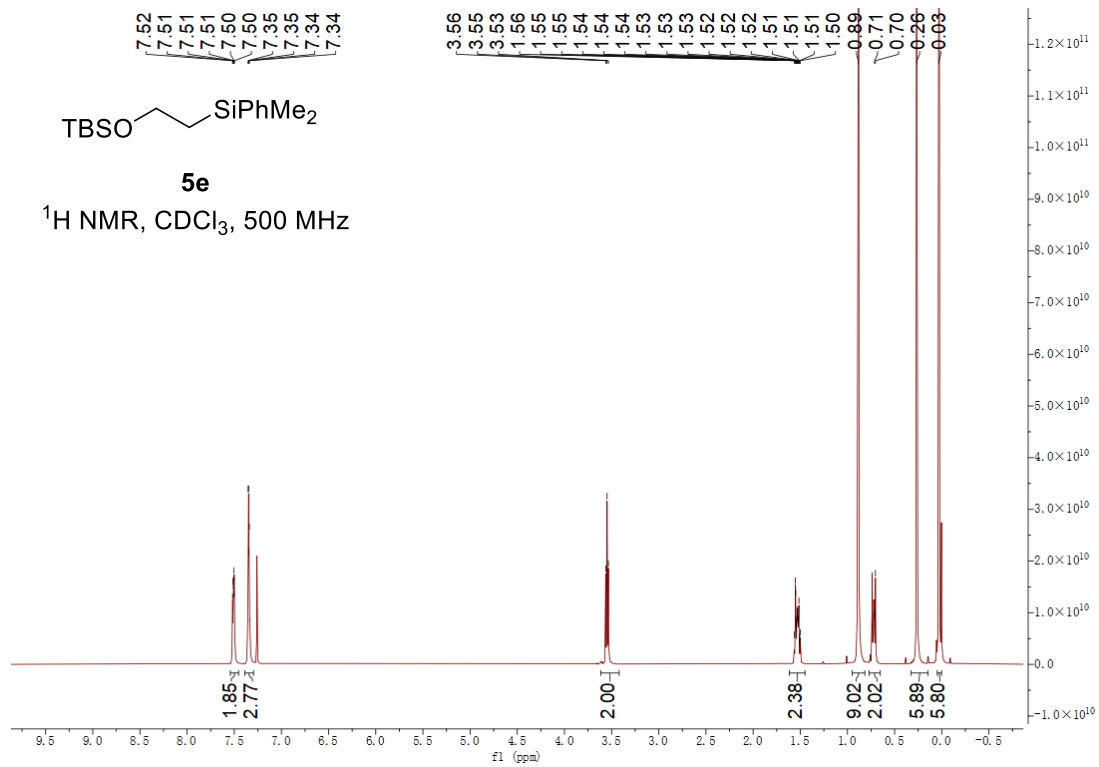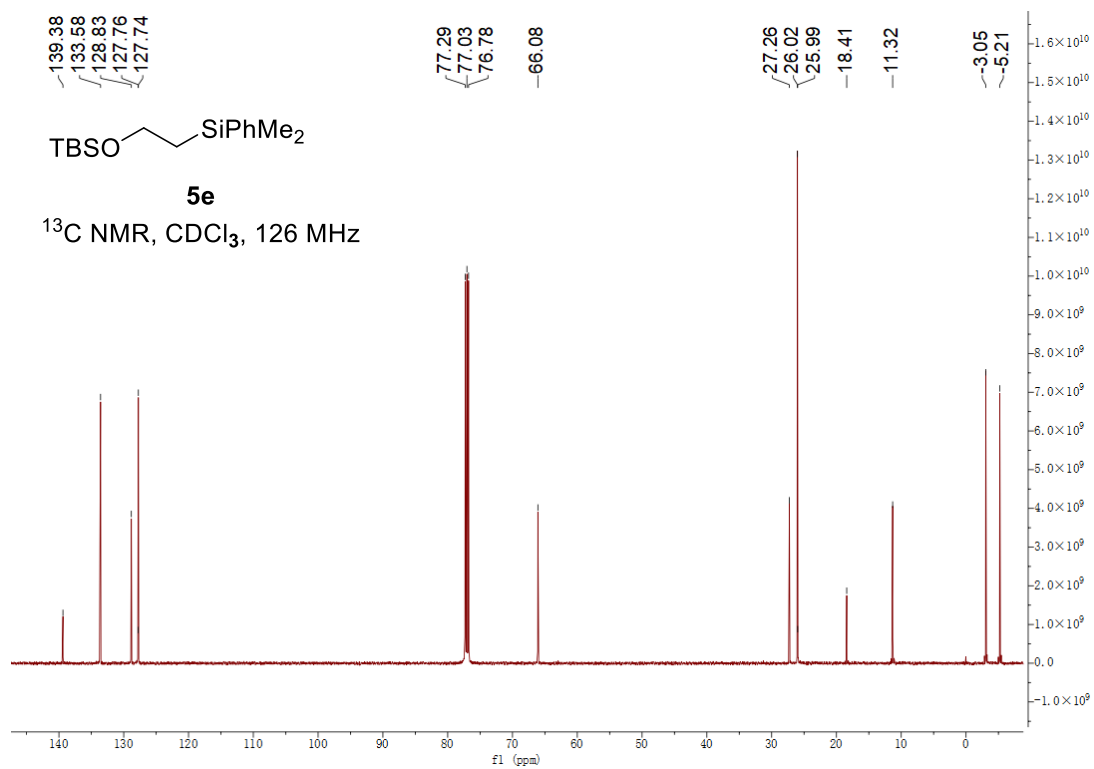

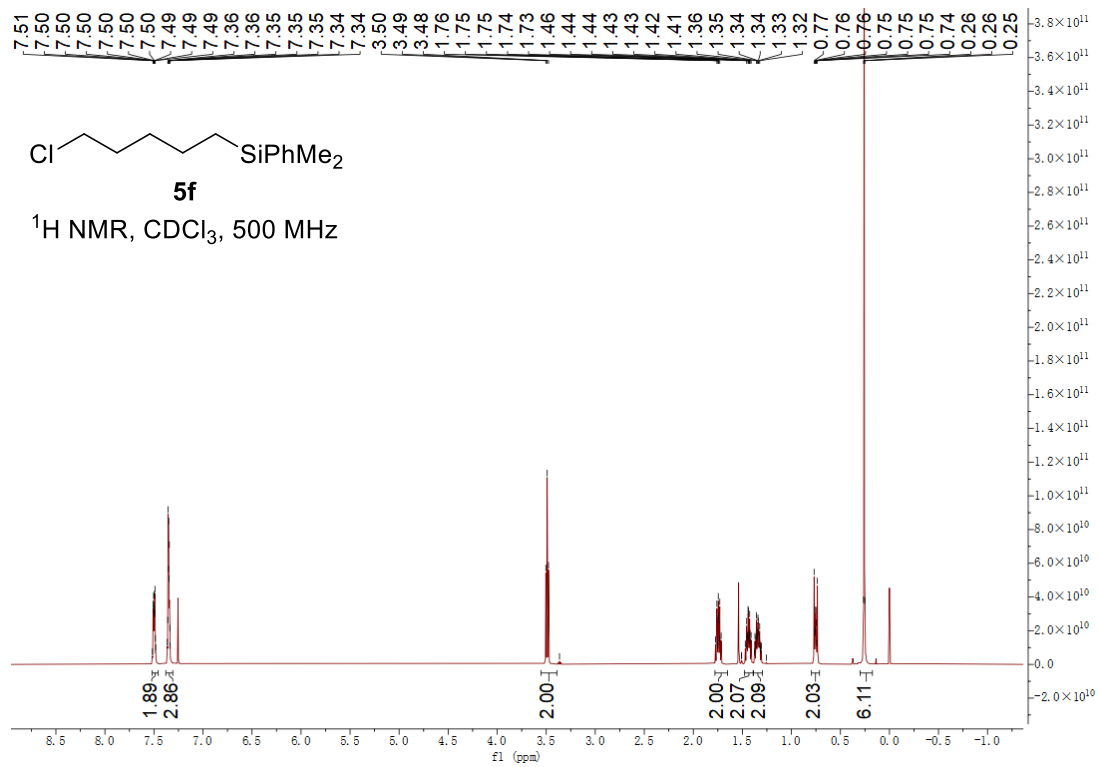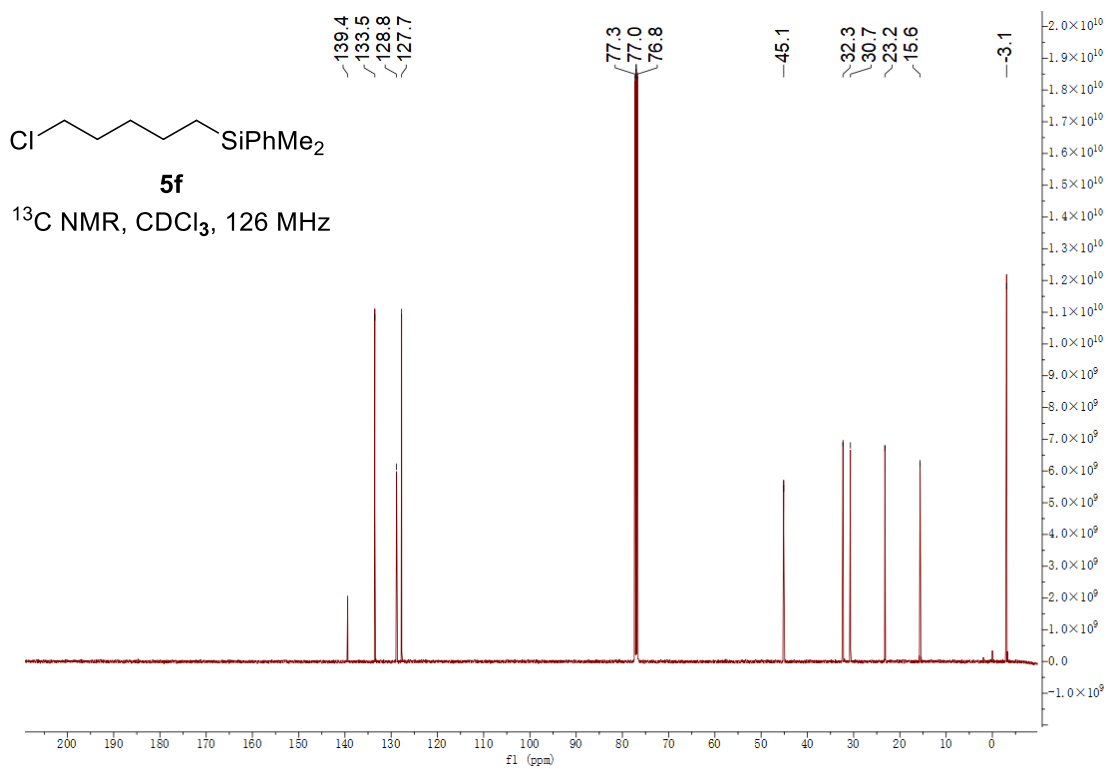

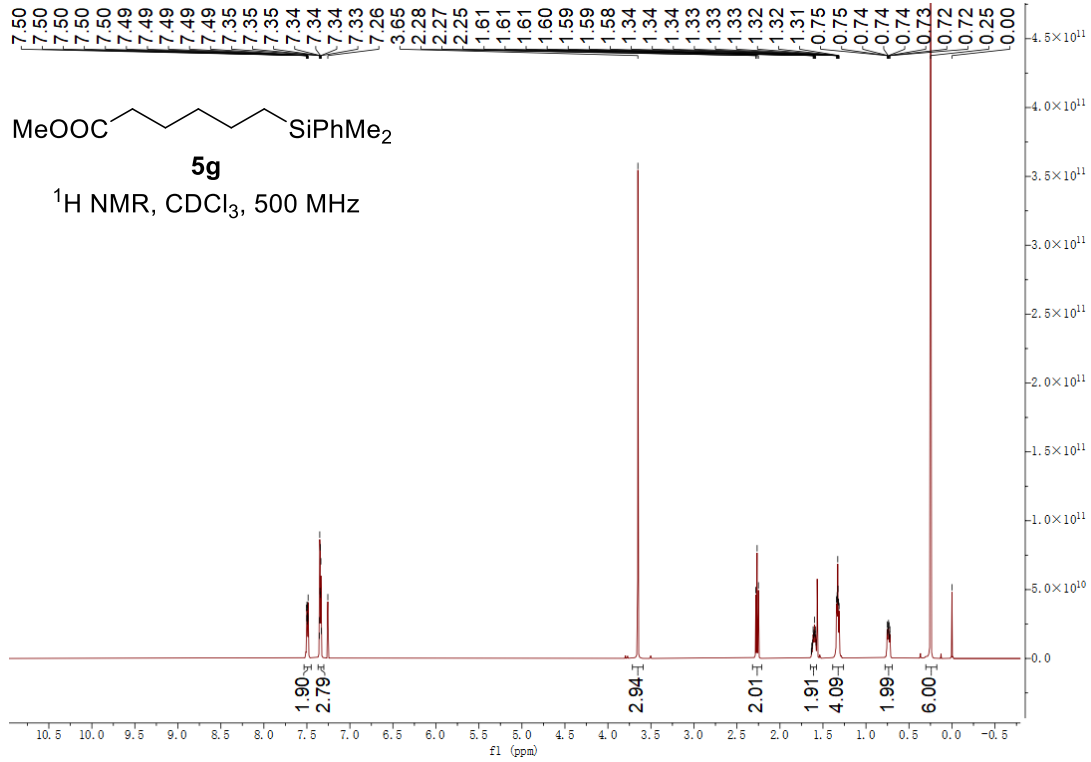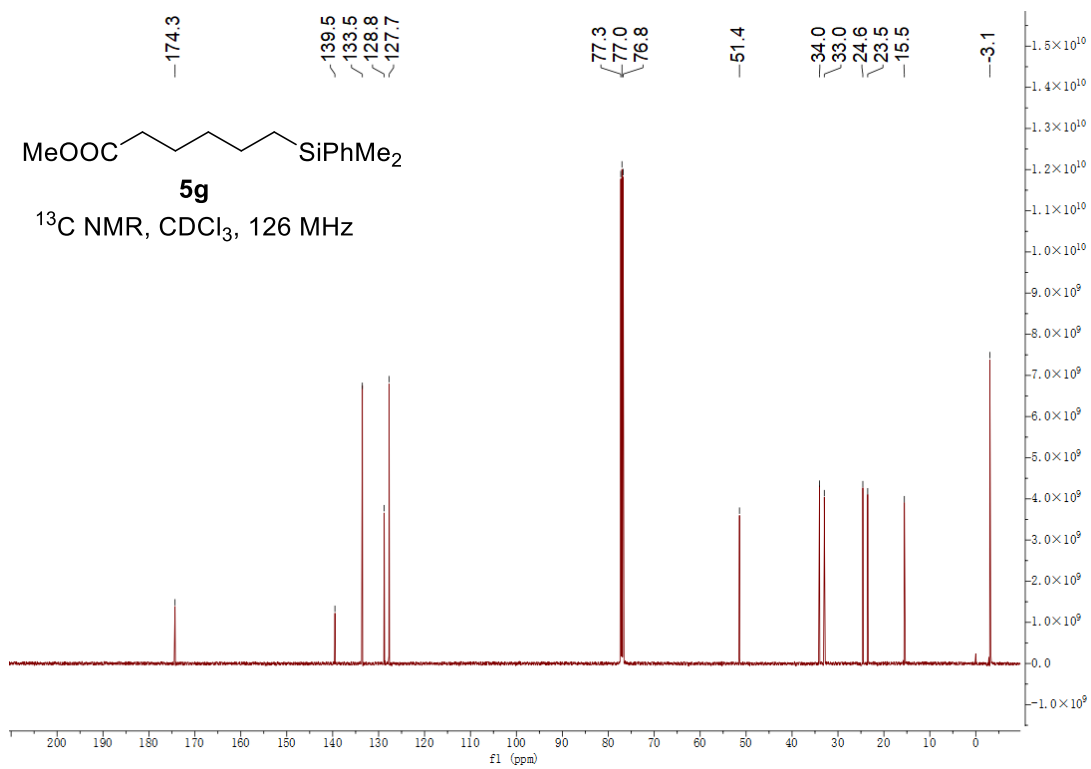

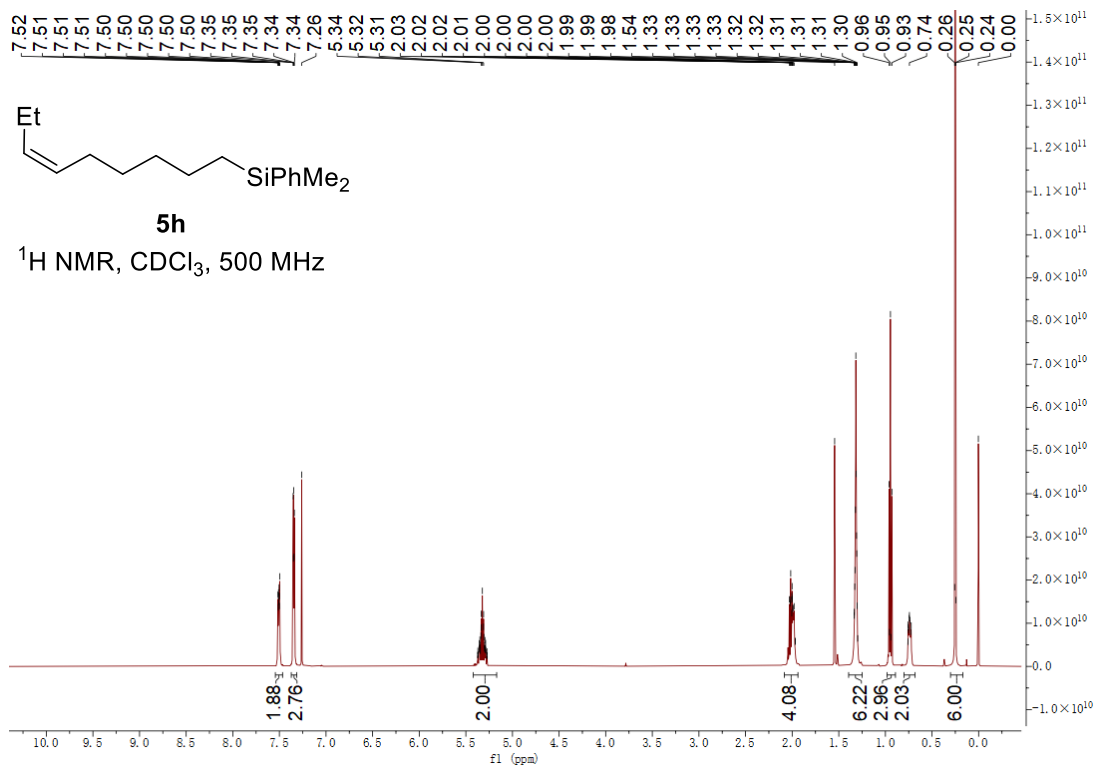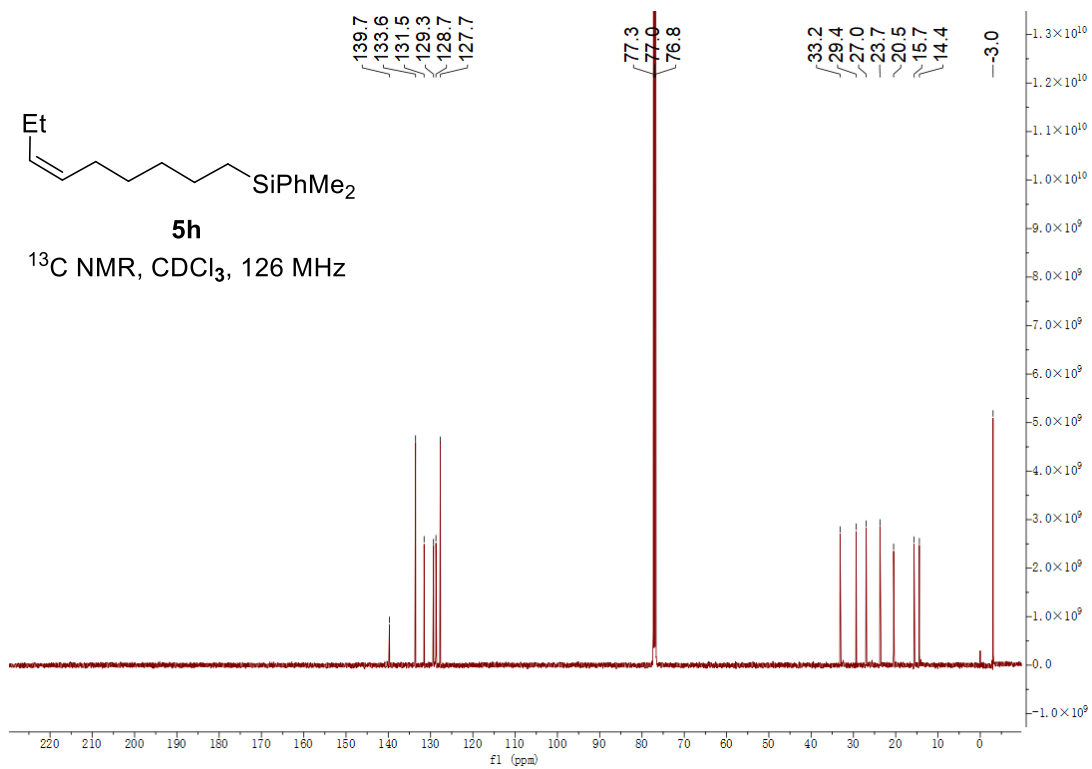



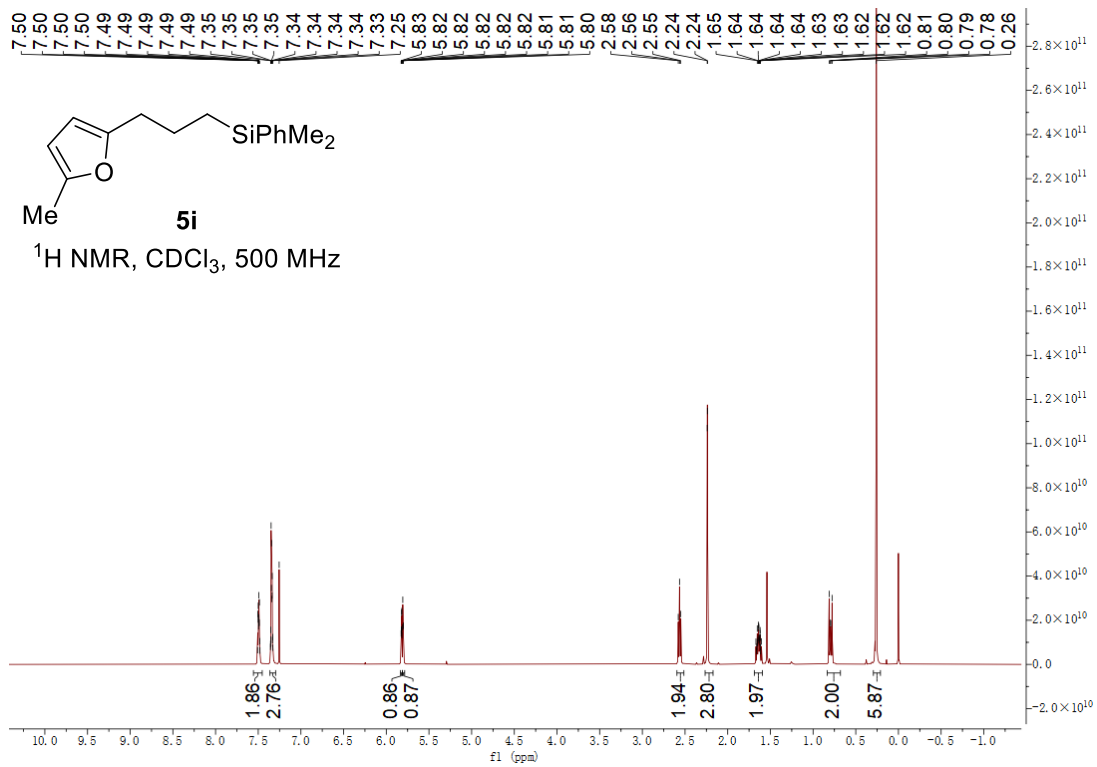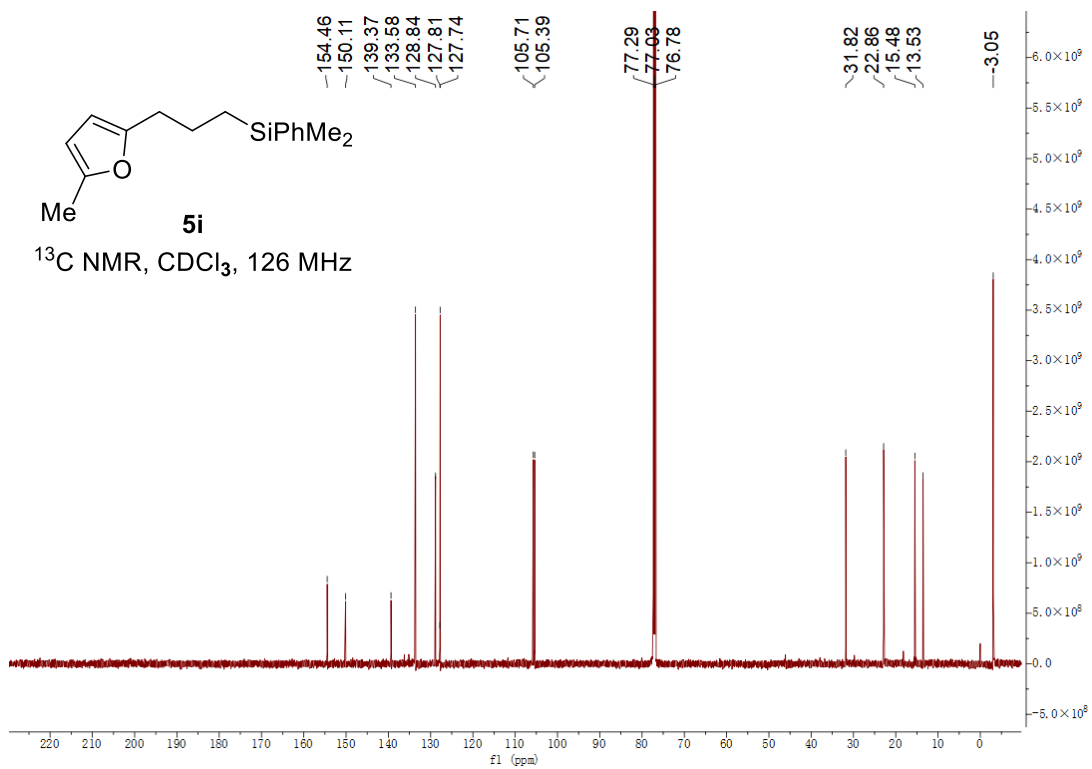

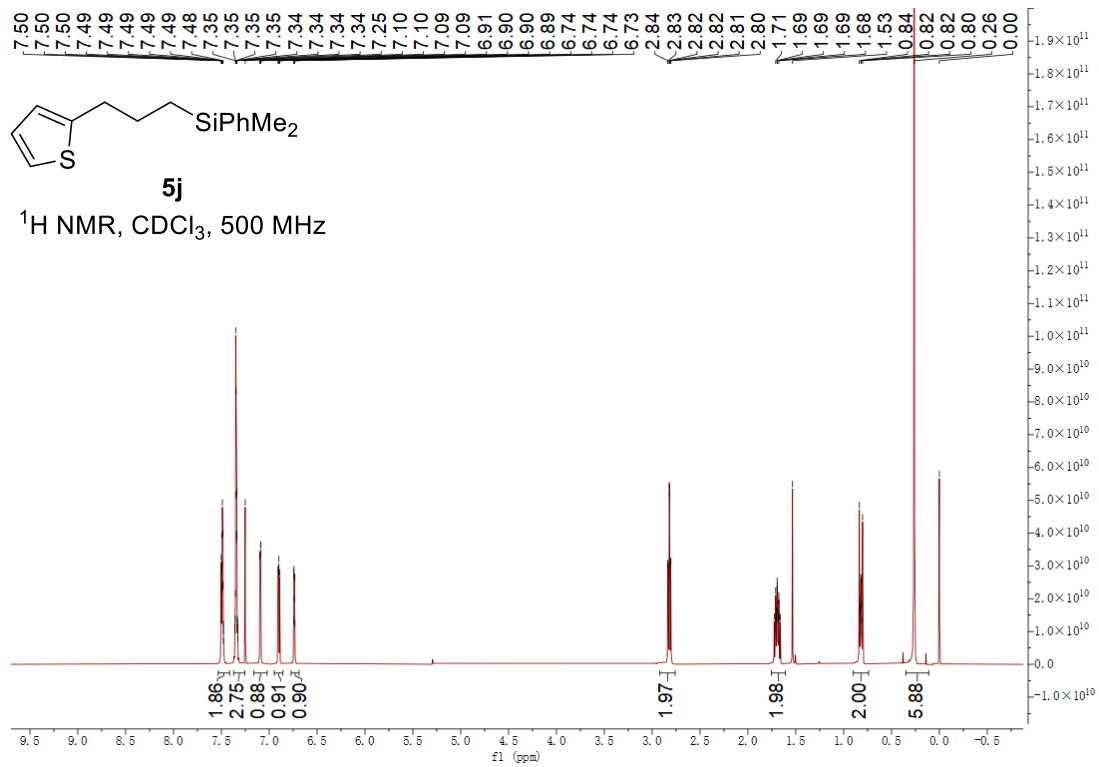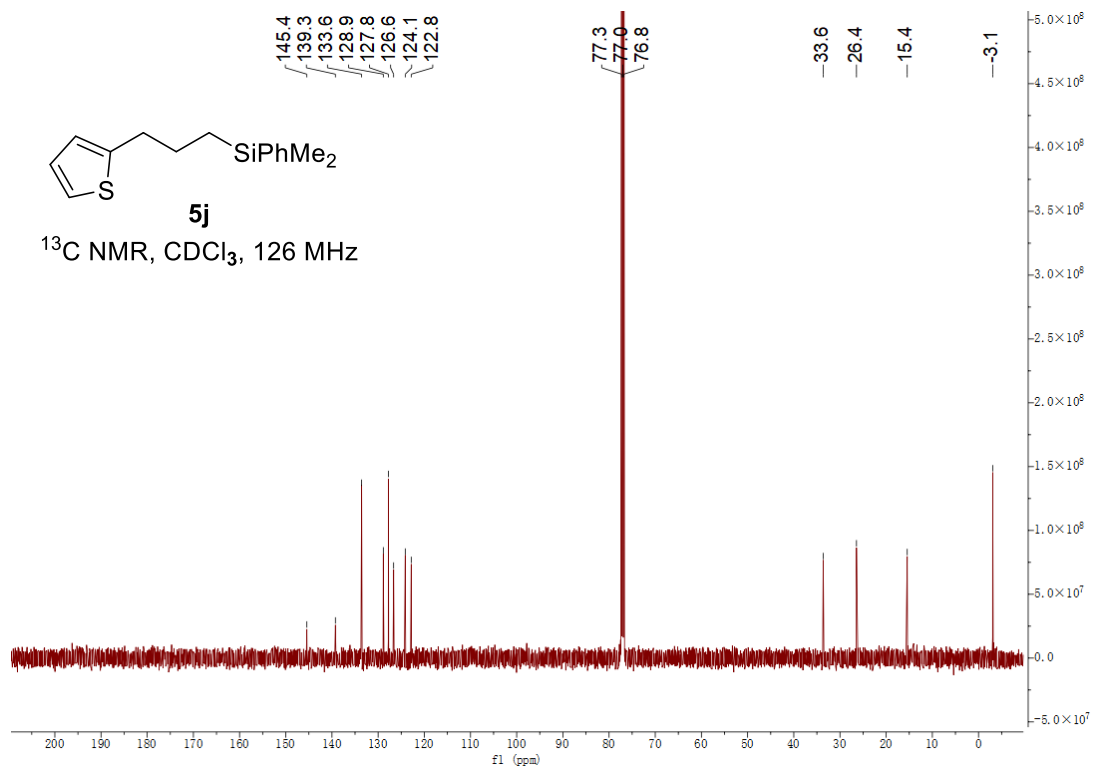

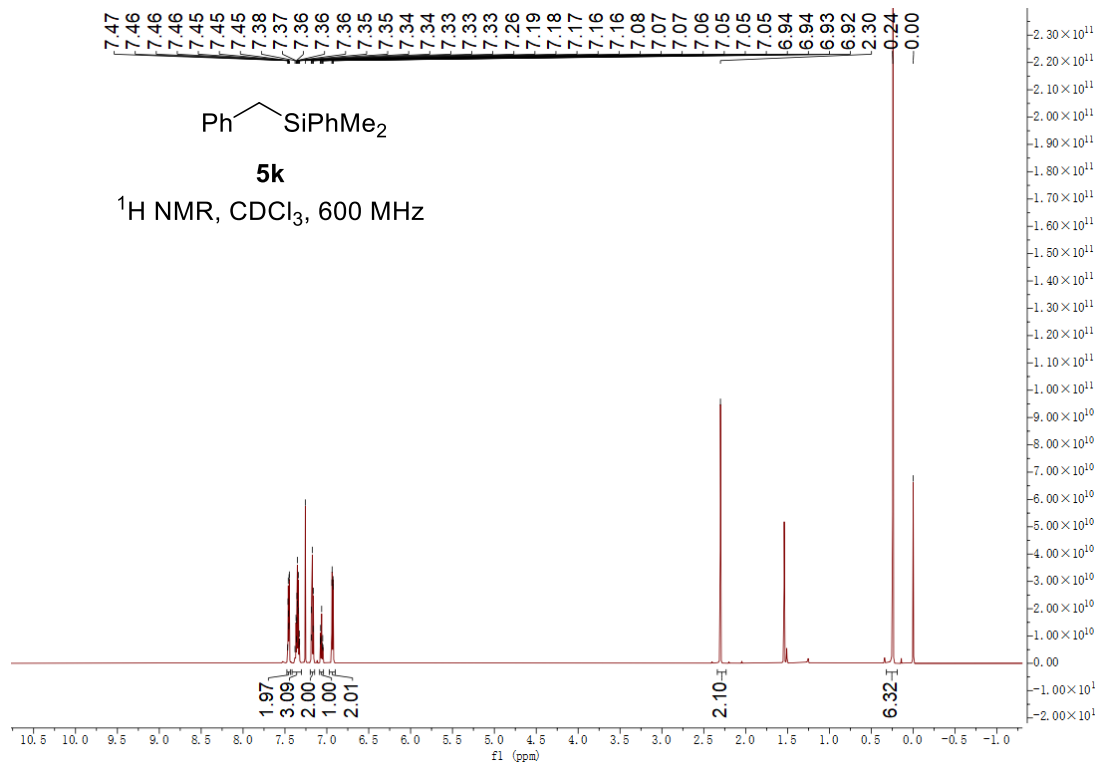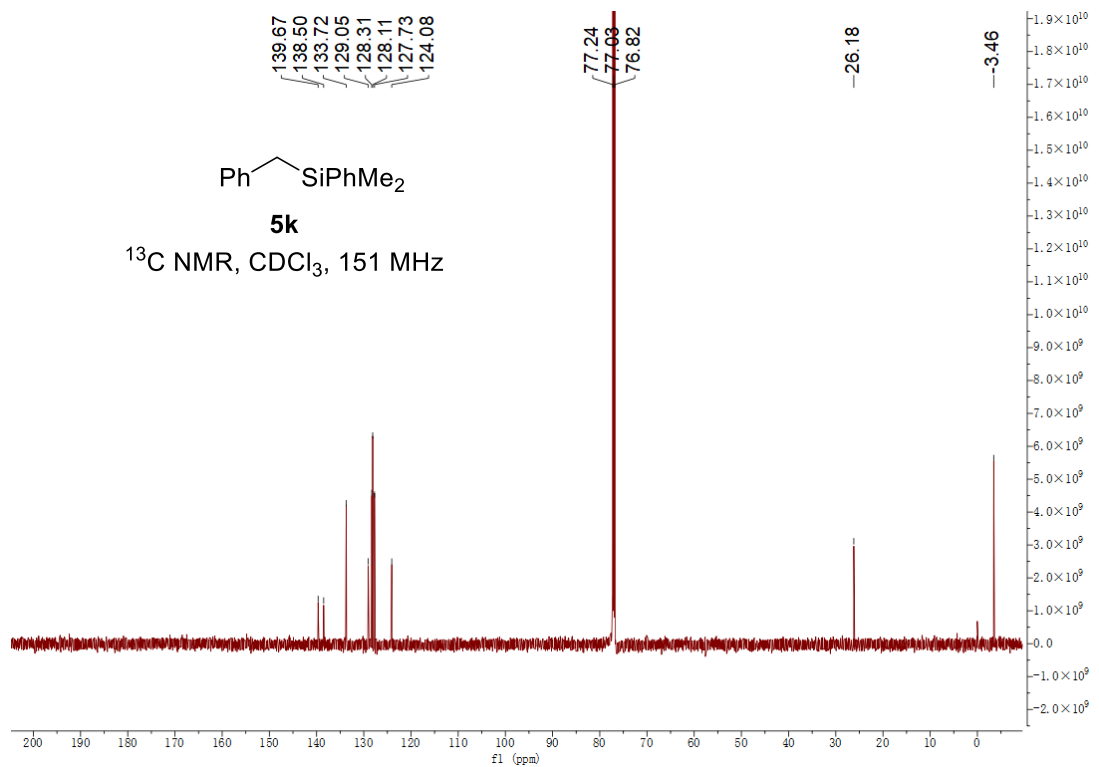

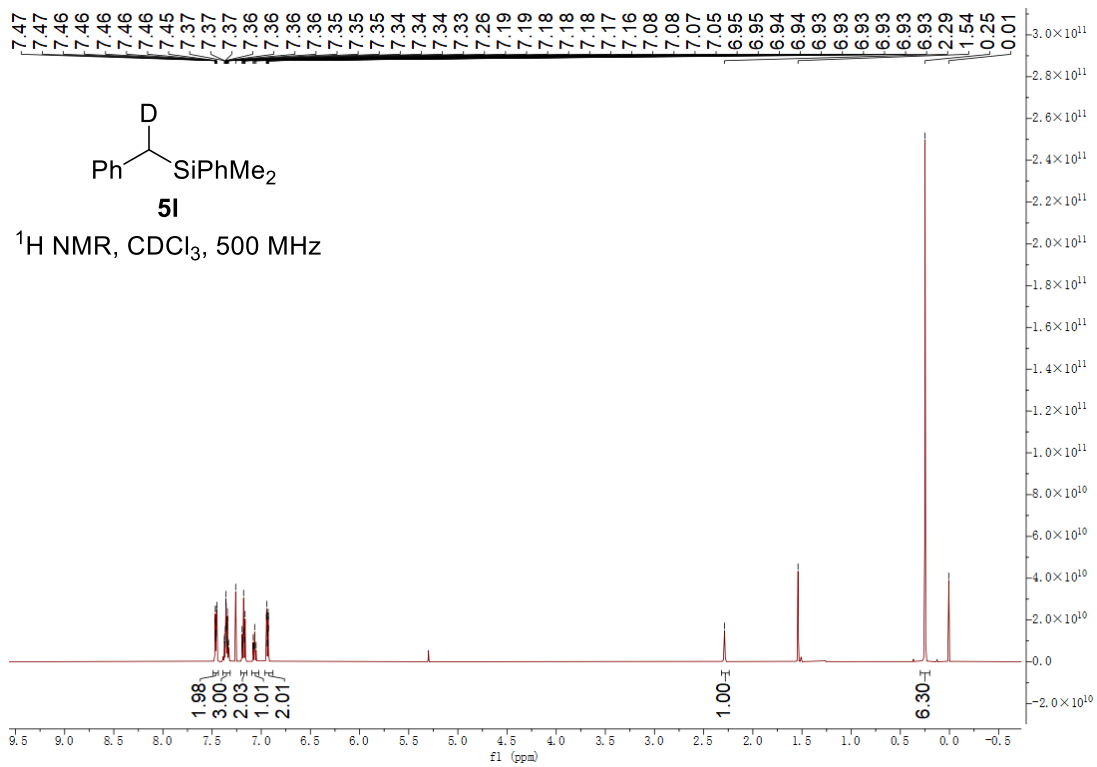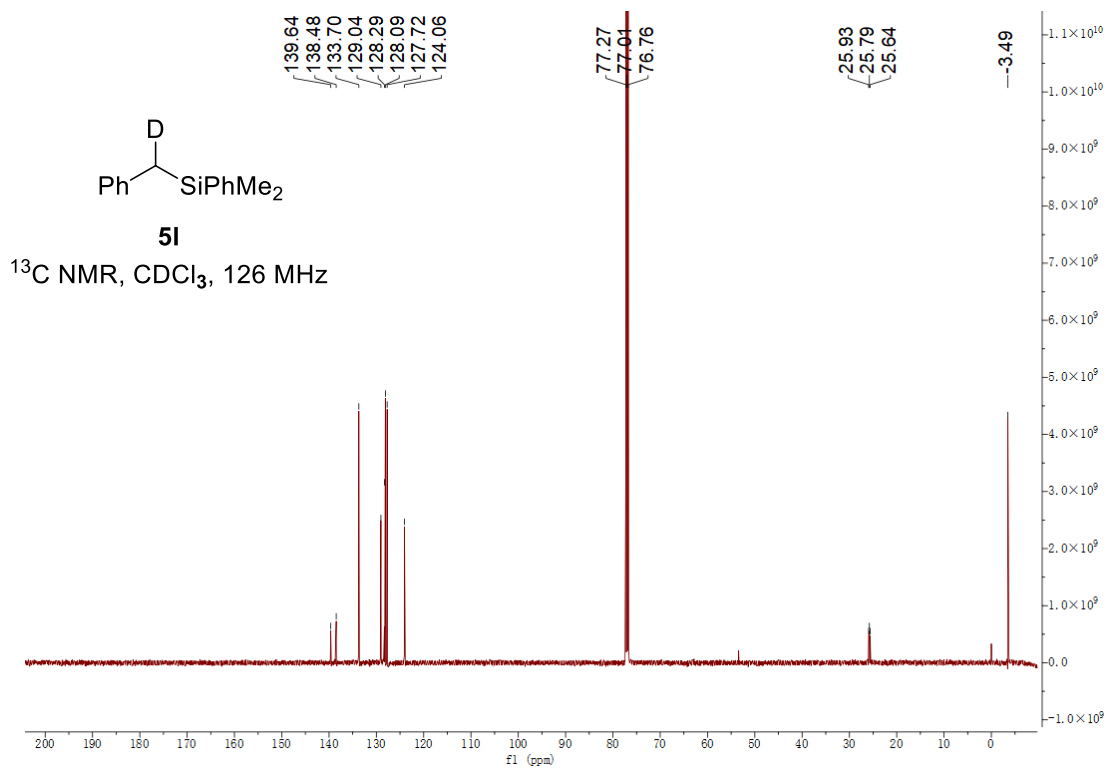

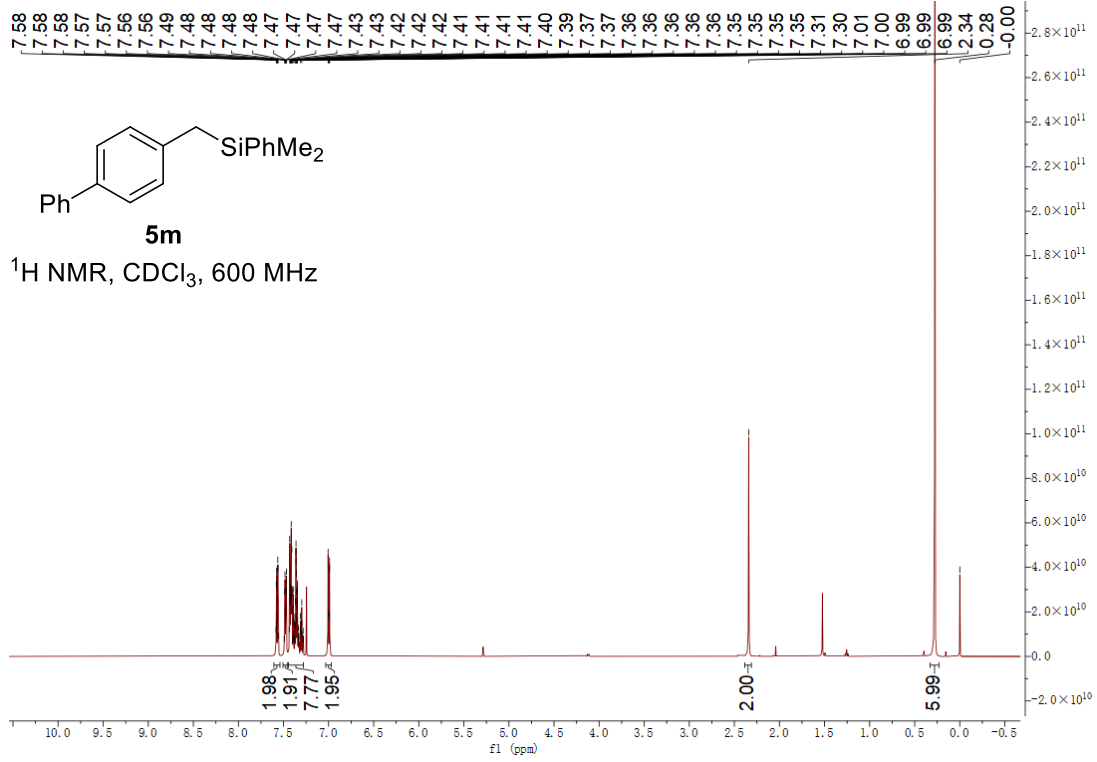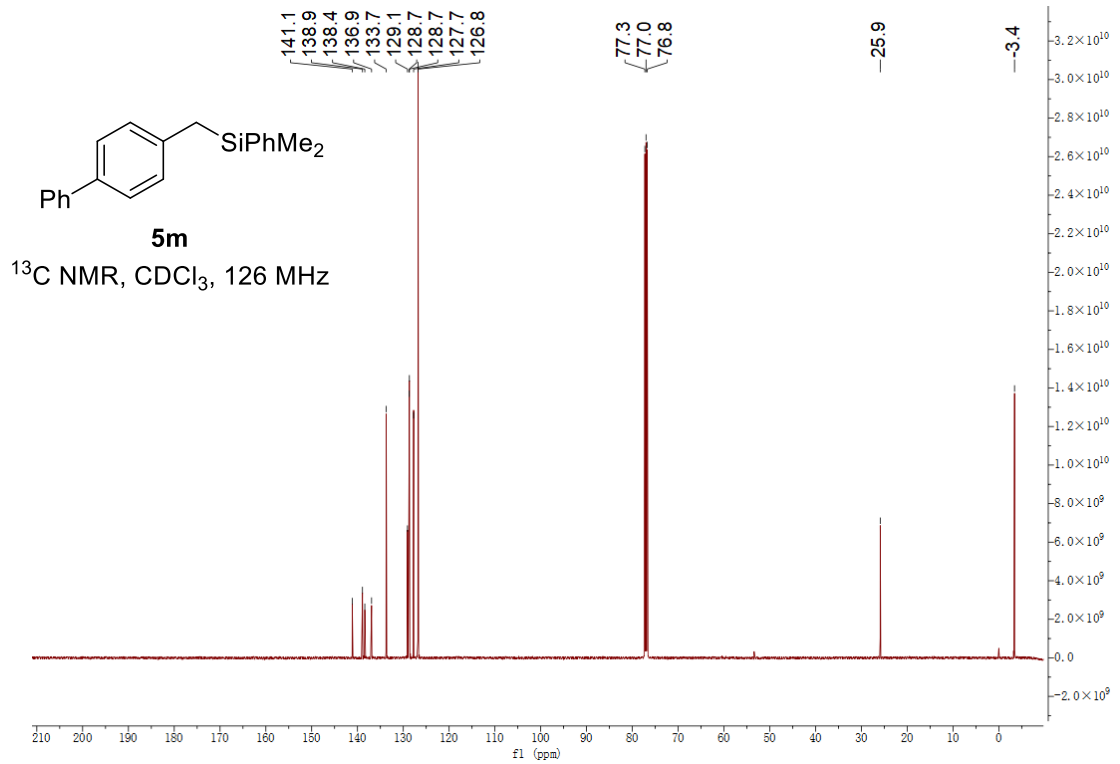

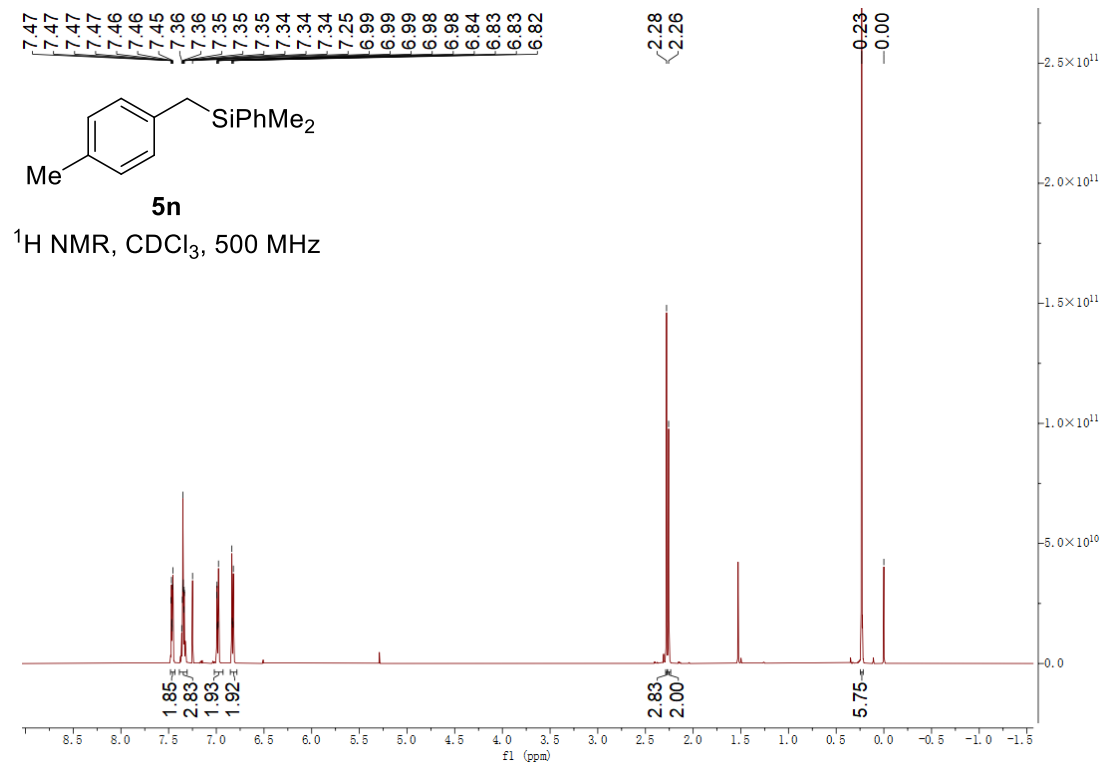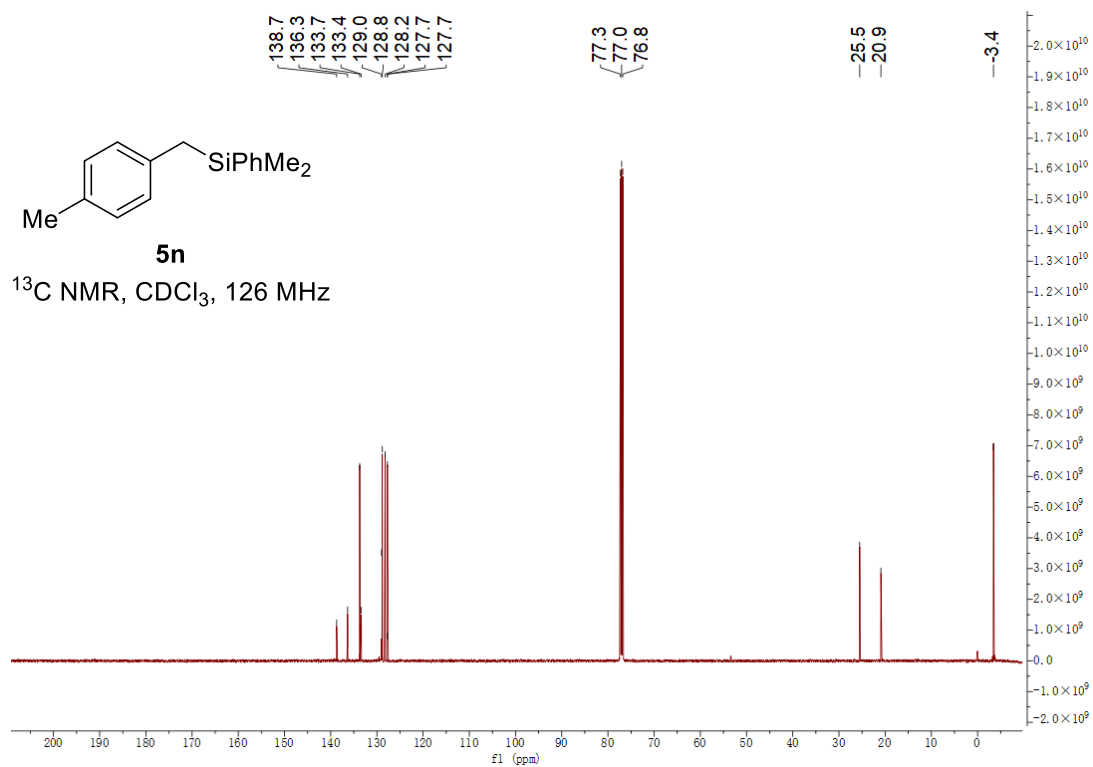

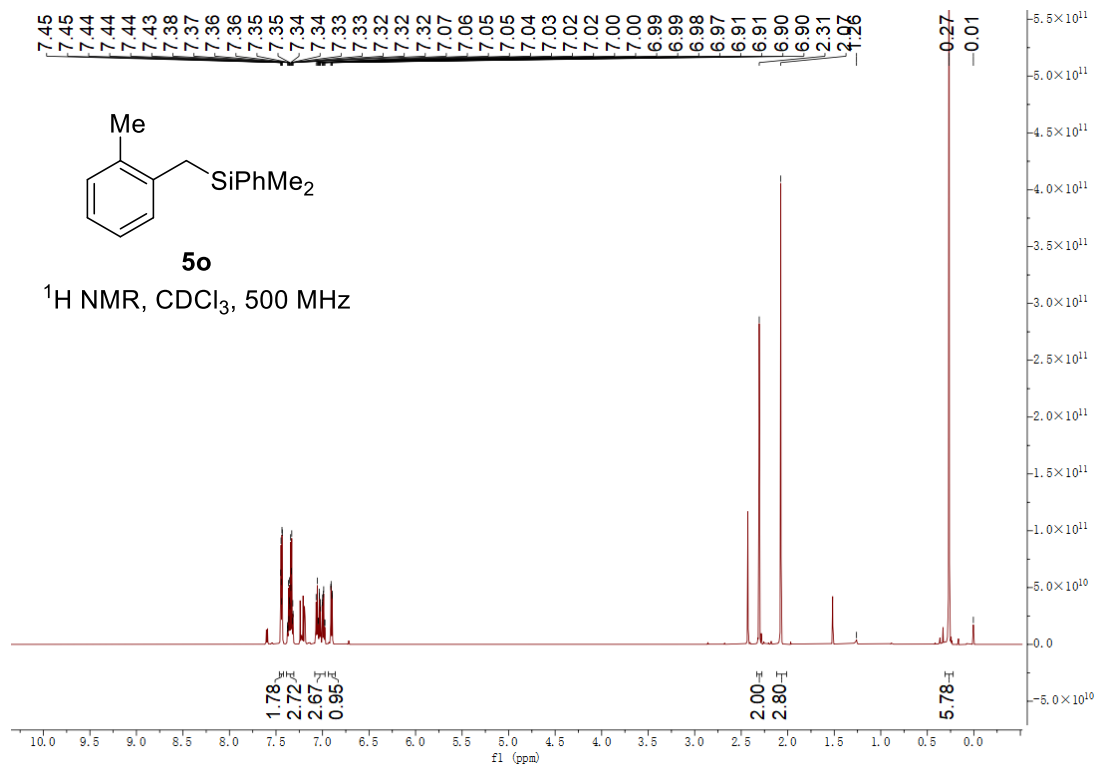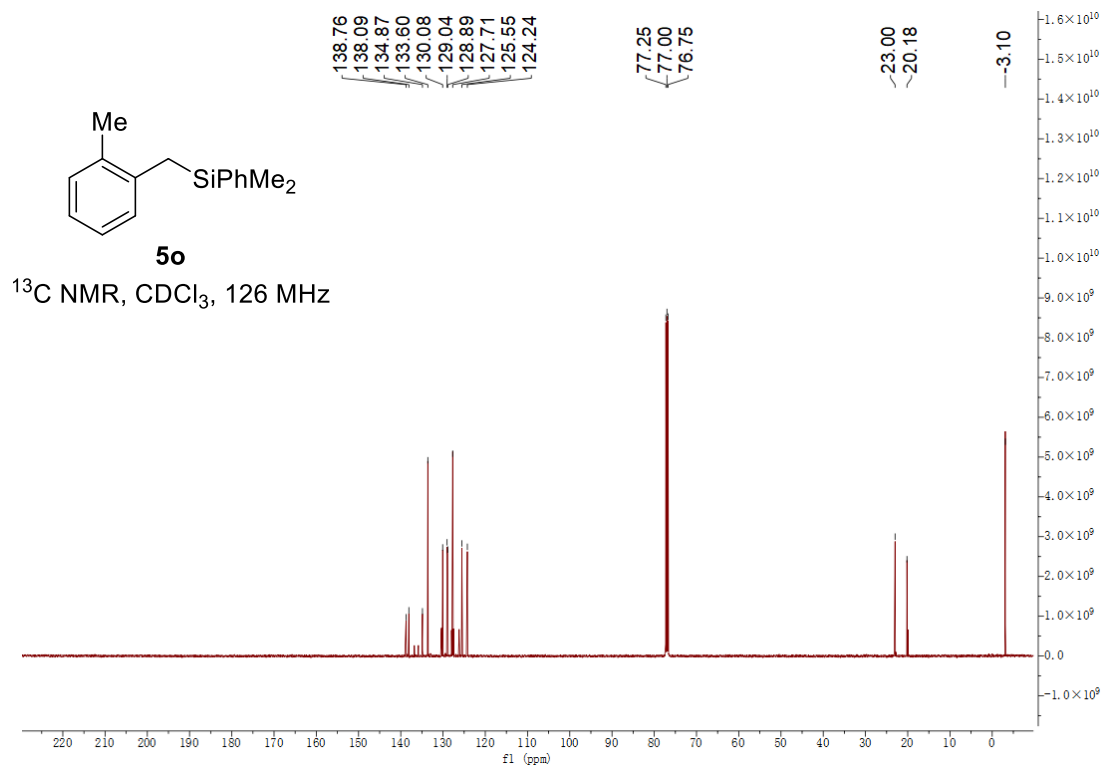

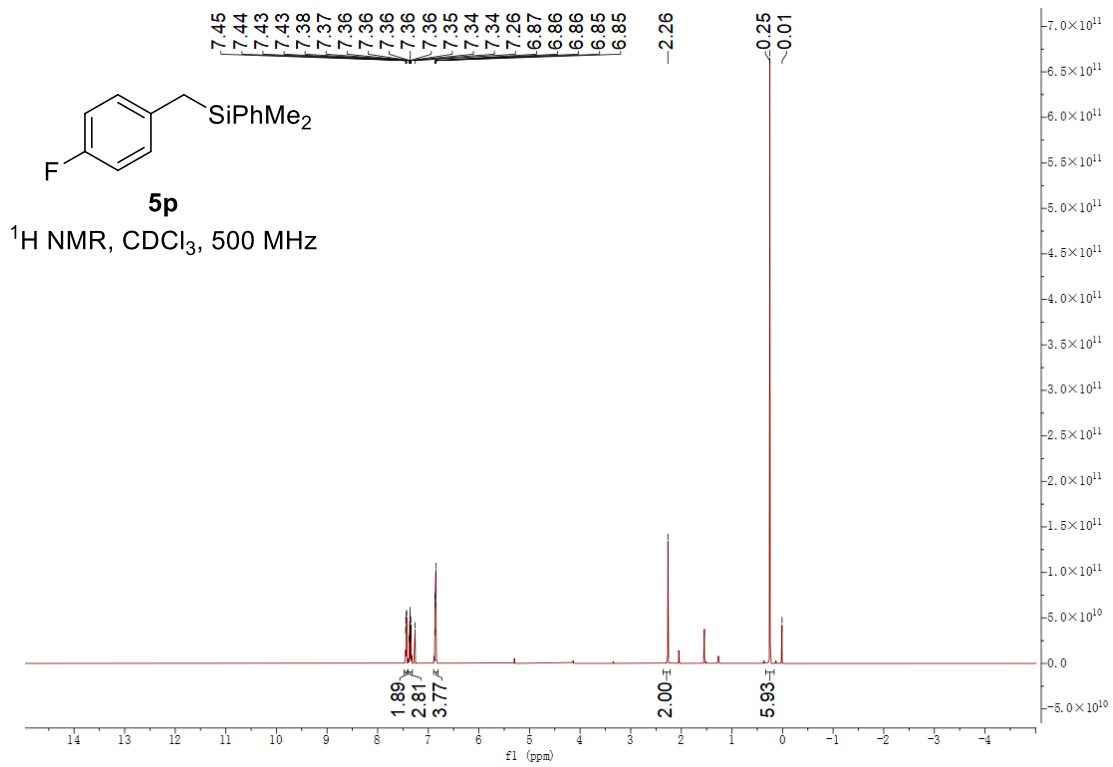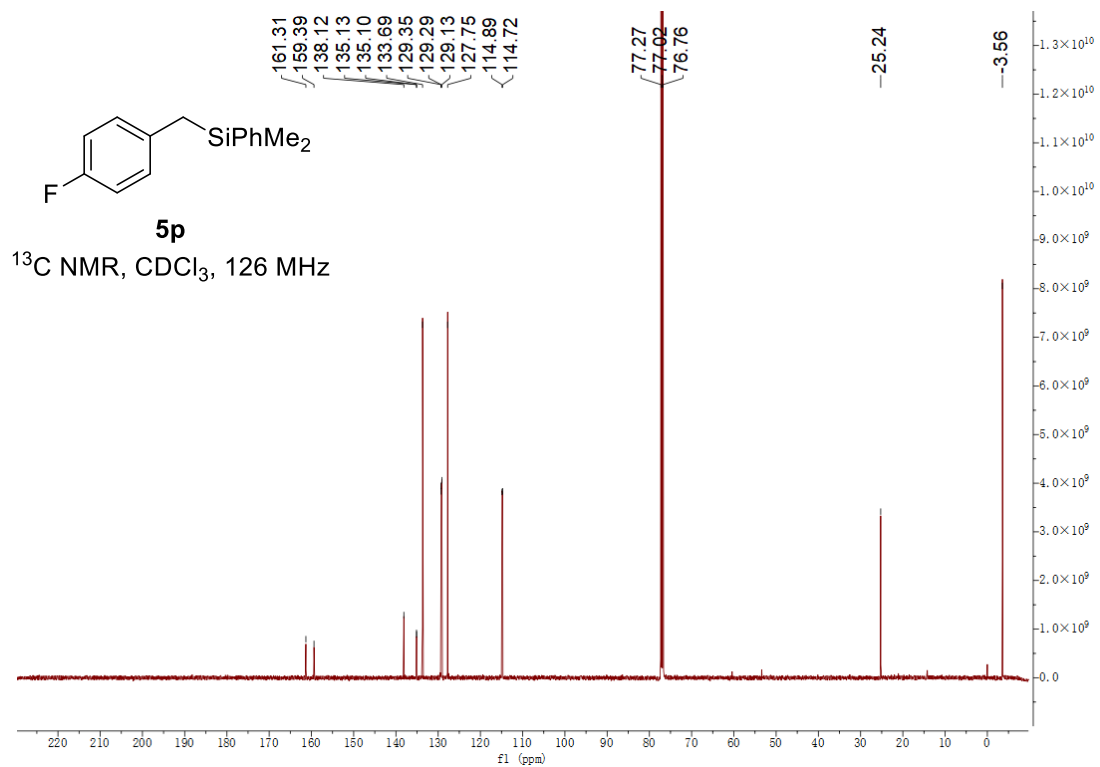



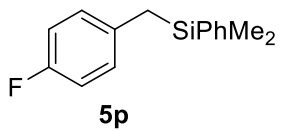

$^{19}\text{F}$  NMR,  $\text{CDCl}_3$ , 565 MHz

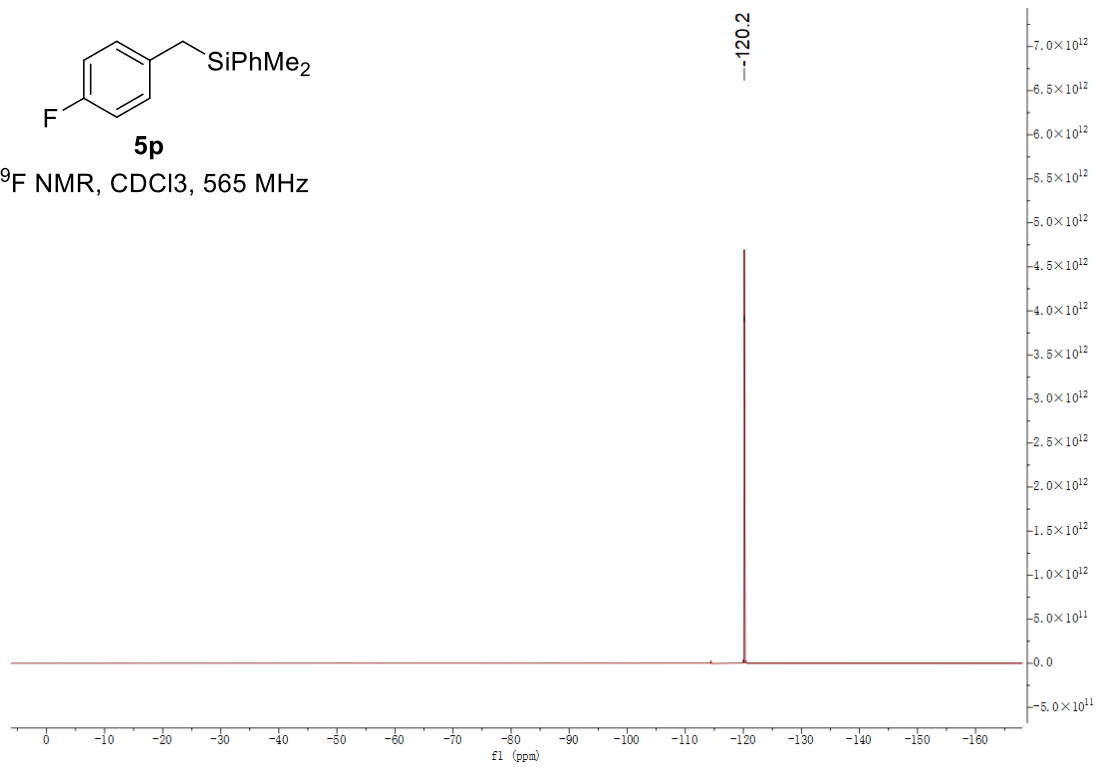

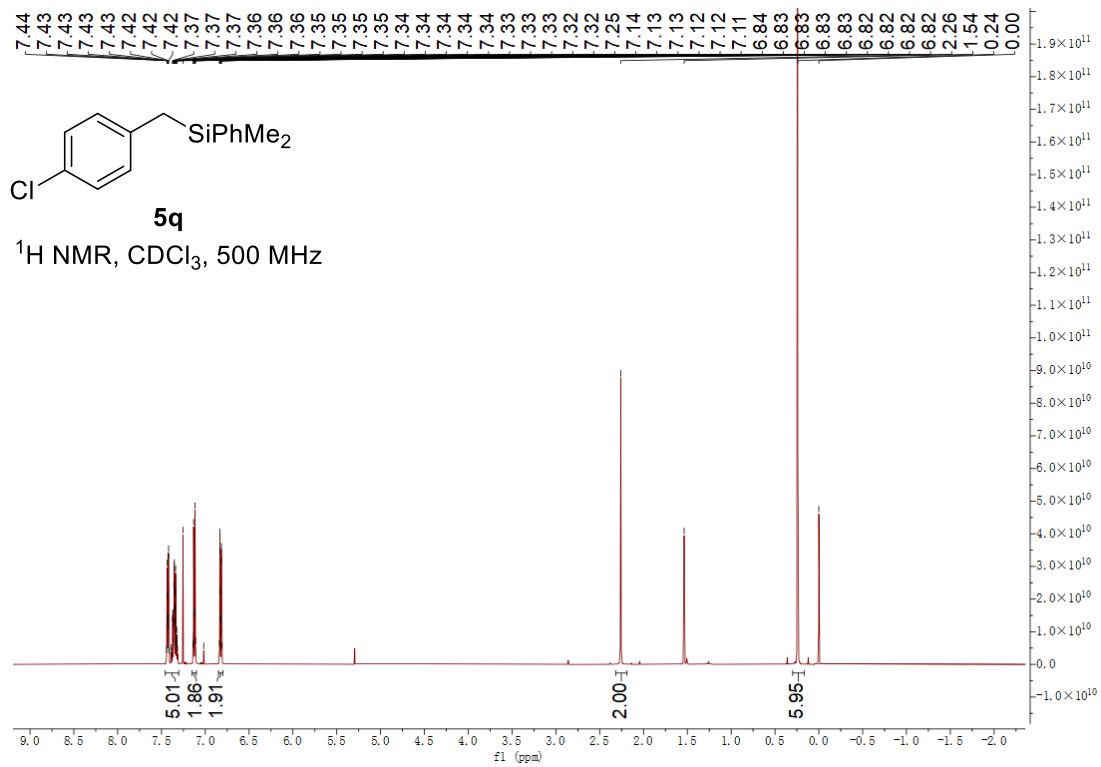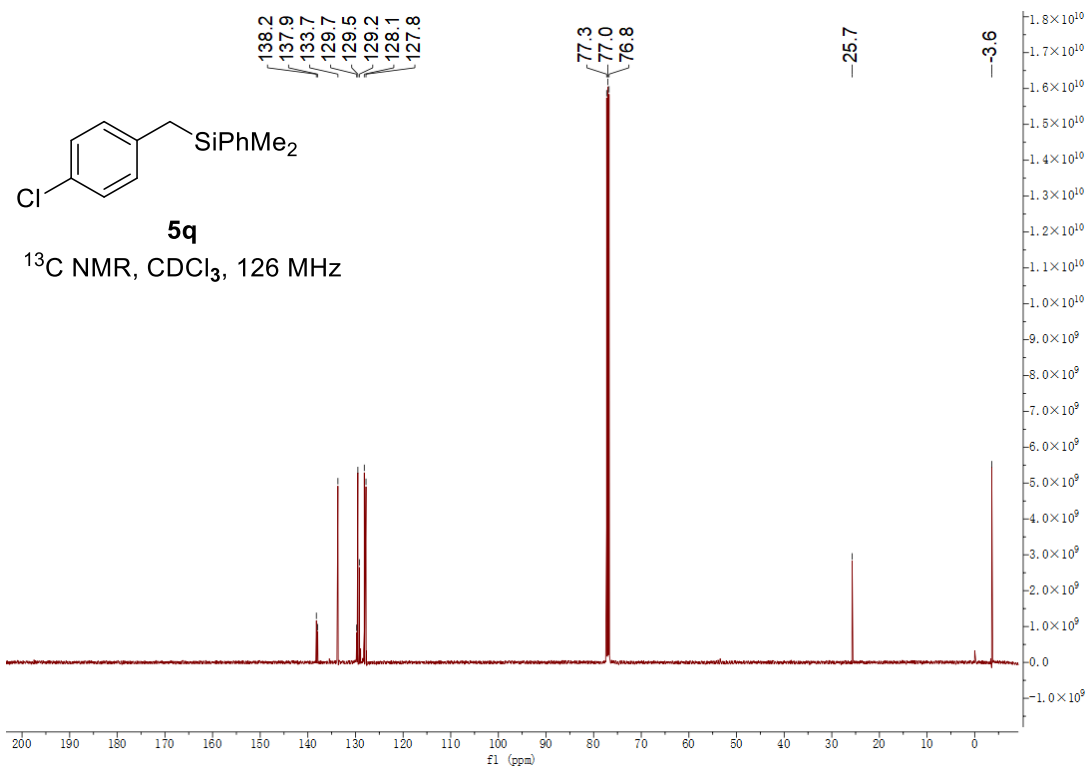

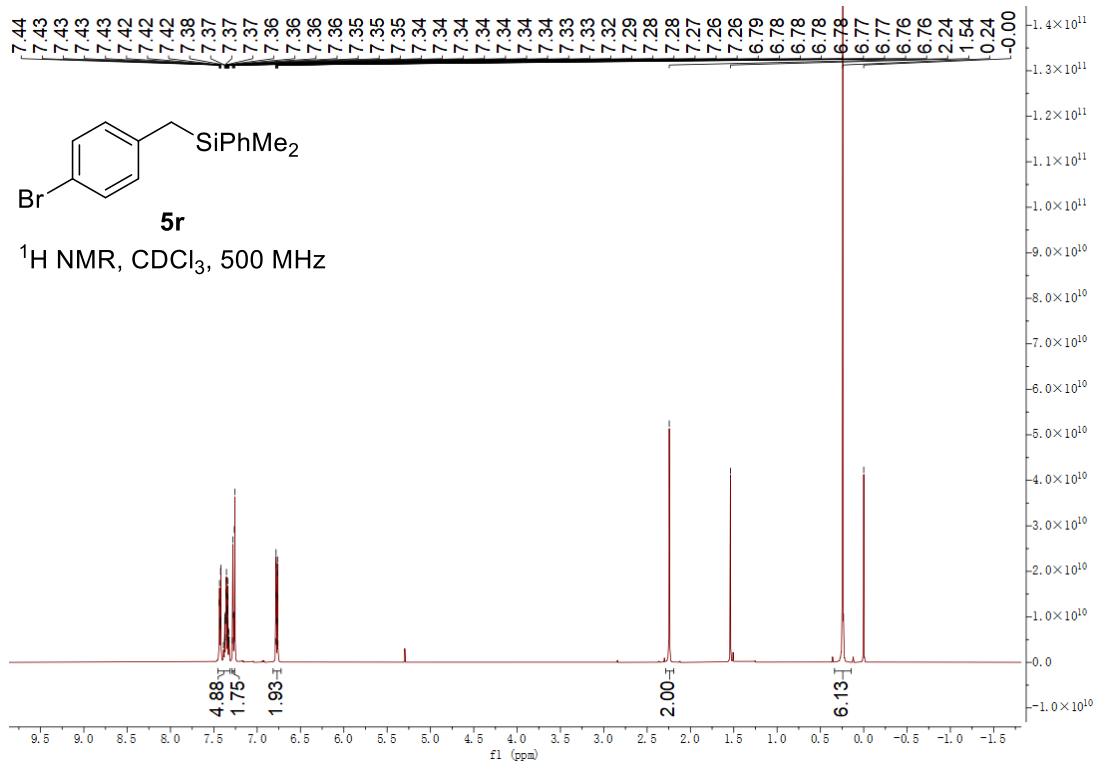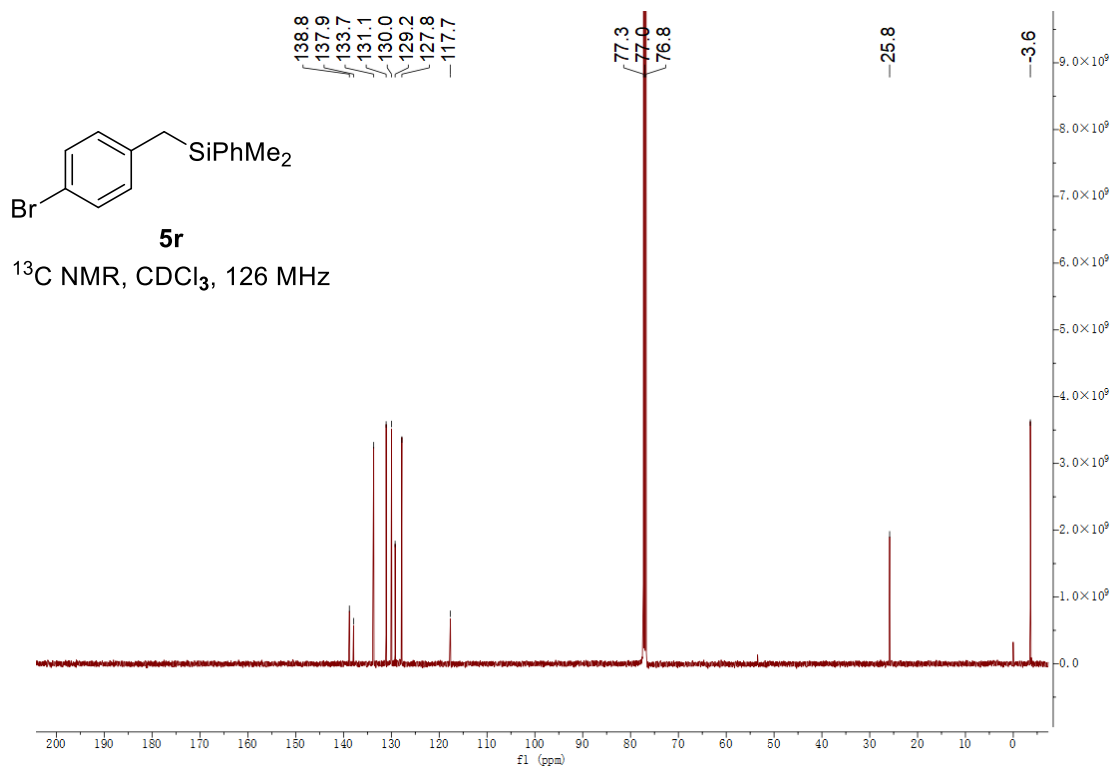

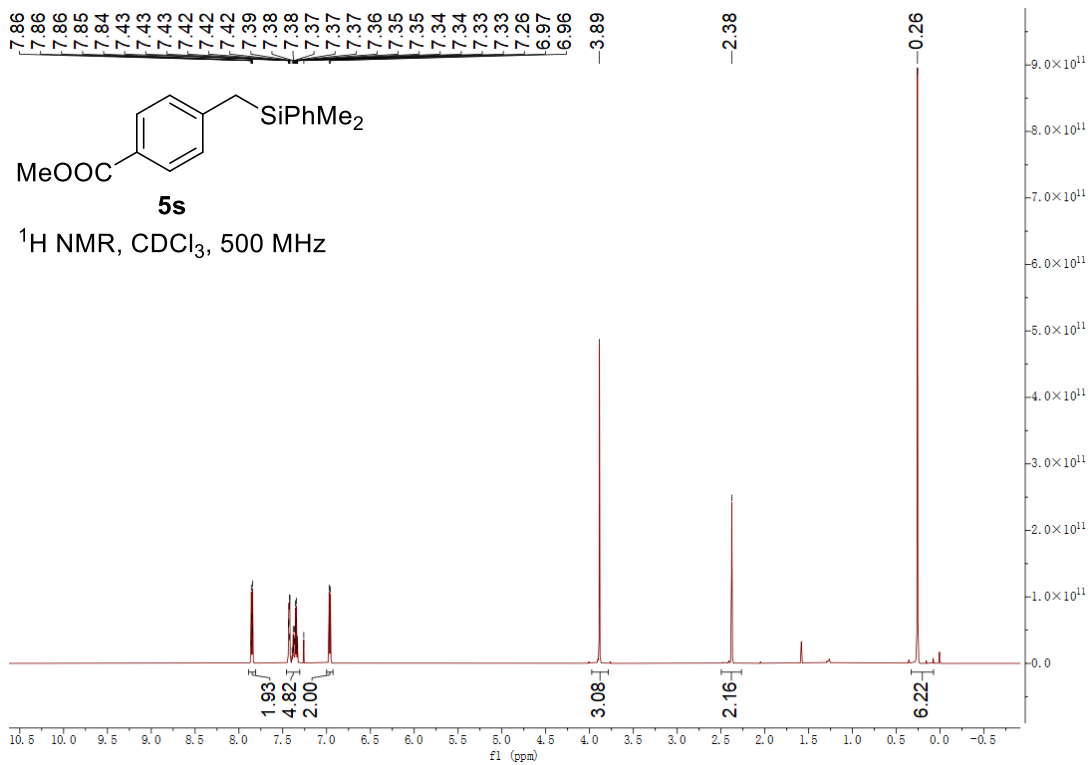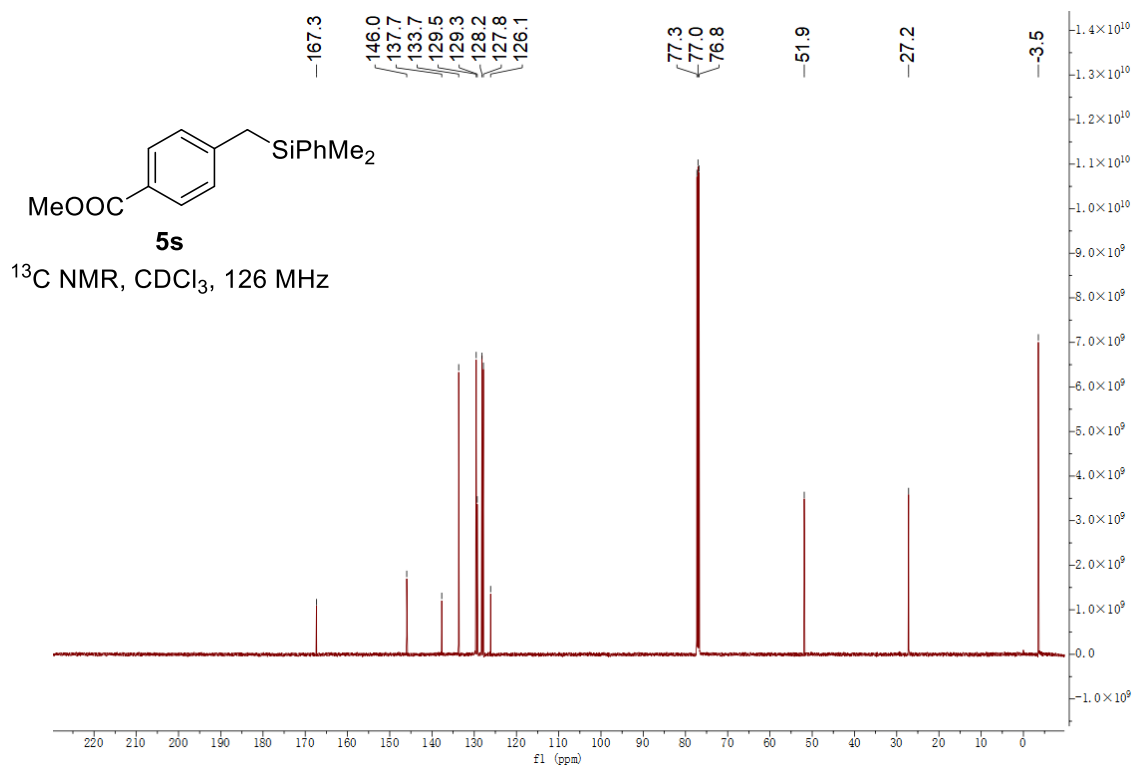

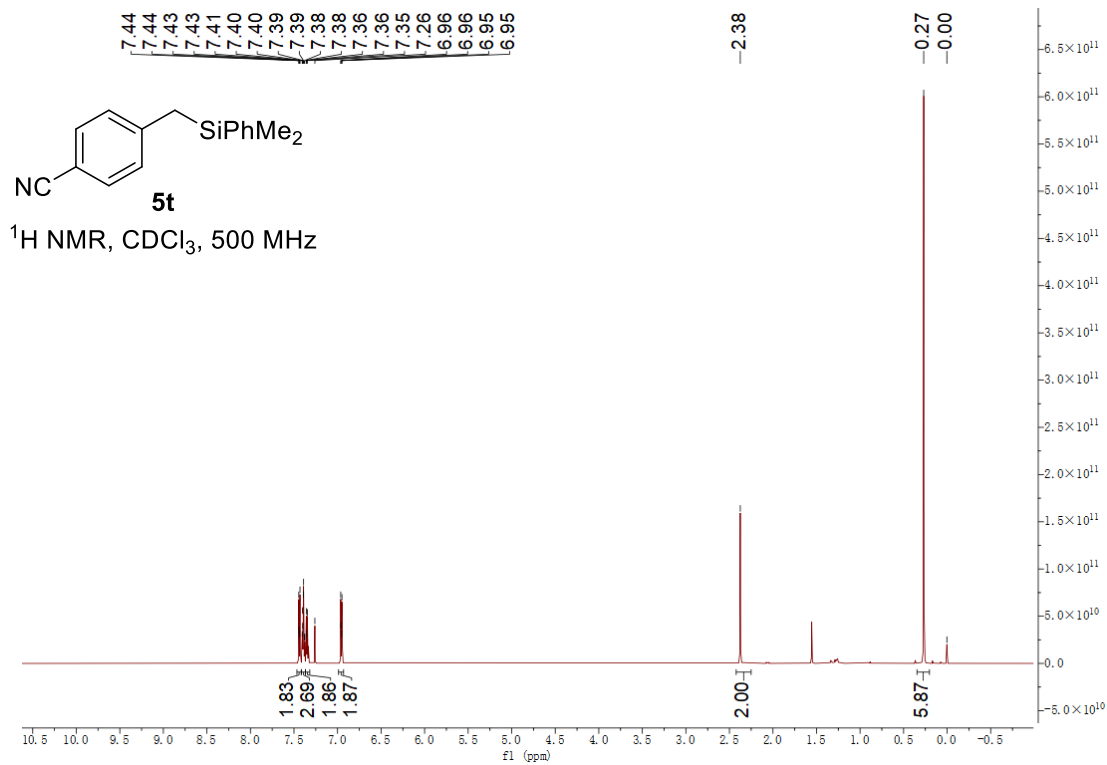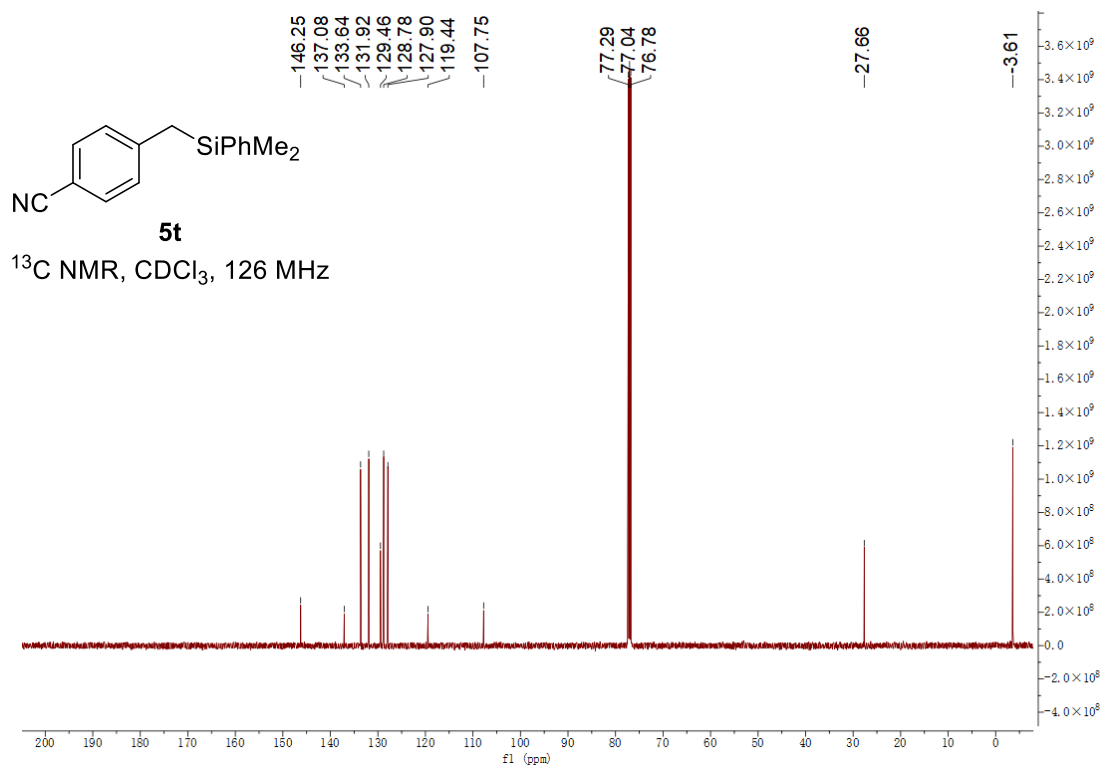

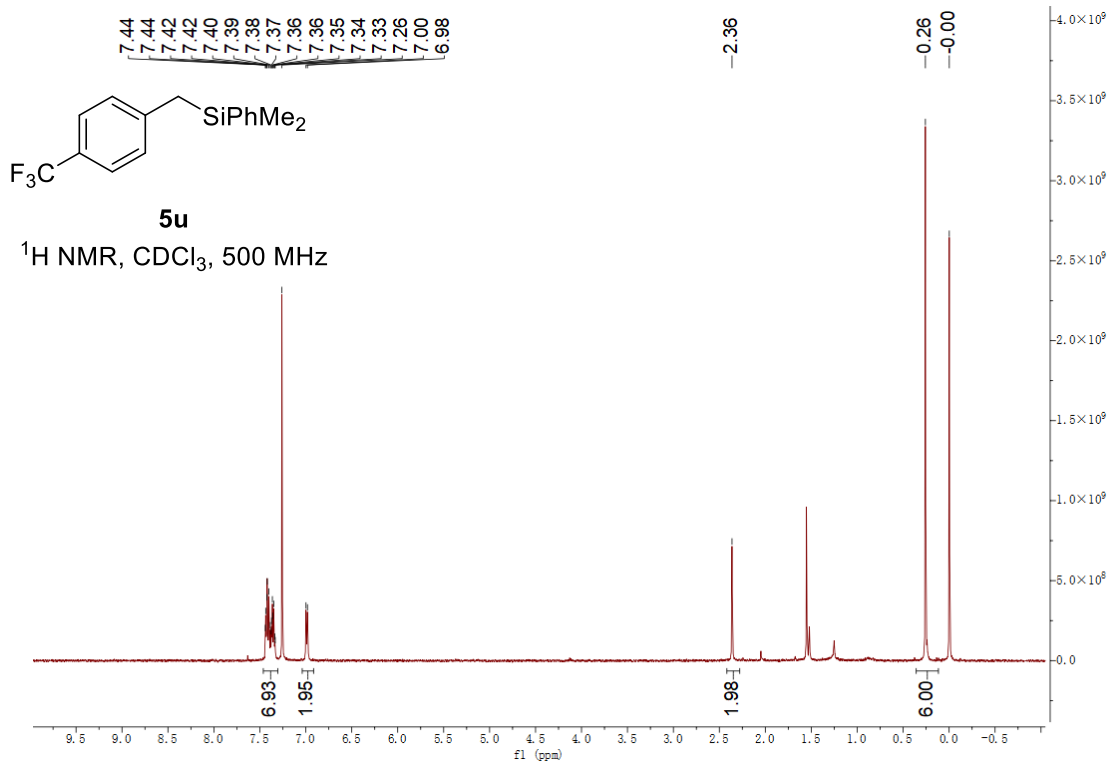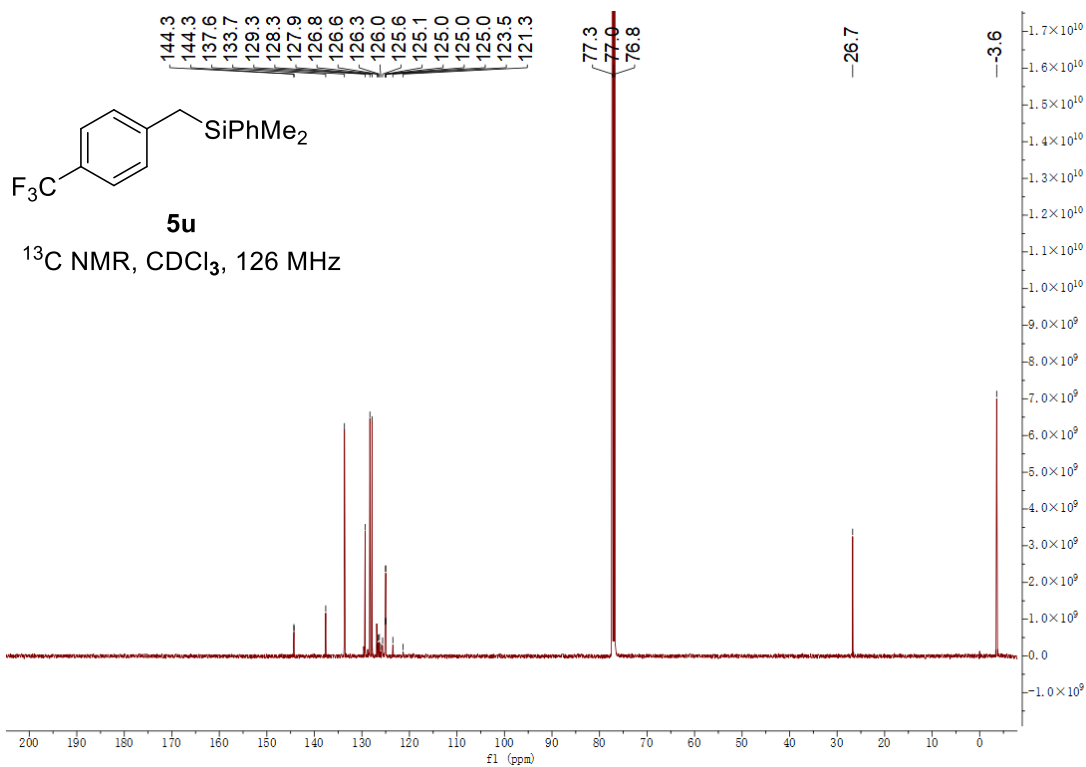

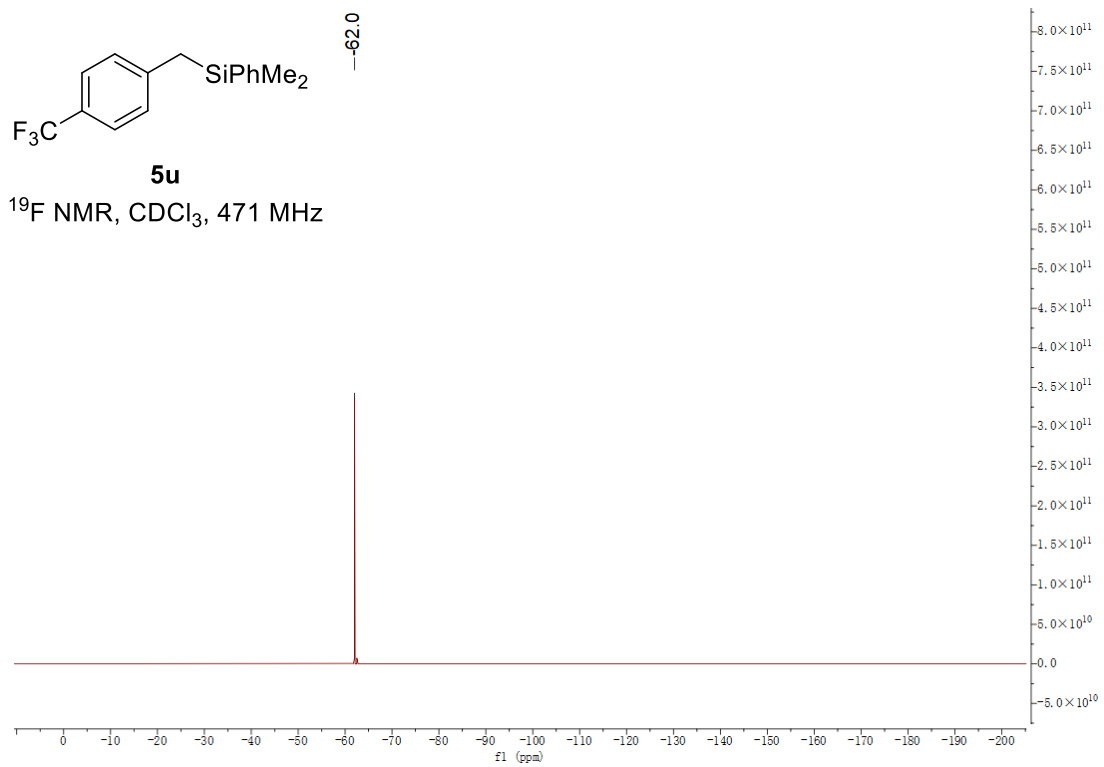

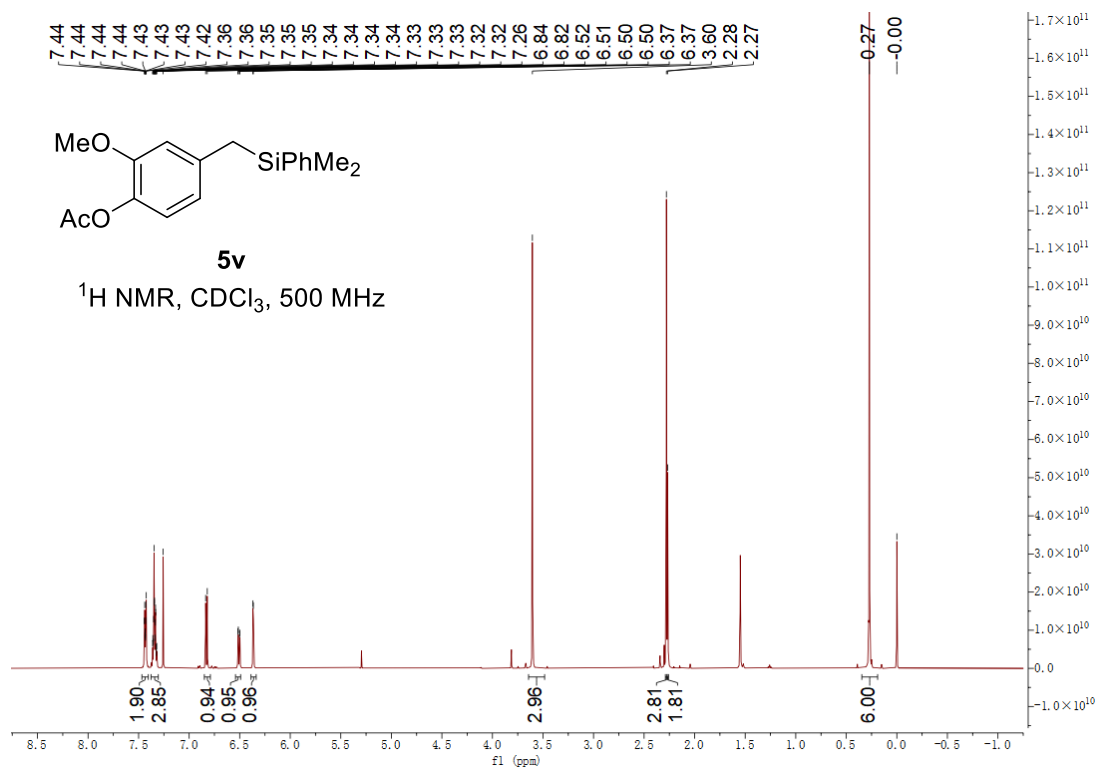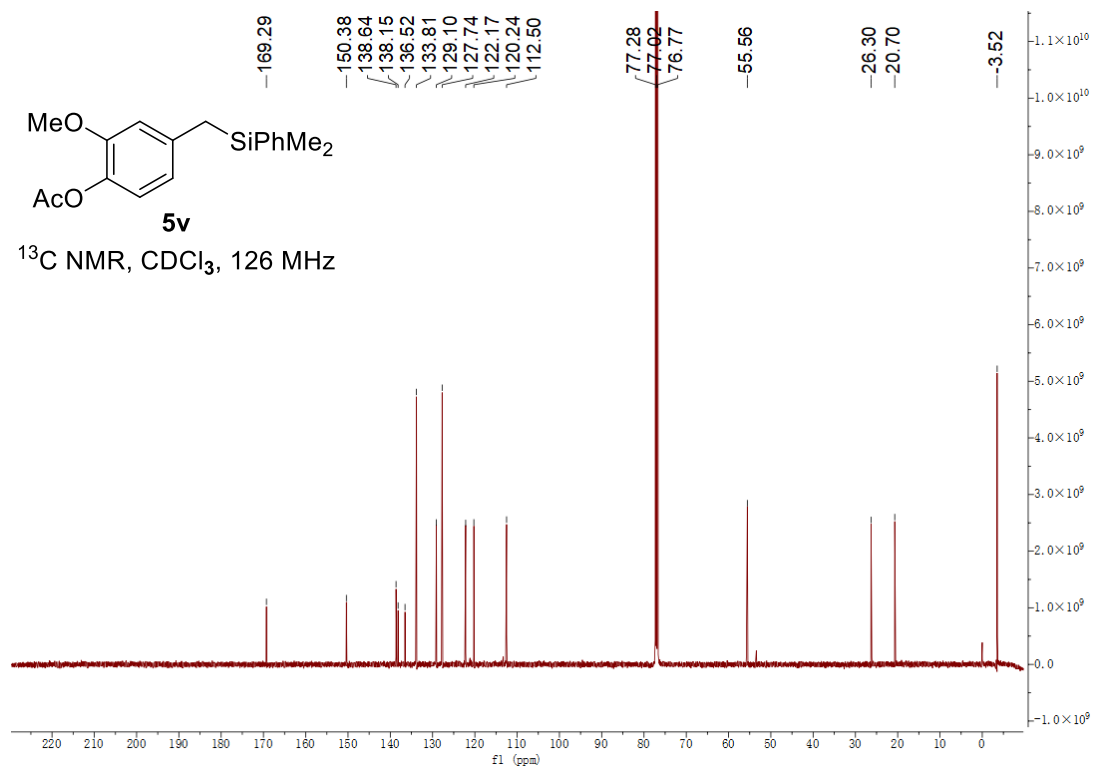



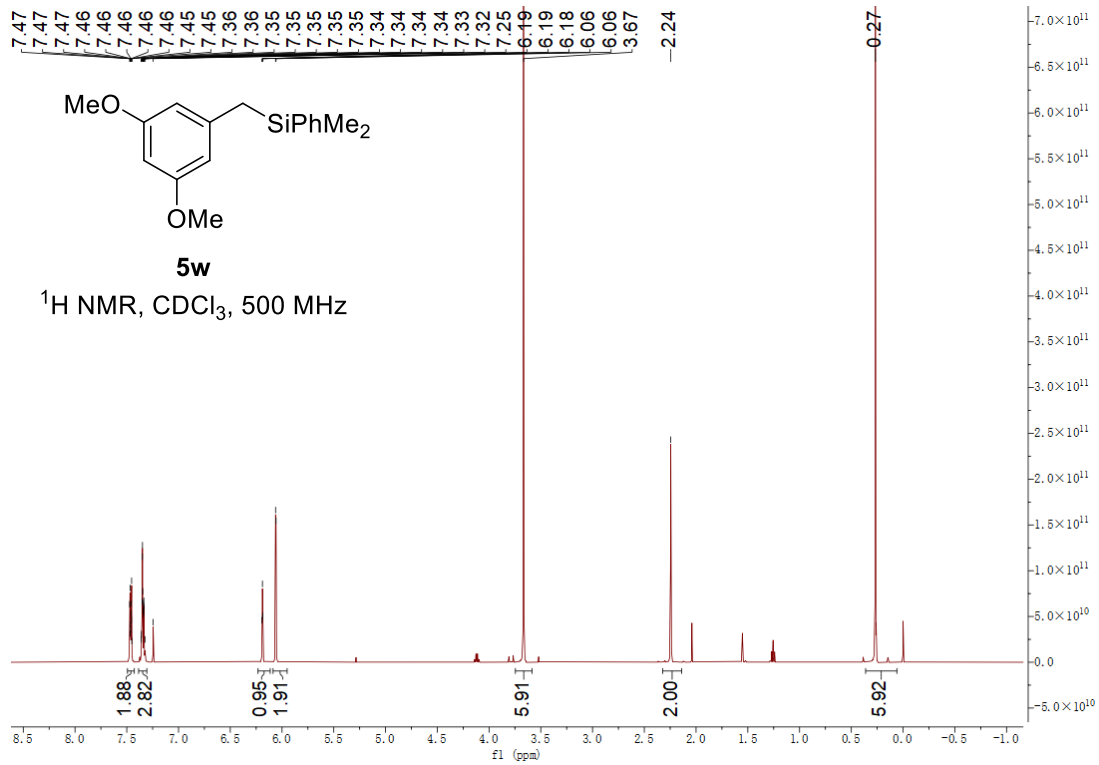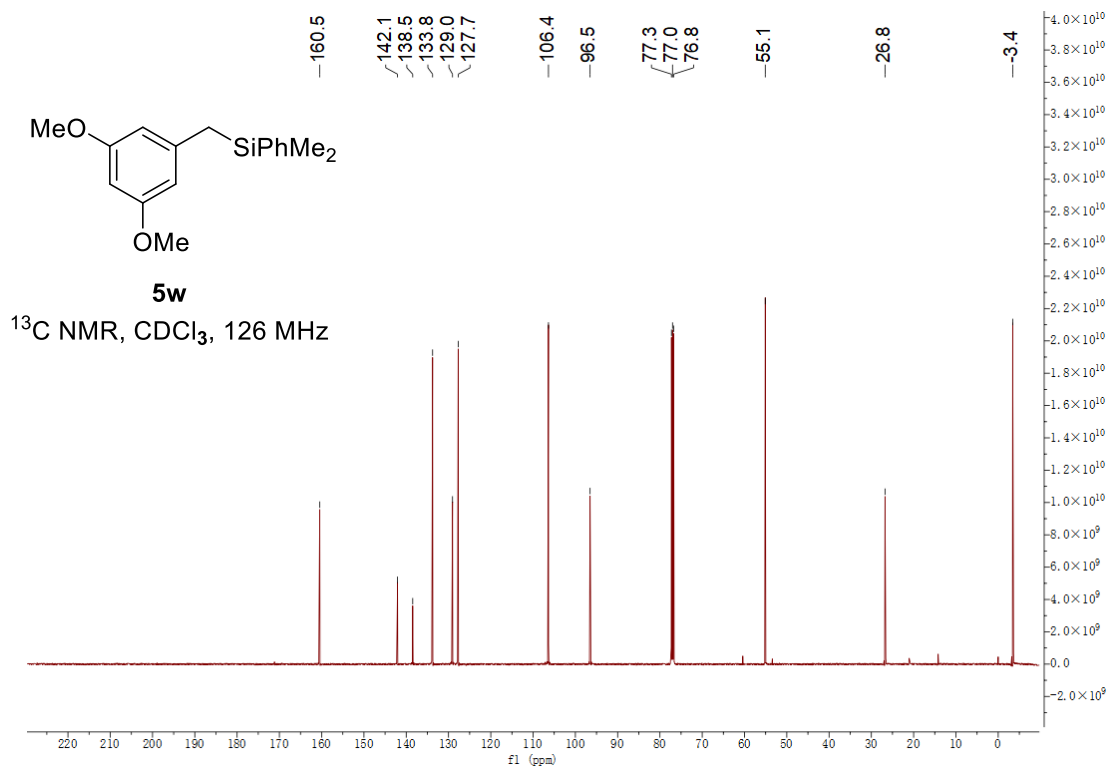

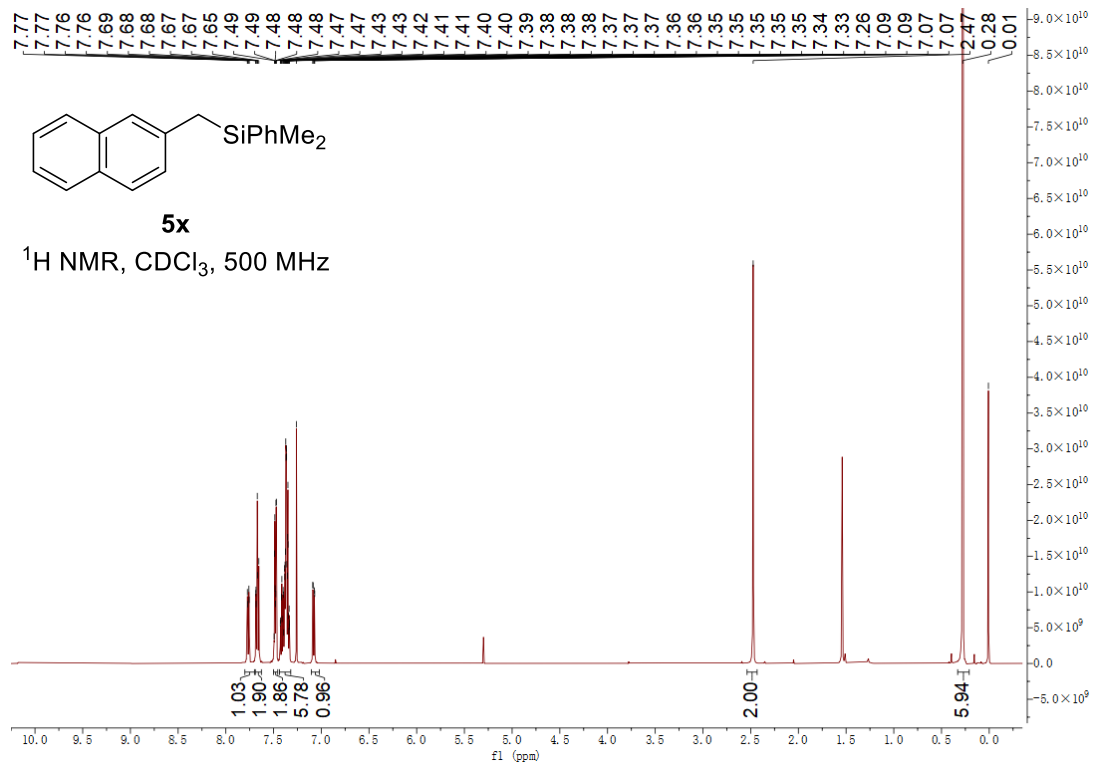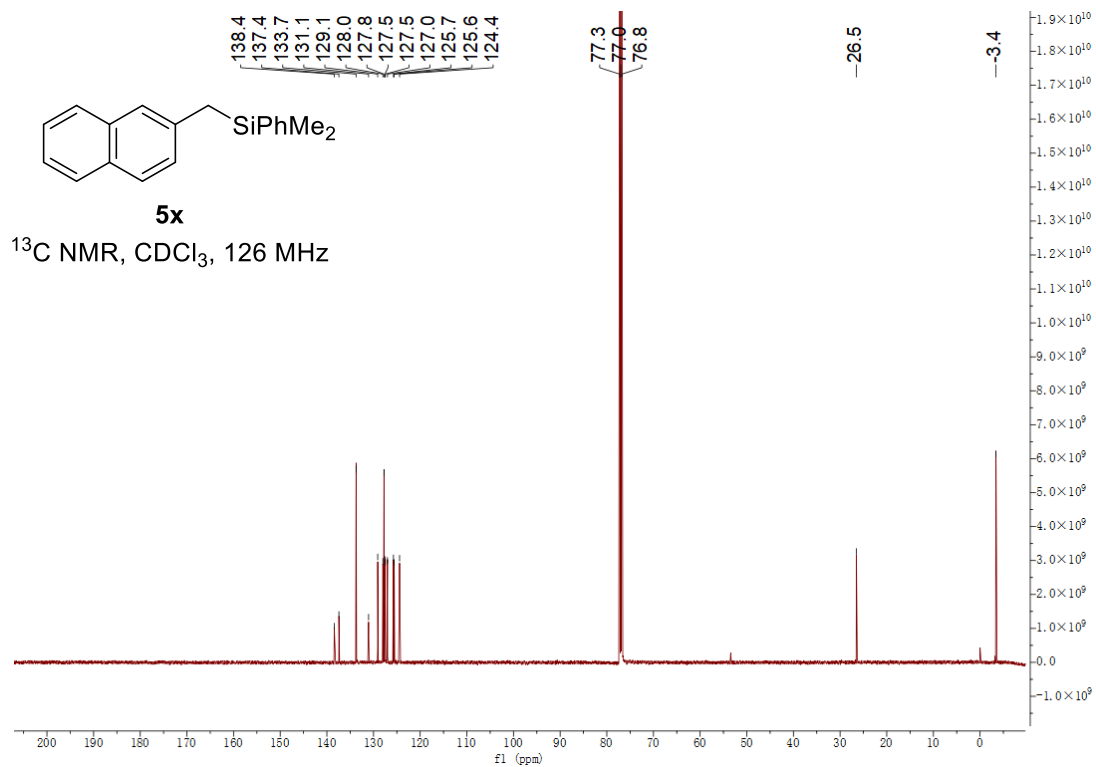

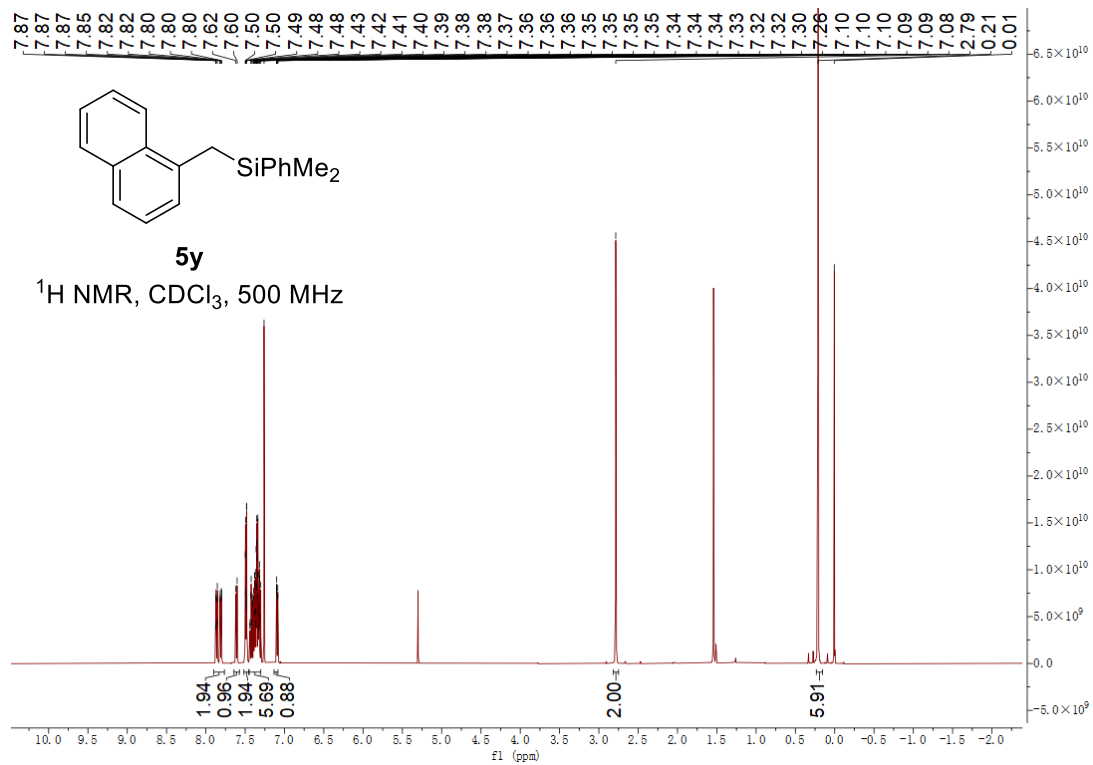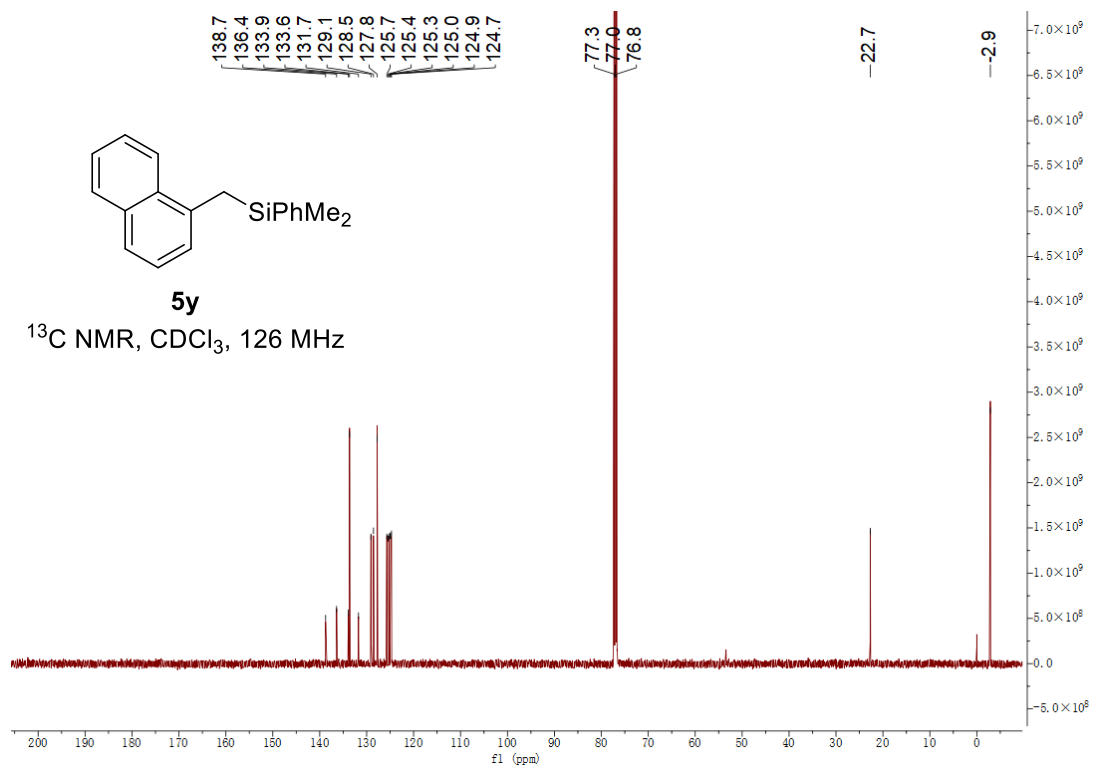

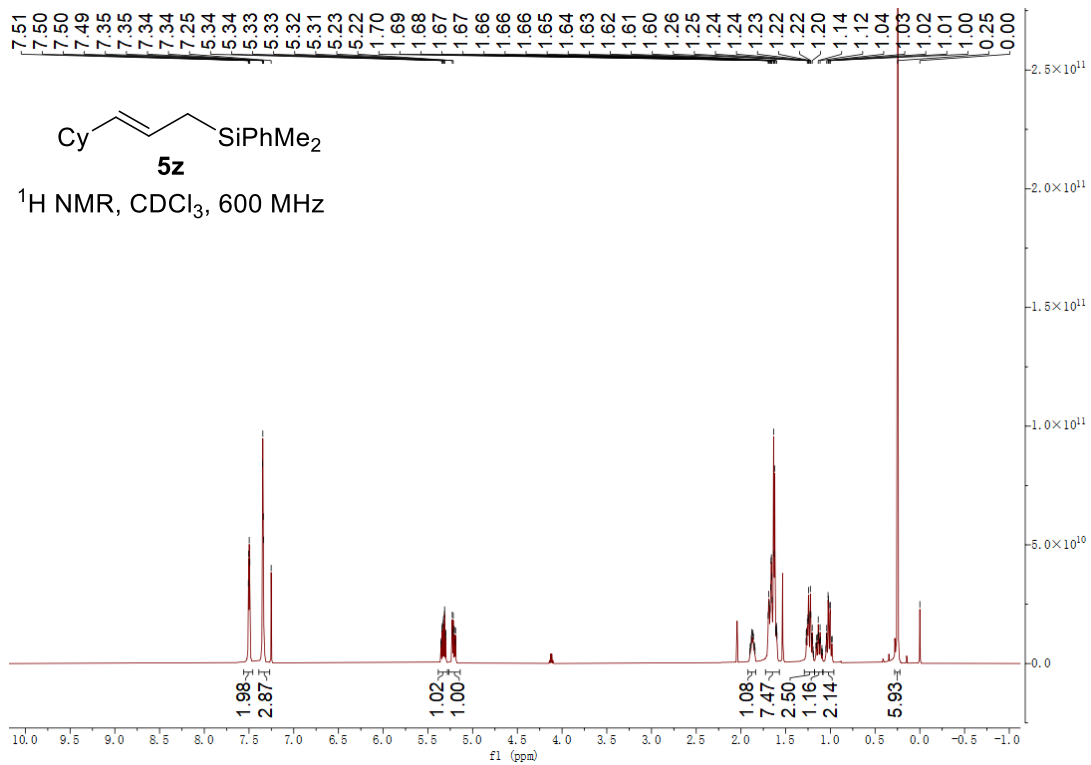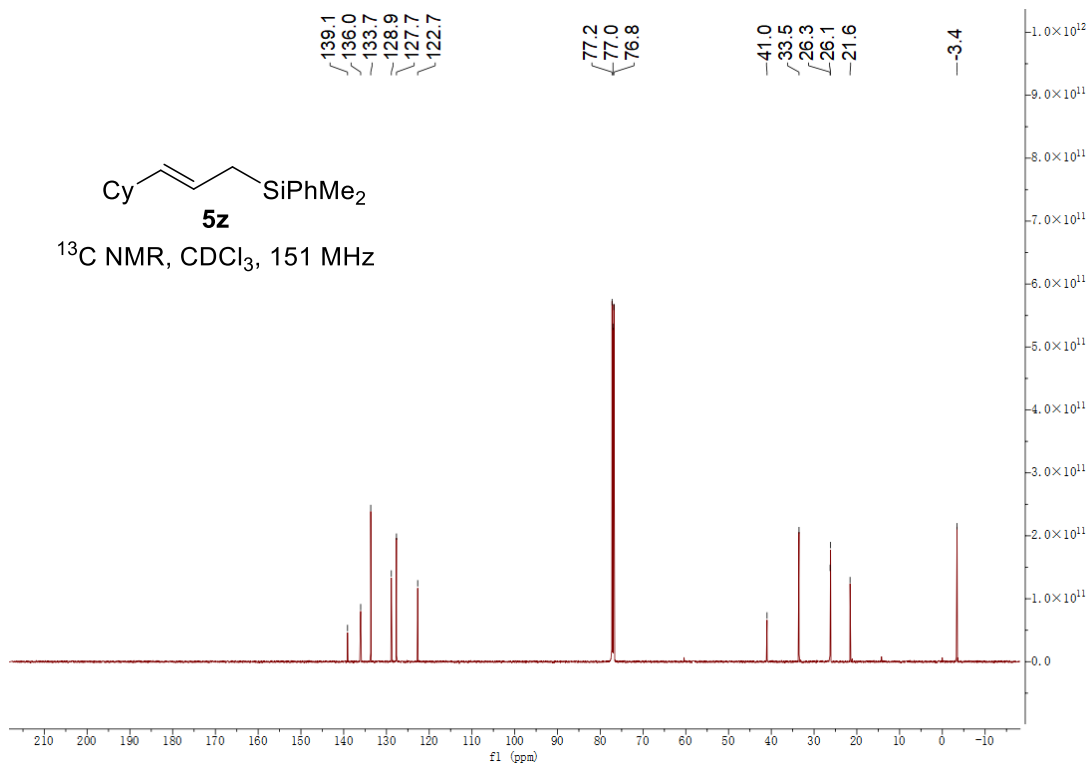

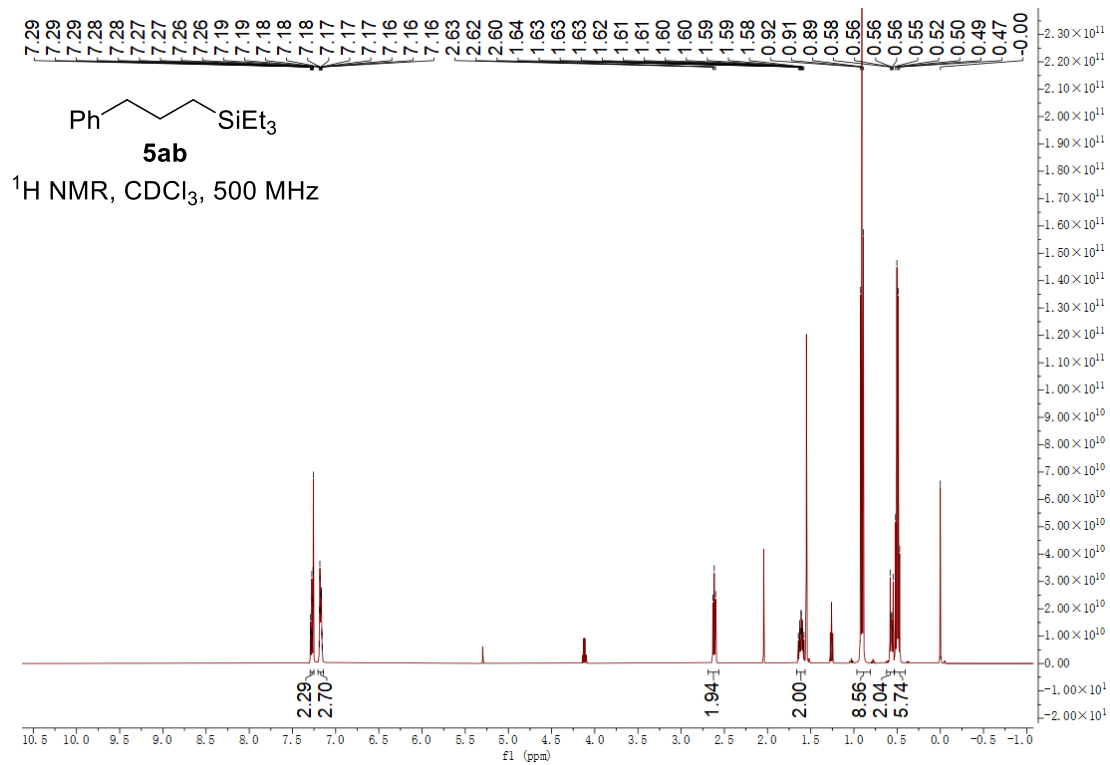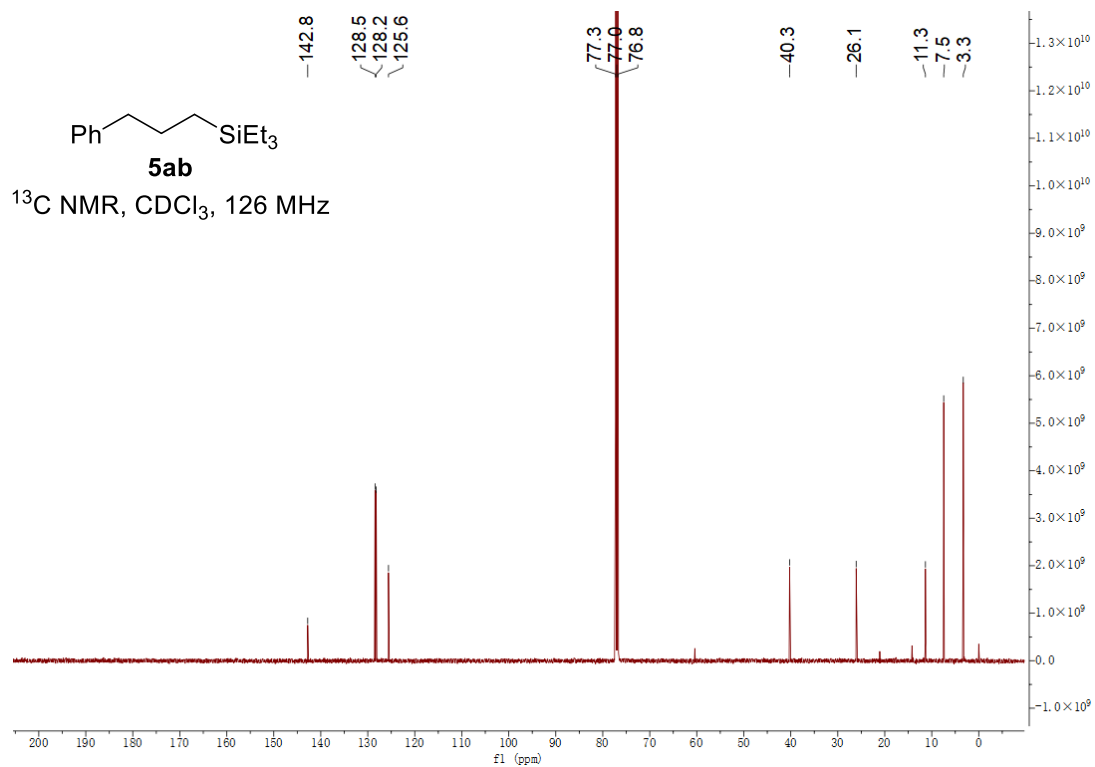

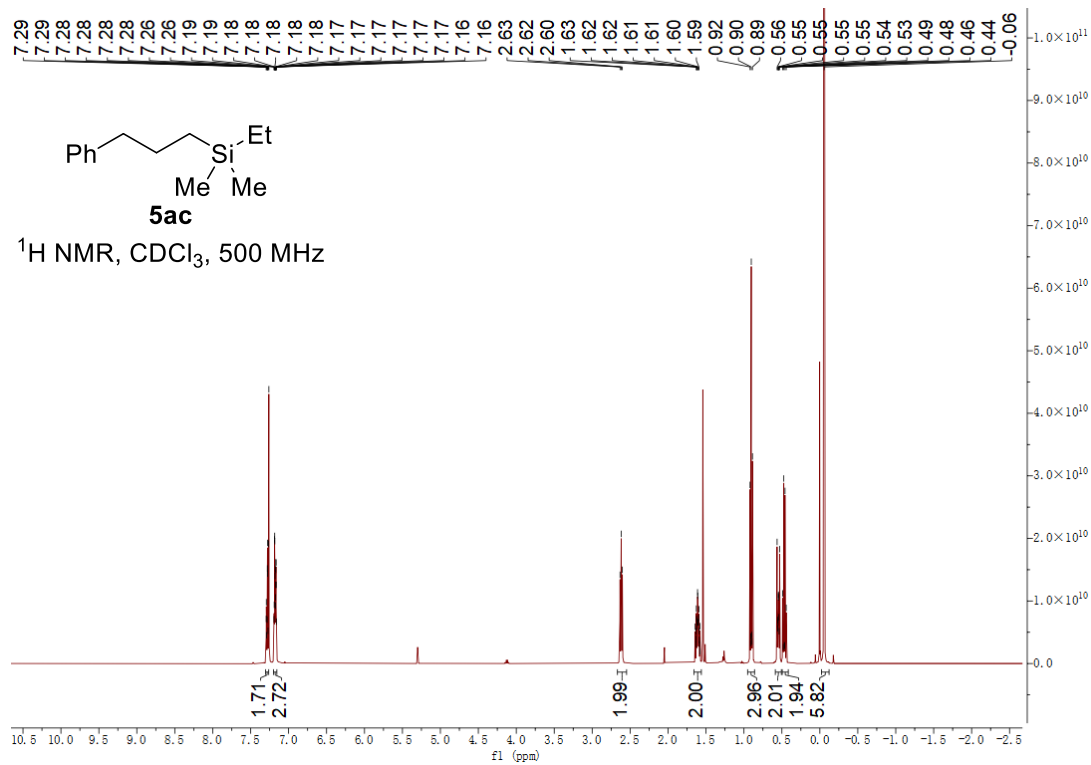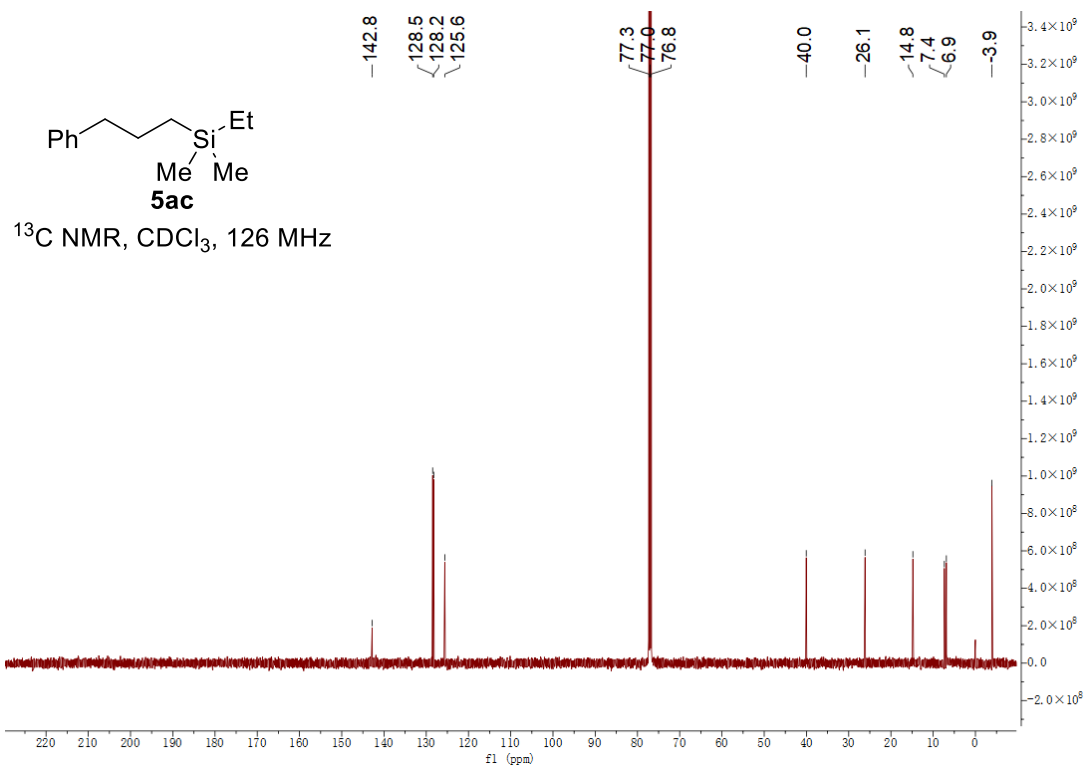

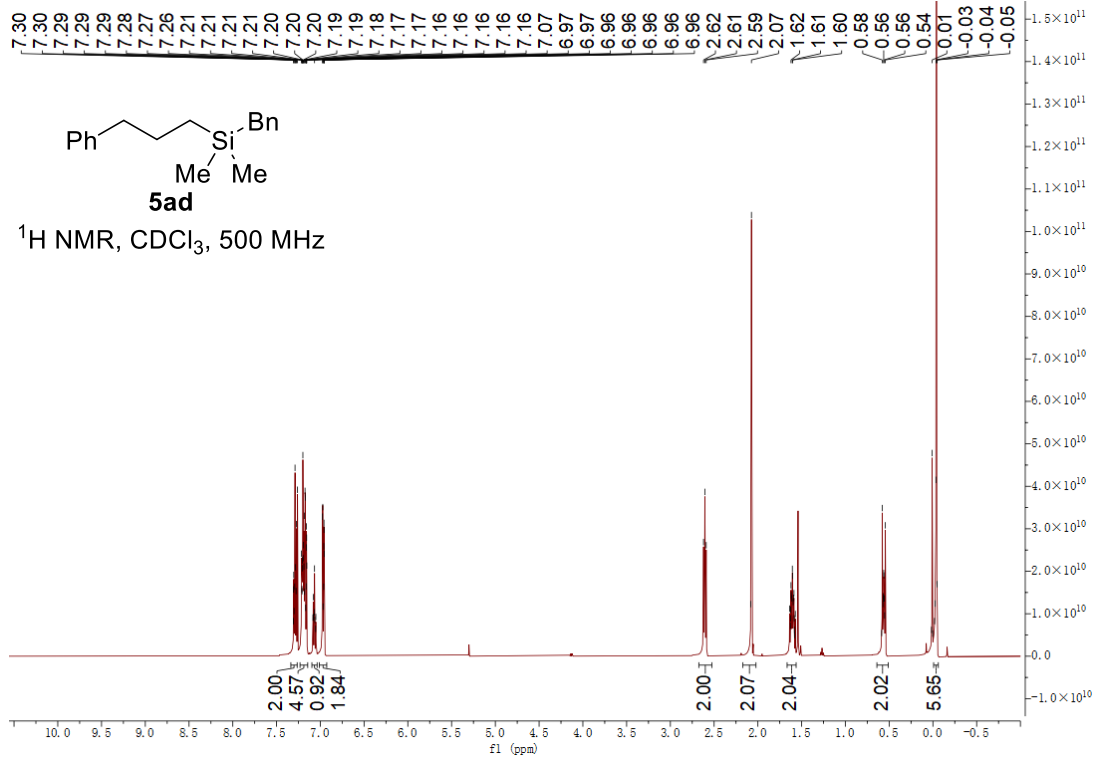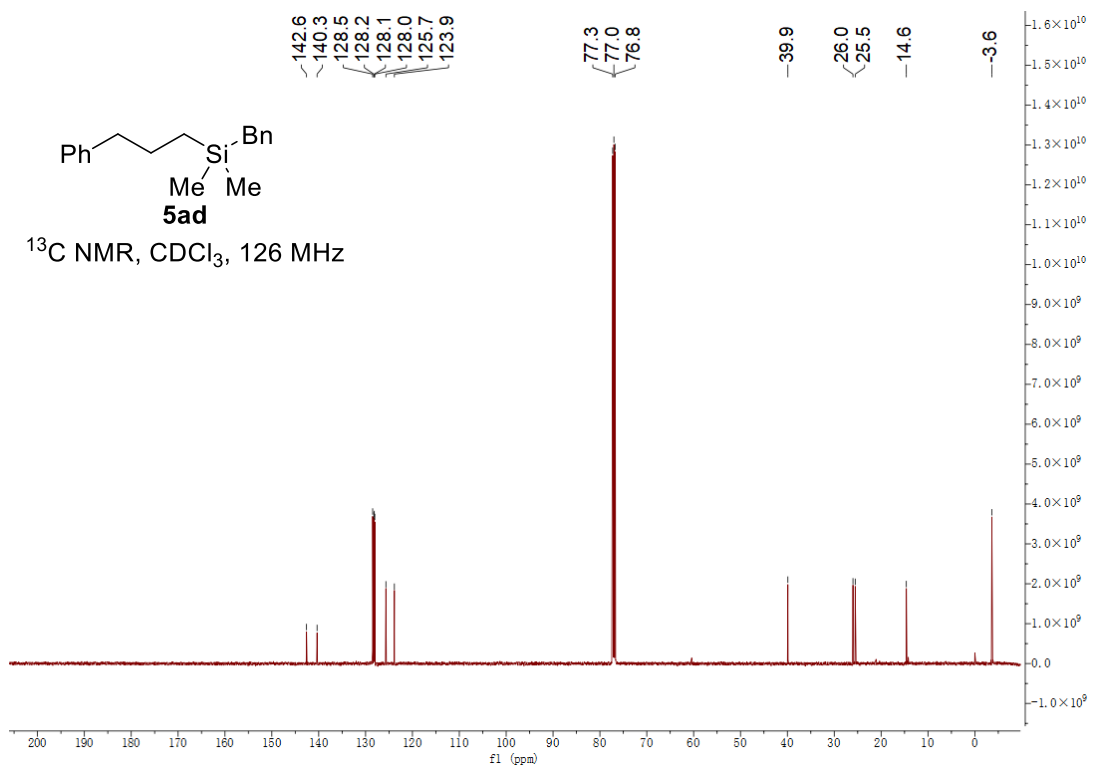

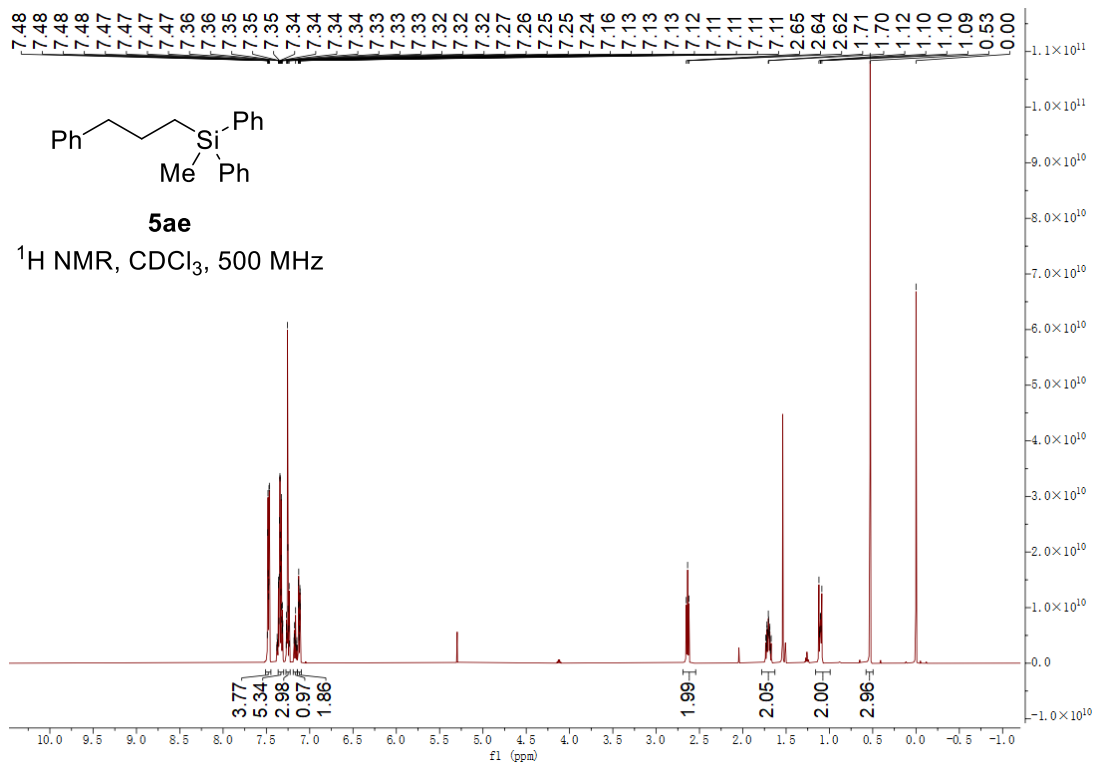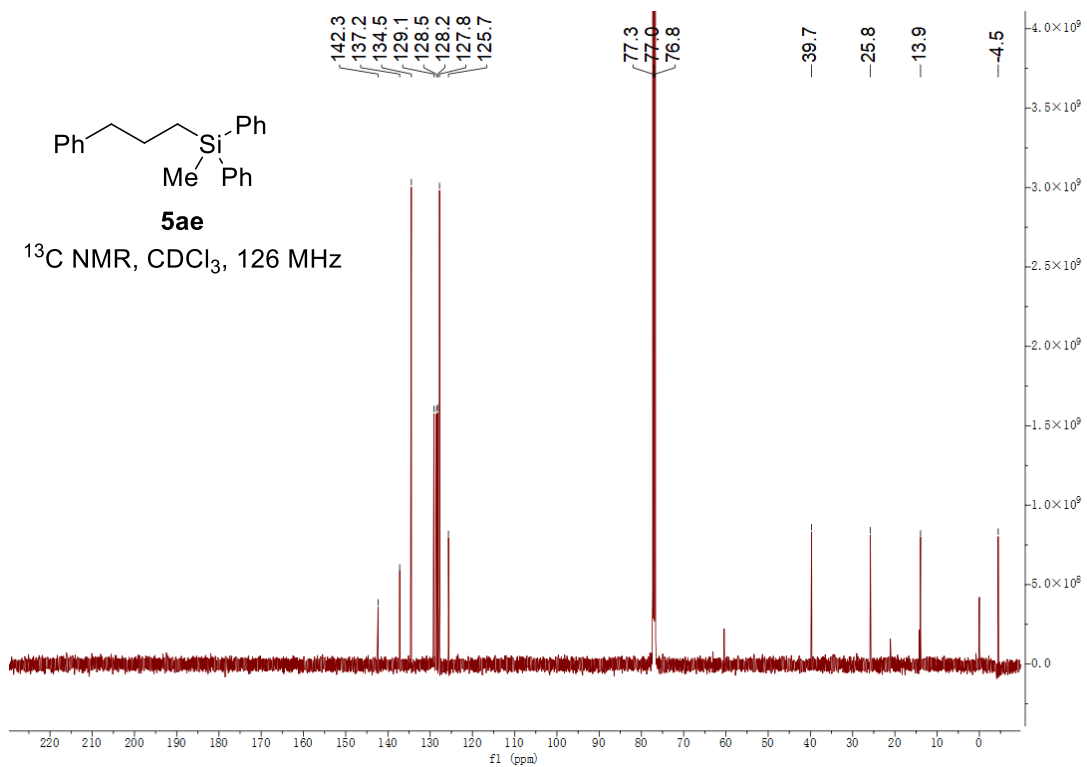



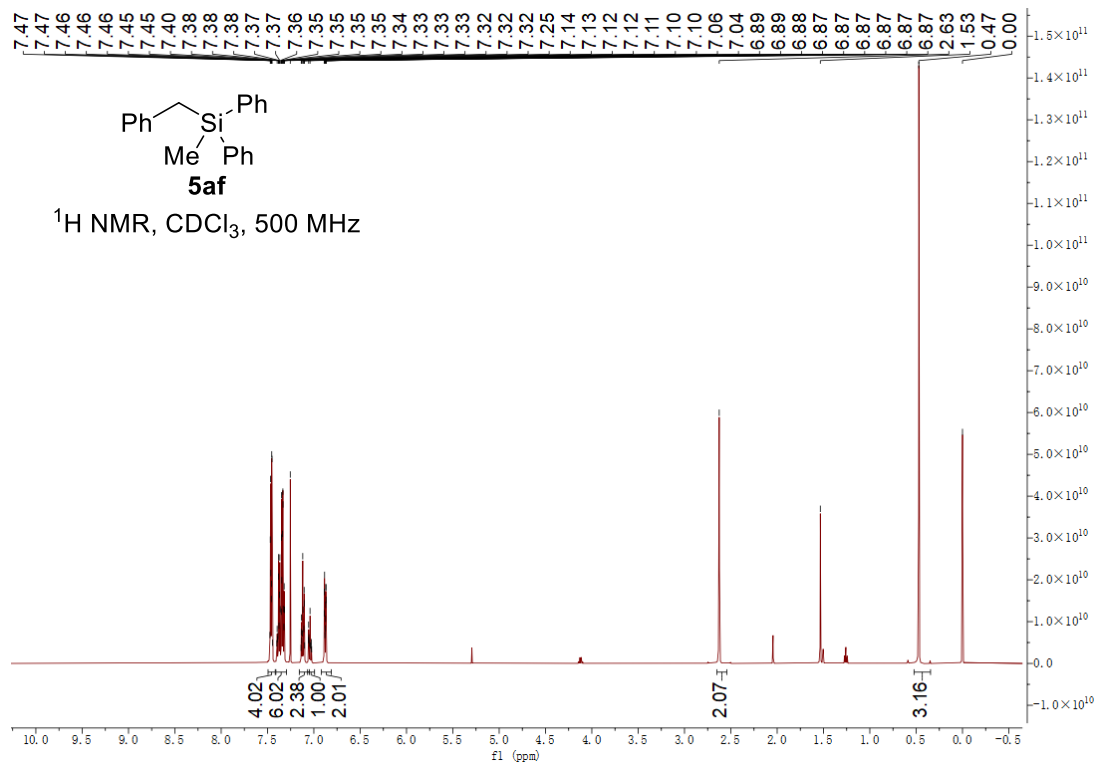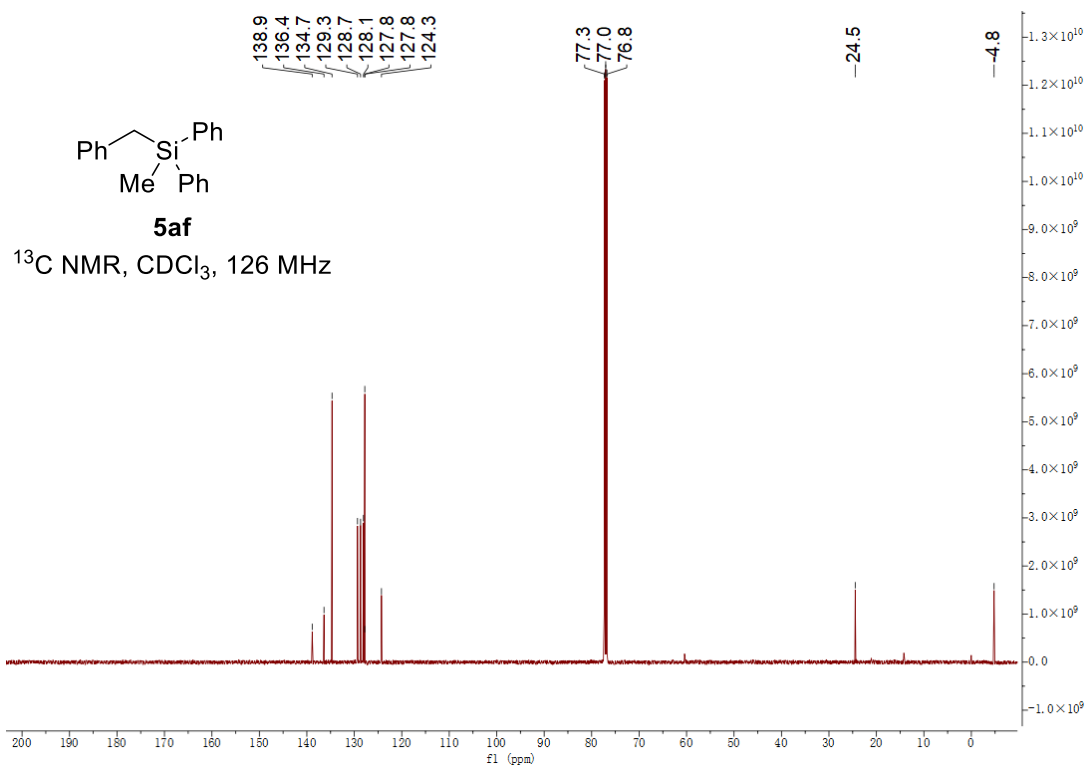

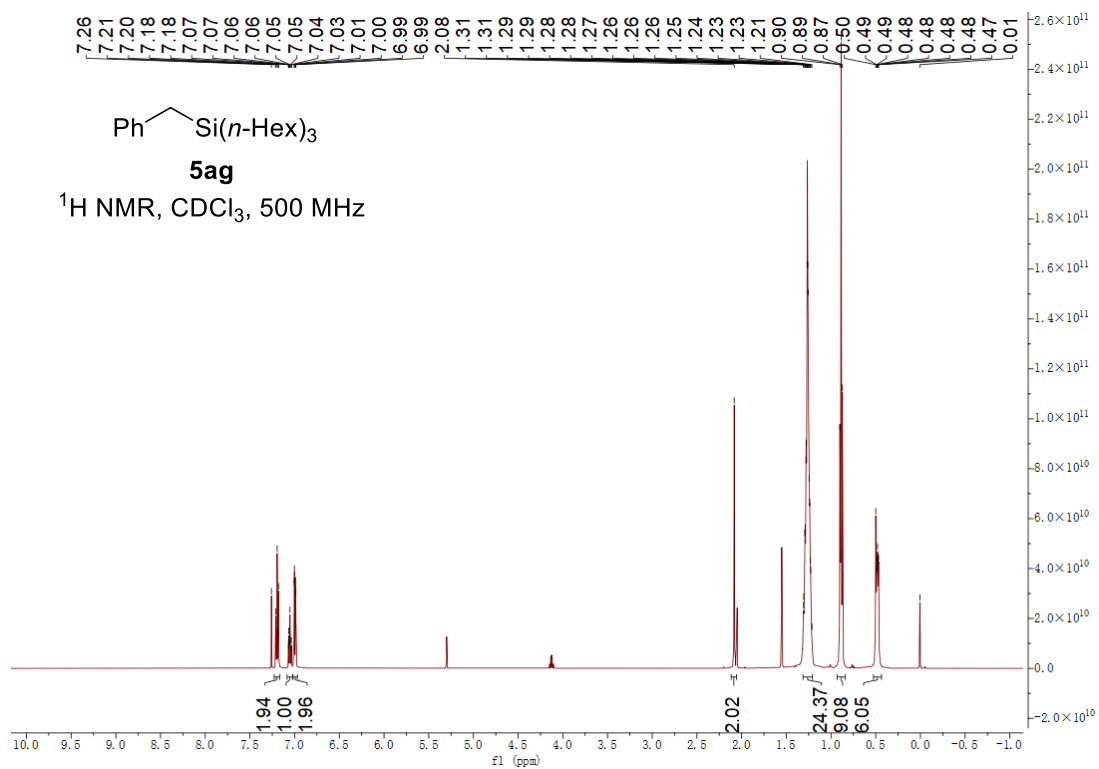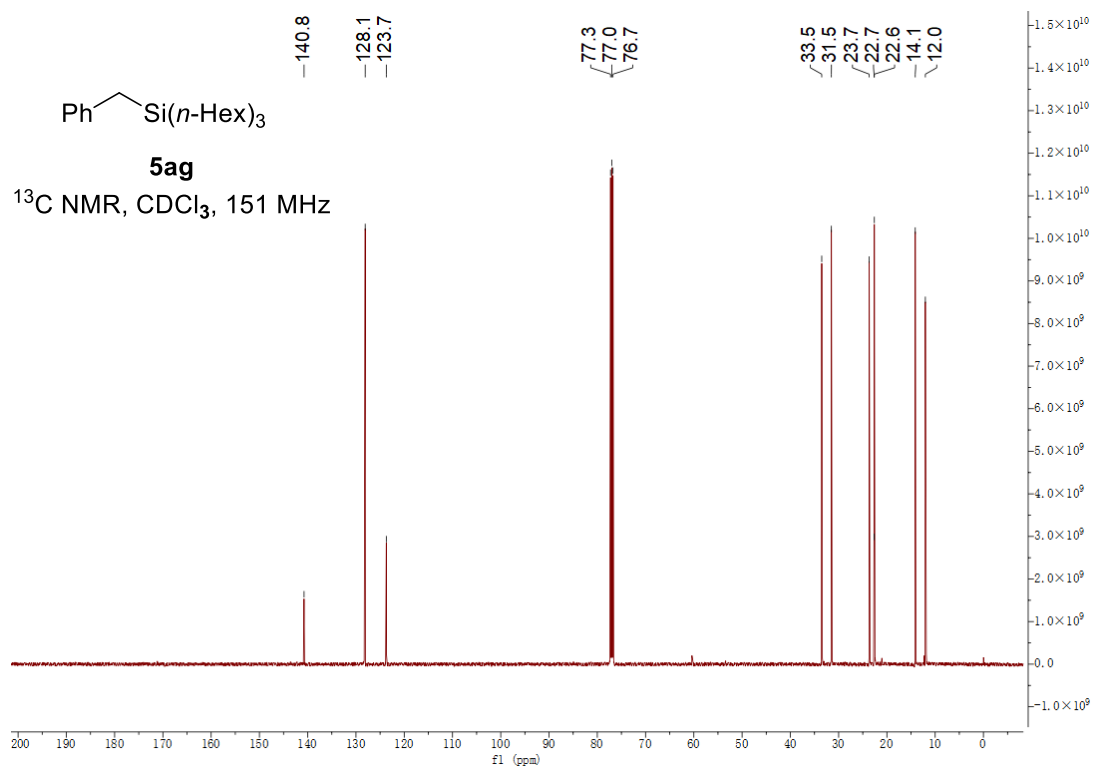

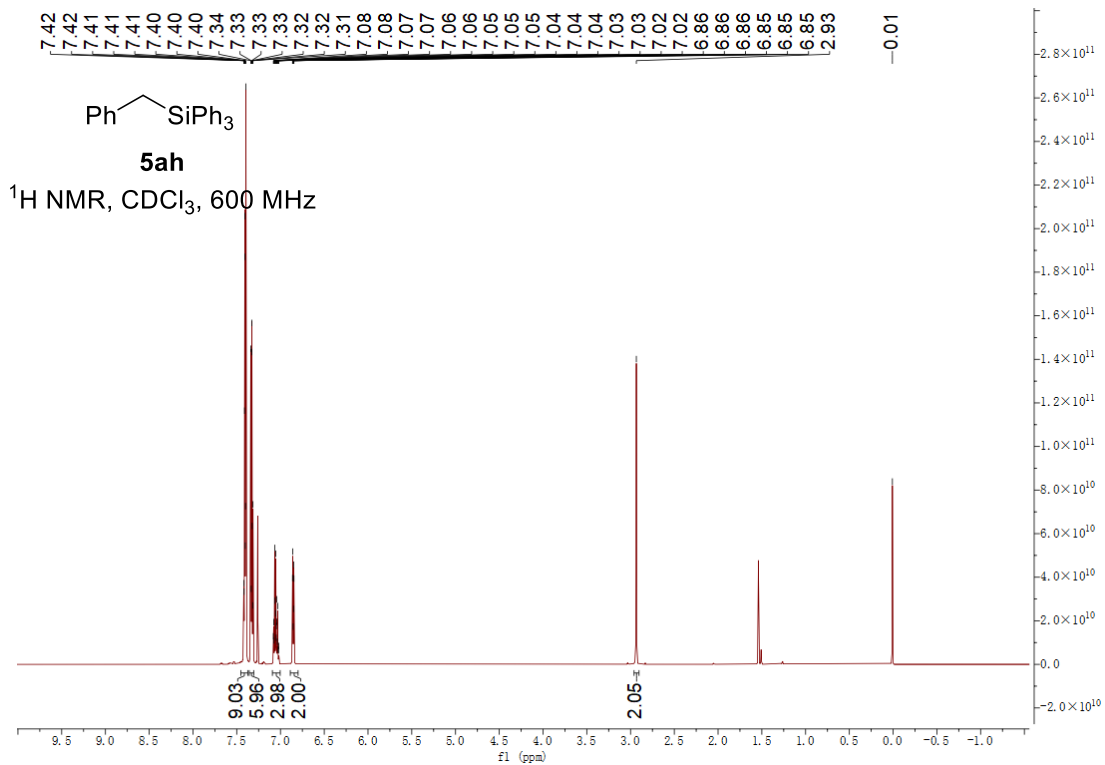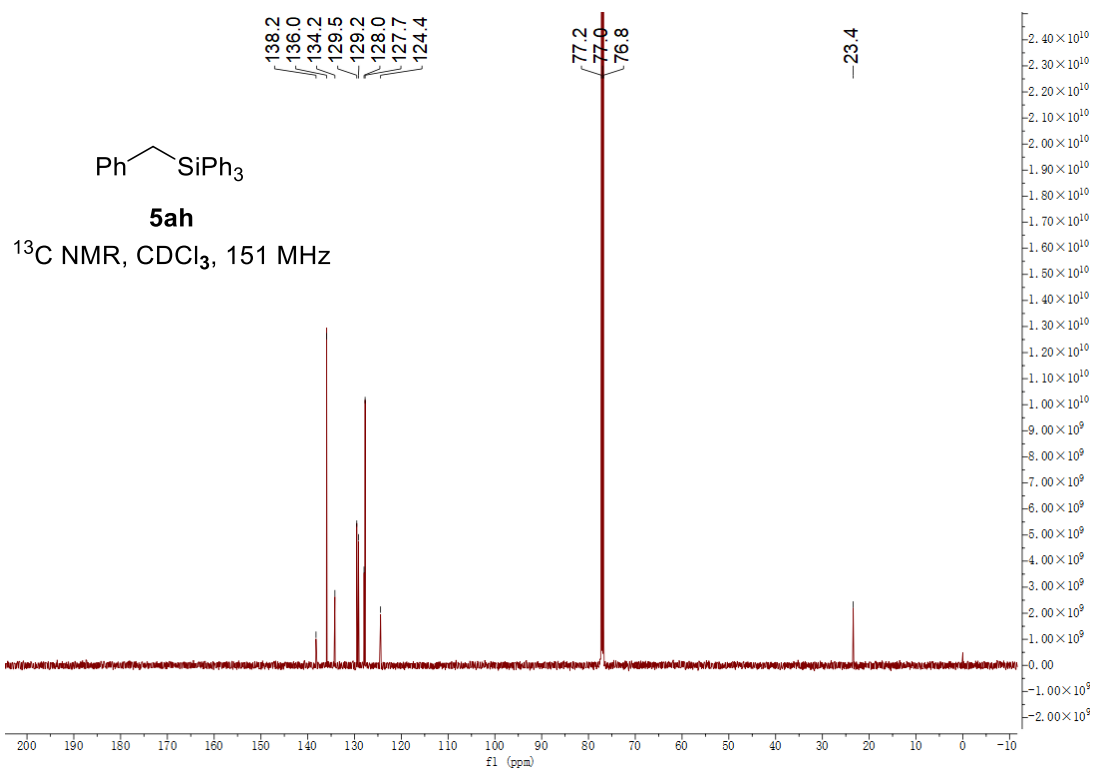

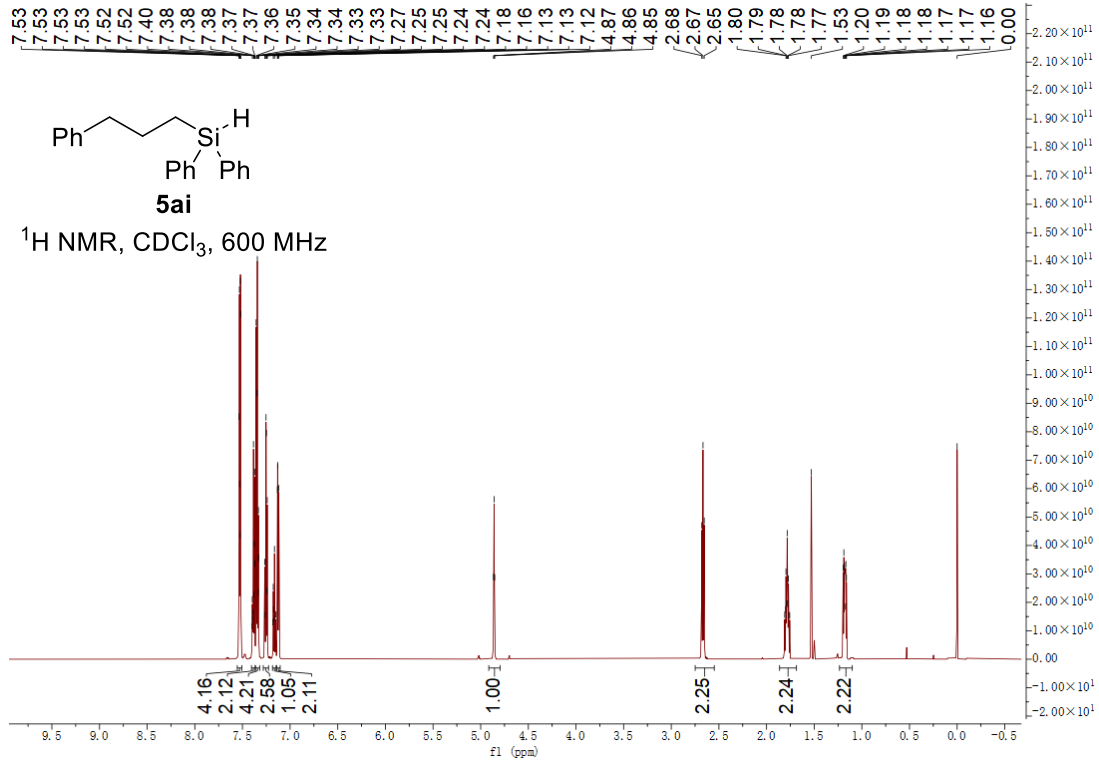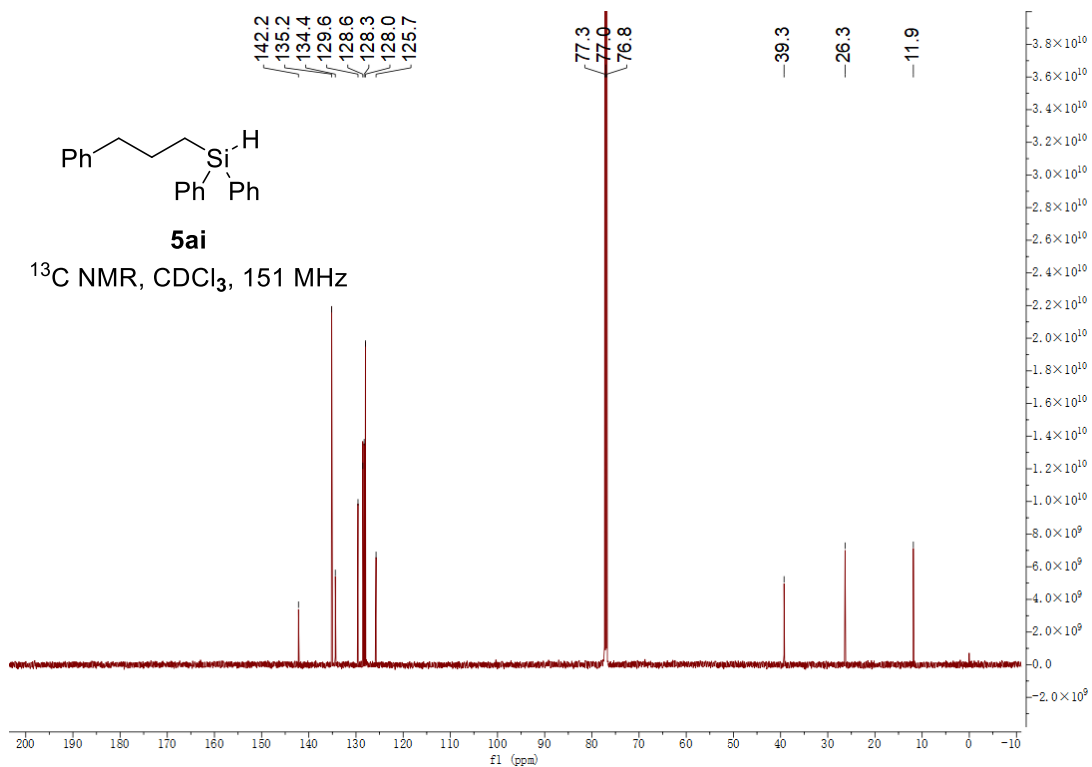

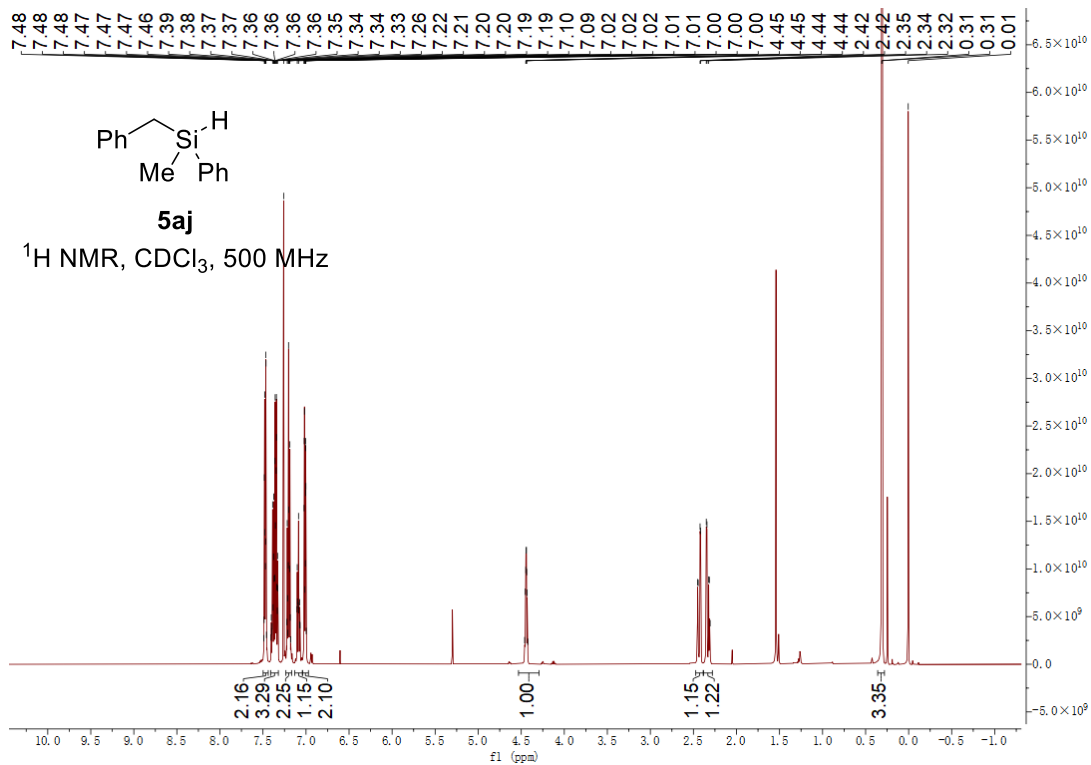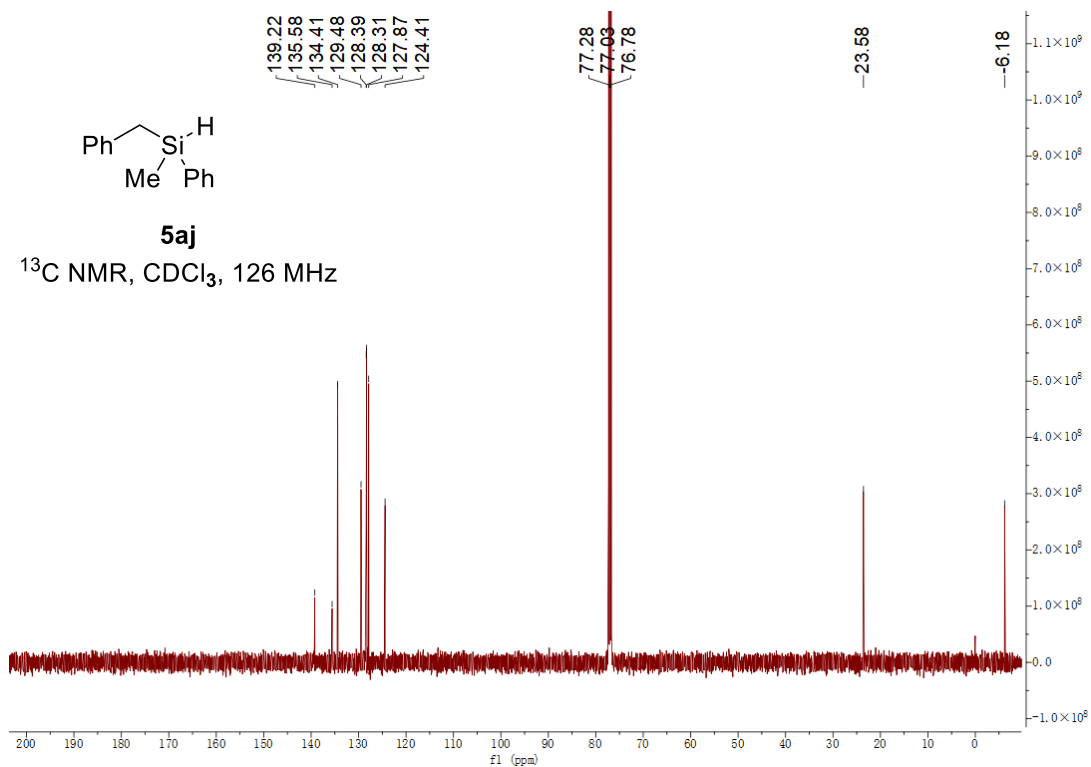

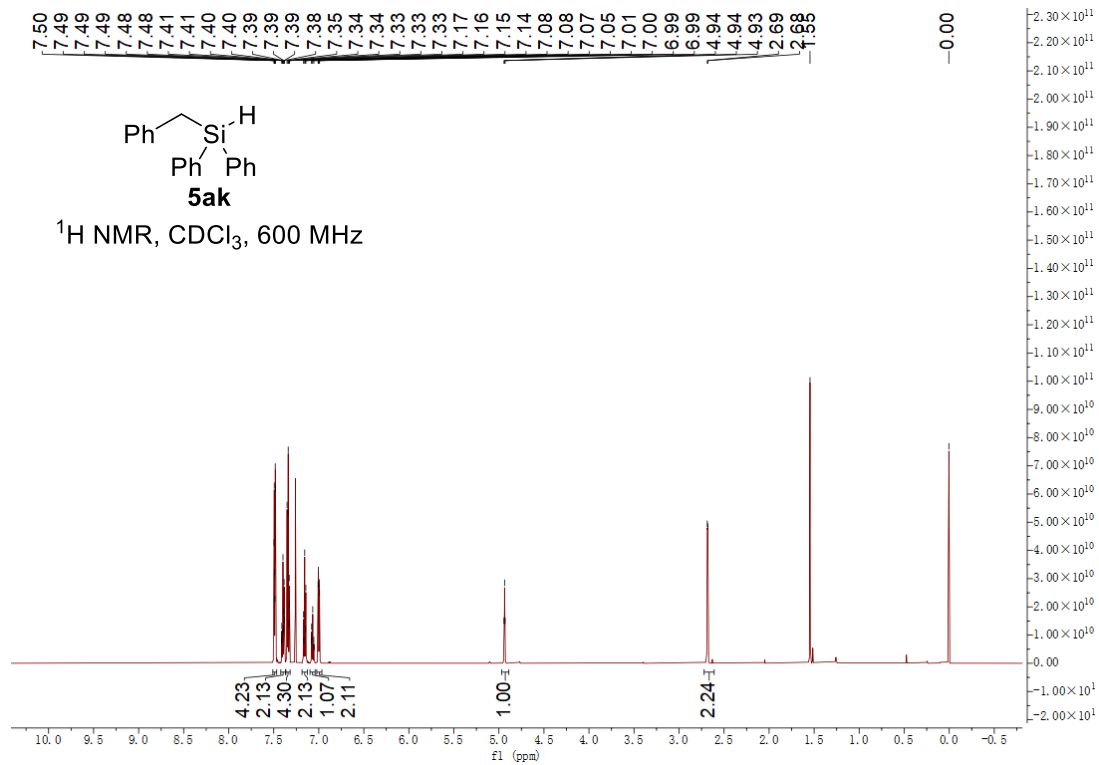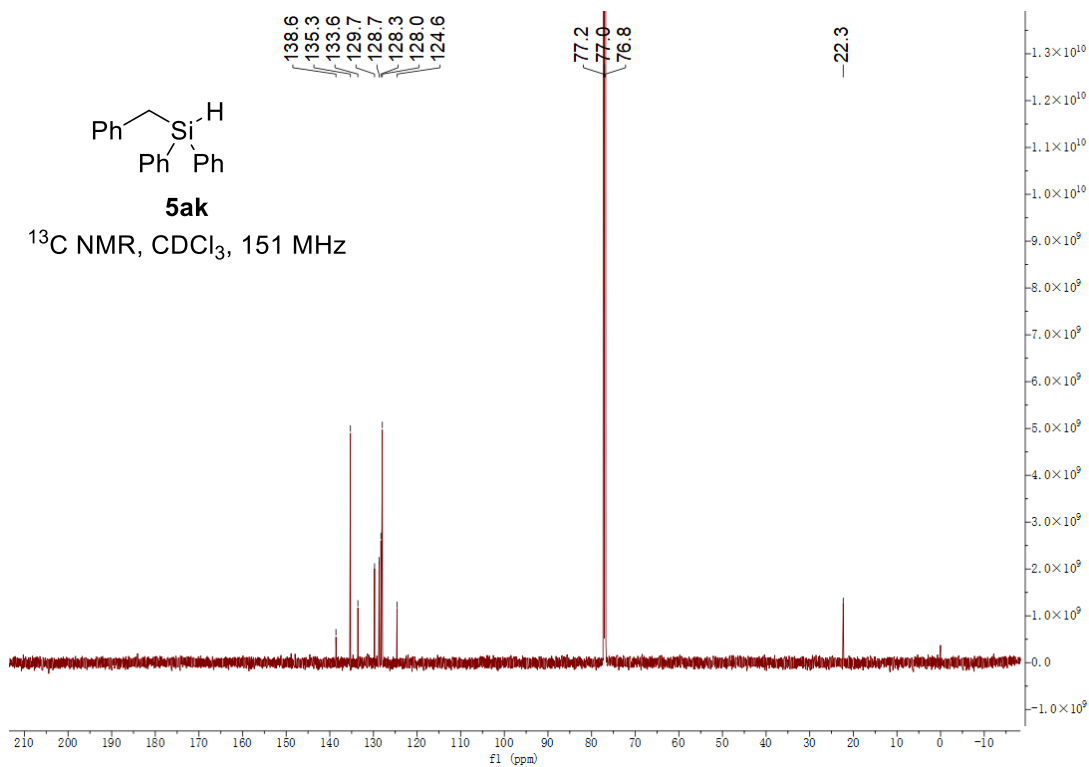

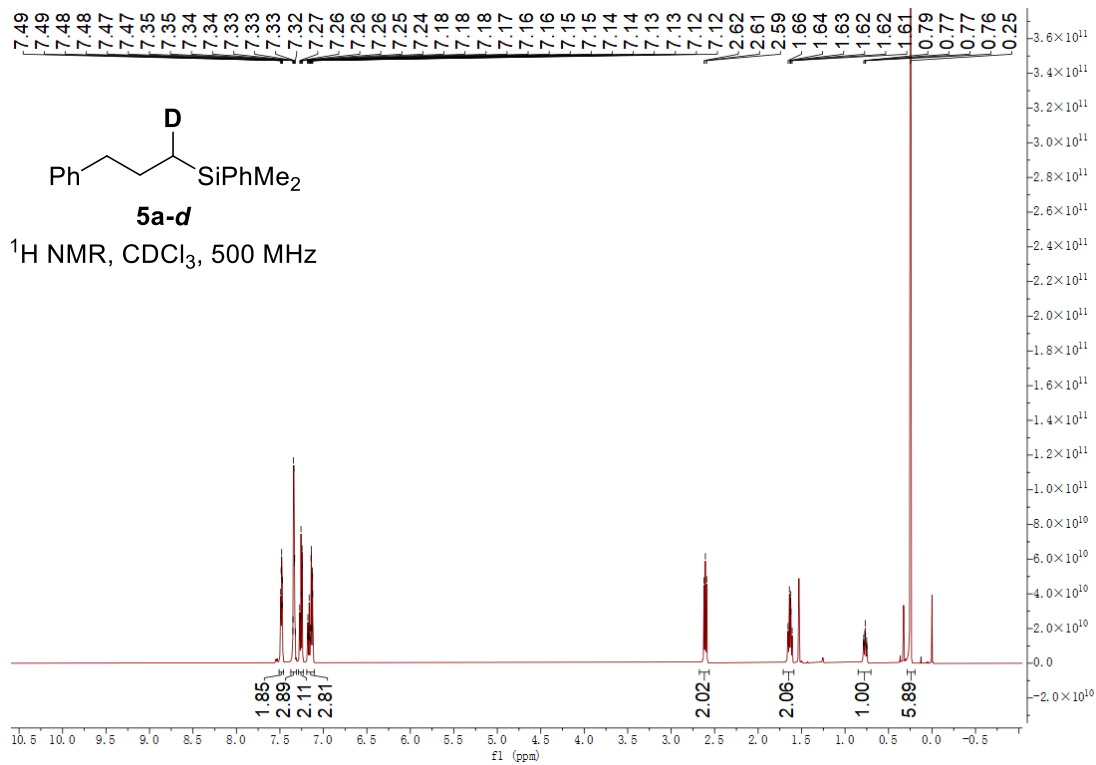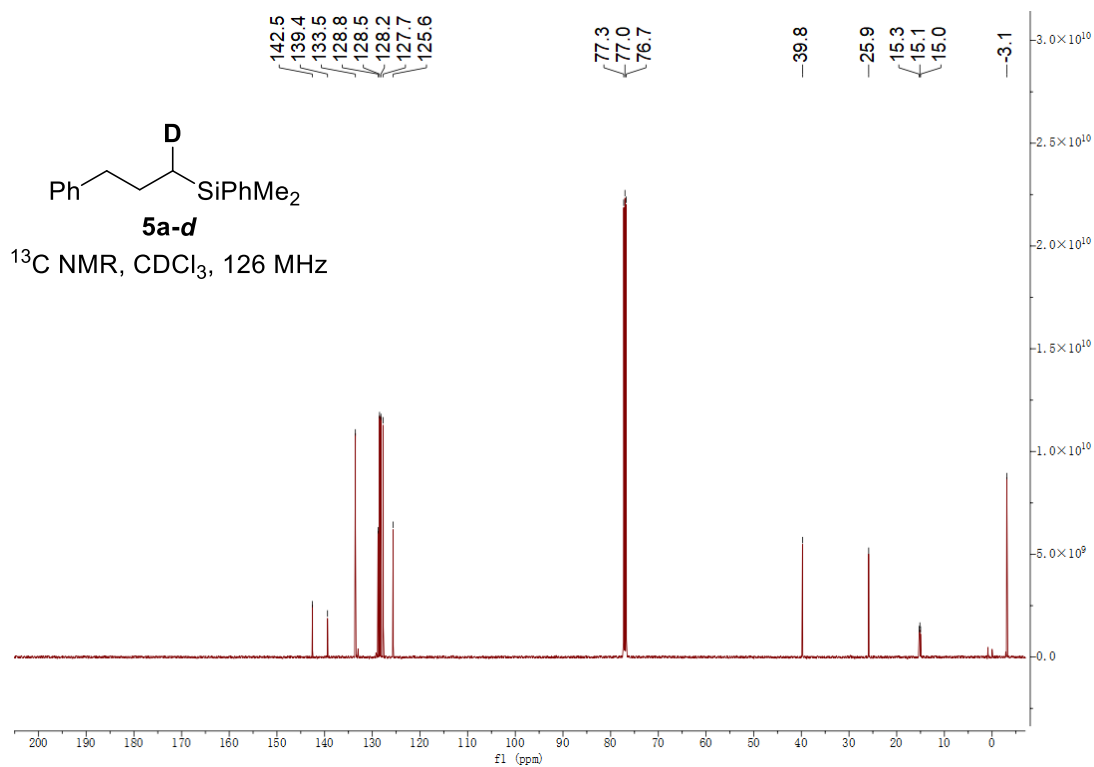

Supplement: d4qo00136b1.pdf [file d4qo00136b1.pdf]
